# Supplementary material for: Potential of N-heterocyclic carbene derivatives from Au13(dppe)5Cl2gold superatoms. Evaluation of electronic, optical and chiroptical properties from relativistic DFT
Source: Royal Society of Chemistry journal article supplement (doi:10.1039/c9qi00513g), 2019-01-01
Supplement: c9qi00513g1.pdf [file c9qi00513g1.pdf]

# Potential of N-Heterocyclic Carbene Derivatives from $\text{Au}_{13}(\text{dppe})_5\text{Cl}_2$ Gold Superatoms. Evaluation of Electronic, Optical and Chiroptical Properties from Relativistic DFT

Alvaro Muñoz-Castro<sup>a\*</sup>

*<sup>a</sup>Laboratorio de Química Inorgánica y Materiales Moleculares, Facultad de Ingeniería, Universidad Autónoma de Chile, El Llano Subercaseaux 2801, Santiago, Chile.*

Table S1. HOMO-LUMO gap calculated at both GGA-PBE and hybrid-PBE0 level (frozen electron TZ2P quality basis sets). Values in eV. Page 2.

Table S2. Structural parameters obtained for  $[\text{Au}_{13}\text{Cl}_2(\text{L})_5]^{3+}$  involving different ligands (L) along the 1-7 series at the  $T_1$  excited state. Page 2.

Figure S1. Comparison of isosurfaces related to superatomic shells. Page 3.

Figure S2. Far infrared region for optical absorption spectrum. Note, only clusters 5 and 6 shows peaks within this region. For numbering see full text. Page 4.

Figure S3. Far infrared region for circular dichroism spectrum. Note, only clusters 5 and 6 shows peaks within this region. For numbering see full text. Page 4.

Figure S4. Structural rearrangement in 7, from  $\sim D_{5h}/\sim D_{5d}$   $\text{Au}_{13}\text{Cl}_2$  core transformation at the excited state. Page 5.

Table S3. Coordinates in Angstrom for optimized structures in multiple Xmol format. Page 6.

**Table S1. HOMO-LUMO gap calculated at both GGA-PBE and hybrid-PBE0 level (frozen electron TZ2P quality basis sets). Values in eV.**

|          | <b>GGA<br/>PBE</b> | <b>hybrid<br/>PBE0</b> |
|----------|--------------------|------------------------|
| <b>1</b> | 1.875              | 3.235                  |
| <b>2</b> | 1.901              | 3.494                  |
| <b>3</b> | 1.908              | 3.392                  |
| <b>4</b> | 1.731              | 3.383                  |
| <b>5</b> | 1.757              | 3.114                  |
| <b>6</b> | 0.380              | 2.462                  |
| <b>7</b> | 1.541              | 3.023                  |
|          |                    |                        |

**Table S2. Structural parameters obtained for  $[\text{Au}_{13}\text{Cl}_2(\text{L})_5]^{3+}$  involving different ligands (L) along the 1-7 series at the  $T_1$  excited state.**

|                   | <b>1</b> | <b>2</b> | <b>3</b> | <b>4</b> | <b>5</b> | <b>6</b> | <b>7</b> |
|-------------------|----------|----------|----------|----------|----------|----------|----------|
| Au-Au             | 2.697    | 2.711    | 2.752    | 2.675    | 2.623    | 2.728    | 2.758    |
| Au-Au(L)          | 2.718    | 2.682    | 2.790    | 2.666    | 2.700    | 2.740    | 2.775    |
| Au-<br>Au(Cl)     | 2.592    | 2.855    | 2.561    | 2.721    | 2.648    | 2.666    | 2.672    |
| Au(Cl)-<br>Au(Cl) | 5.184    | 5.711    | 5.123    | 5.443    | 5.295    | 5.343    | 5.342    |
|                   |          |          |          |          |          |          |          |
| Au-L              | 2.292    | 1.945    | 2.044    | 1.972    | 1.957    | 1.919    | 1.959    |
| Au-Cl             | 2.261    | 2.302    | 2.271    | 2.273    | 2.238    | 2.169    | 2.248    |

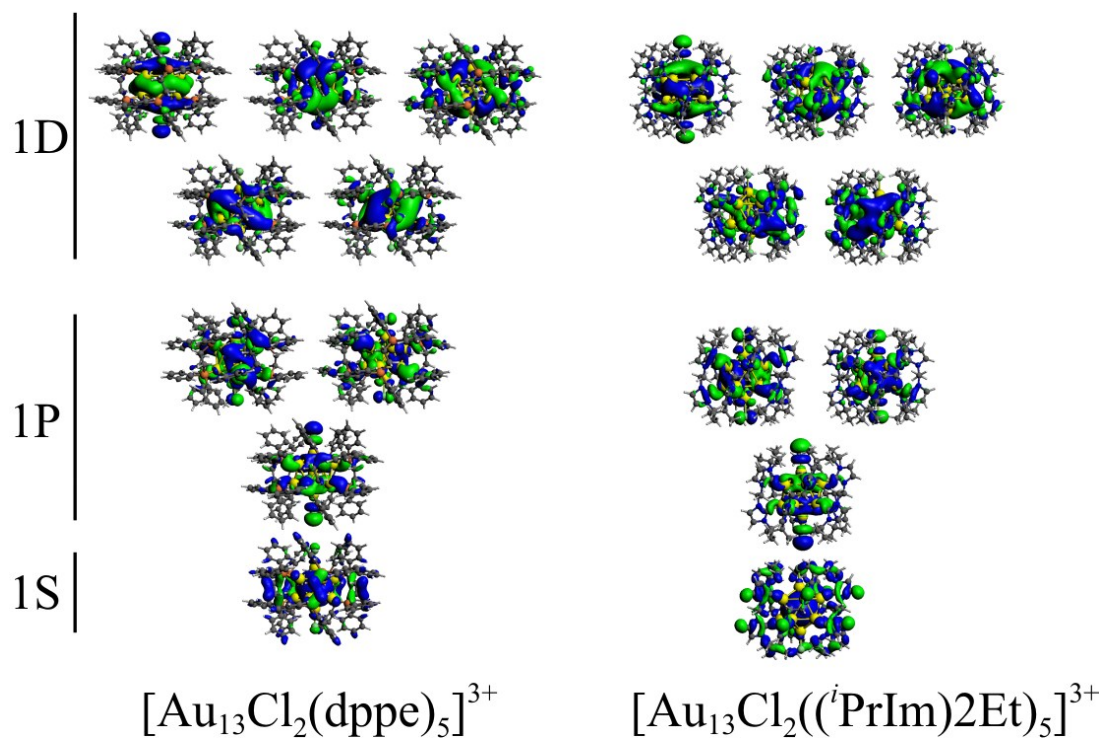

**Figure S1.** Comparison of isosurfaces related to superatomic shells.

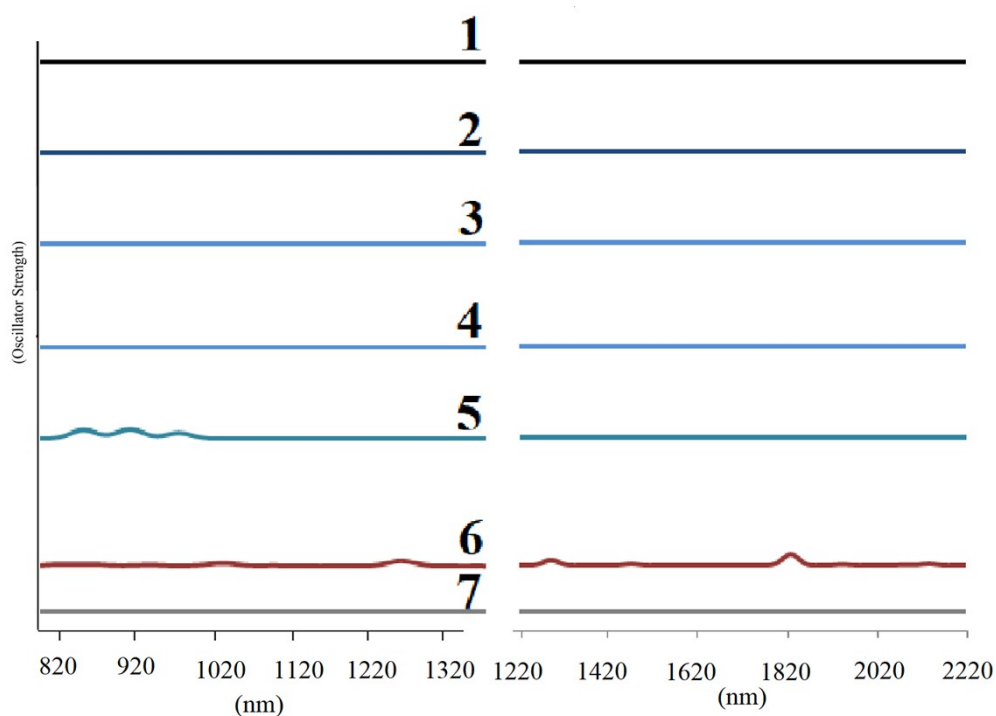

Figure S2. Far infrared region for optical absorption spectrum. Note, only clusters 5 and 6 shows peaks within this region. For numbering see full text.

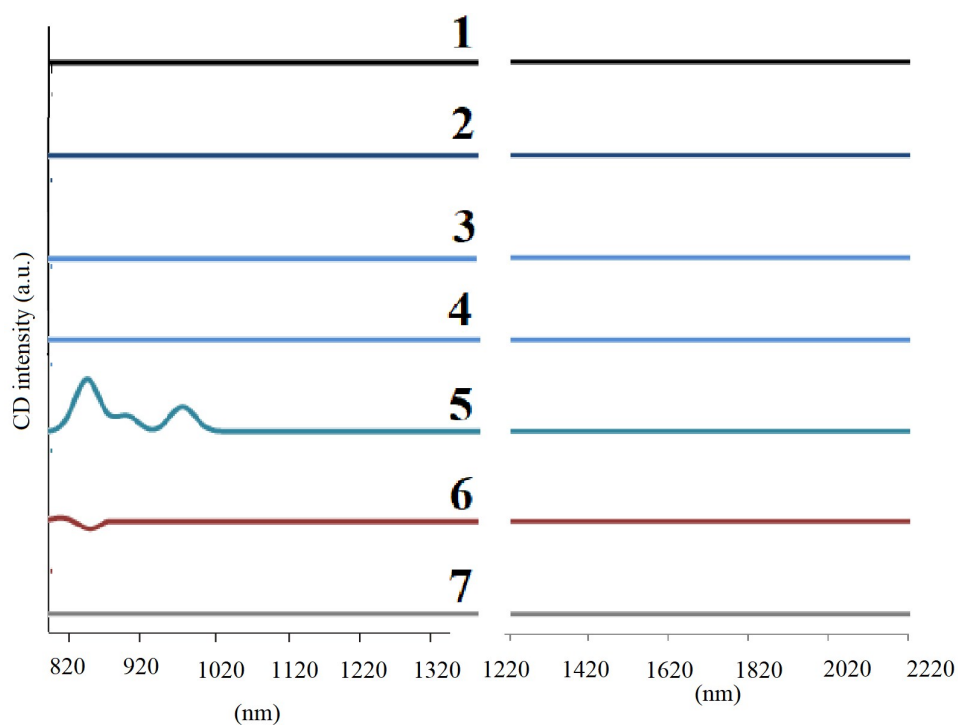

Figure S3. Far infrared region for circular dichroism spectrum. Note, only clusters 5 and 6 shows peaks within this region. For numbering see full text. Values between  $\pm 500 \times 10^{-40} \text{esu}^2 \text{cm}^2$ .

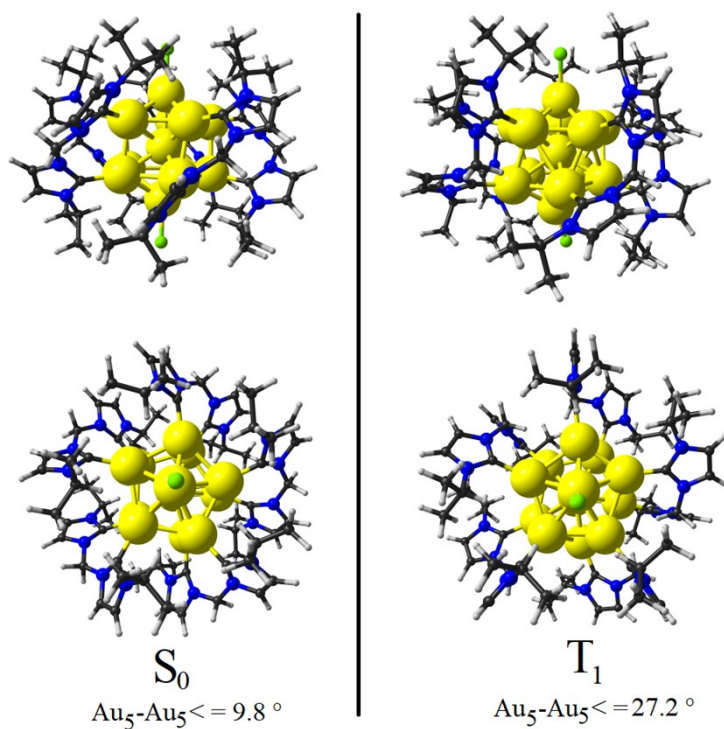

Figure S4. Structural rearrangement in **7**, from  $\sim D_{5h}/\sim D_{5d}$   $Au_{13}Cl_2$  core transformation at the excited state, denoting the twist of each  $Au_5$  rings of  $9.8^\circ$  to  $27.2^\circ$  from ground state ( $S_0$ ) to the first excited triplet-state ( $T_1$ ).

Table S3. Coordinates in Angstrom for optimized structures in multiple Xmol format.

275

1 dppe S0 Ground State

|    |         |         |         |
|----|---------|---------|---------|
| Au | 0.0000  | 0.0000  | -2.5480 |
| Au | -1.3845 | 1.9244  | 1.1549  |
| Au | 1.4024  | 1.9114  | 1.1549  |
| Au | -0.0111 | 2.3707  | -1.1549 |
| Au | -0.0111 | -2.3707 | 1.1549  |
| Au | 0.0000  | 0.0000  | 0.0000  |
| Au | -1.3845 | -1.9244 | -1.1549 |
| Au | 2.2512  | 0.7431  | -1.1549 |
| Au | 2.2512  | -0.7431 | 1.1549  |
| Au | -2.2581 | 0.7220  | -1.1549 |
| Au | -2.2581 | -0.7220 | 1.1549  |
| Au | 1.4024  | -1.9114 | -1.1549 |
| Au | 0.0000  | 0.0000  | 2.5480  |
| P  | -1.9552 | -3.9264 | -1.8186 |
| P  | 3.1301  | 3.0729  | 1.8186  |
| P  | -0.7261 | 4.3258  | -1.8186 |
| P  | 3.1301  | -3.0729 | -1.8186 |
| P  | 3.8897  | -2.0273 | 1.8186  |
| P  | -0.7261 | -4.3258 | 1.8186  |
| Cl | 0.0000  | 0.0000  | -4.7488 |
| Cl | 0.0000  | 0.0000  | 4.7488  |
| P  | -4.3384 | 0.6462  | -1.8186 |
| P  | -4.3384 | -0.6462 | 1.8186  |
| P  | 3.8897  | 2.0273  | -1.8186 |
| P  | -1.9552 | 3.9264  | 1.8186  |
| C  | 3.0796  | 4.7853  | 1.9045  |
| C  | -3.5995 | 4.4076  | 1.9045  |
| C  | -4.7444 | 3.2099  | -2.2453 |
| C  | -6.6012 | 2.0166  | -1.6407 |
| C  | -4.7444 | -3.2099 | 2.2453  |
| C  | -1.6415 | -3.0201 | 3.9059  |
| C  | -6.7660 | -4.2536 | 2.0545  |
| C  | -2.3929 | -5.1746 | 3.6925  |
| C  | -3.3796 | 0.6279  | 3.9059  |
| C  | -6.7660 | 4.2536  | -2.0545 |
| C  | -1.6415 | 3.0201  | -3.9059 |
| C  | 4.1552  | 5.5116  | 1.6407  |
| C  | -6.6012 | -2.0166 | 1.6407  |
| C  | 5.5027  | 1.4501  | -1.9045 |
| C  | 1.9516  | 5.3855  | 2.2453  |
| C  | -5.3042 | 2.0613  | -1.9045 |
| C  | -5.4763 | -4.3009 | 2.3186  |
| C  | 5.7250  | -0.1919 | 2.2453  |
| C  | -1.9037 | -4.8331 | 0.6504  |
| C  | -0.4472 | 3.4082  | 3.9059  |
| C  | -3.9578 | 5.6550  | 1.6407  |
| C  | 4.9775  | -2.7798 | -3.6925 |
| C  | 2.9736  | 7.4182  | 2.0545  |
| C  | -2.3929 | 5.1746  | -3.6925 |
| C  | -5.7348 | 1.4695  | 4.7390  |
| C  | 4.0083  | -3.3040 | 0.6504  |
| C  | -5.3042 | -2.0613 | 1.9045  |
| C  | -4.4776 | 0.2663  | 3.2638  |
| C  | 4.1009  | 6.8233  | 1.7180  |
| C  | 1.9025  | 6.6984  | 2.3186  |
| C  | -5.6608 | 0.6768  | 3.6925  |
| C  | -1.1304 | -4.3408 | -3.2638 |
| C  | 3.4659  | 2.8474  | -3.2638 |
| C  | -0.4472 | -3.4082 | -3.9059 |
| C  | 3.7790  | 2.4164  | 3.2638  |
| C  | -1.9037 | 4.8331  | -0.6504 |
| C  | -5.4763 | 4.3009  | -2.3186 |
| C  | -1.3007 | 5.0290  | 0.6504  |

|   |         |         |         |
|---|---------|---------|---------|
| C | 4.0083  | 3.3040  | -0.6504 |
| C | 5.7250  | 0.1919  | -2.2453 |
| C | -5.1848 | -0.3170 | -0.6504 |
| C | 3.7790  | -2.4164 | -3.2638 |
| C | 3.1032  | 1.4785  | 3.9059  |
| C | -1.3007 | -5.0290 | -0.6504 |
| C | -0.3745 | 5.9082  | 4.7390  |
| C | -3.1697 | -5.0000 | 4.7390  |
| C | -1.6370 | -4.1762 | 3.2638  |
| C | 5.5027  | -1.4501 | 1.9045  |
| C | -1.1304 | 4.3408  | 3.2638  |
| C | -7.3283 | -3.1098 | 1.7180  |
| C | 0.2801  | 3.7276  | 4.9545  |
| C | -3.4586 | 1.4183  | 4.9545  |
| C | -3.1697 | 5.0000  | -4.7390 |
| C | 4.1819  | -3.8748 | 3.6925  |
| C | 3.1032  | -1.4785 | -3.9059 |
| C | -5.1848 | 0.3170  | 0.6504  |
| C | 4.3809  | 2.7911  | 0.6504  |
| C | 3.4659  | -2.8474 | 3.2638  |
| C | 4.9775  | 2.7798  | 3.6925  |
| C | 4.1819  | 3.8748  | -3.6925 |
| C | 1.5866  | -5.5041 | 2.2453  |
| C | -1.6370 | 4.1762  | -3.2638 |
| C | 5.5033  | -2.1819 | -4.7390 |
| C | 6.9584  | 0.2606  | 2.3186  |
| C | -4.5189 | 3.5203  | 2.2453  |
| C | 5.5033  | 2.1819  | 4.7390  |
| C | 4.8347  | -1.2310 | -5.3645 |
| C | -4.6349 | 1.8459  | 5.3645  |
| C | 4.8347  | 1.2310  | 5.3645  |
| C | -3.1878 | -3.8377 | 5.3645  |
| C | 6.9584  | -0.2606 | -2.3186 |
| C | -3.1878 | 3.8377  | -5.3645 |
| C | 1.9546  | -7.7493 | 2.0545  |
| C | 7.7566  | -1.7916 | 1.7180  |
| C | 3.7757  | -4.5597 | 4.7390  |
| C | 1.9644  | -3.1804 | 4.9545  |
| C | -2.4177 | 2.8510  | -4.9545 |
| C | 2.6647  | -4.2177 | 5.3645  |
| C | 3.7757  | 4.5597  | -4.7390 |
| C | 7.9740  | 0.5357  | -2.0545 |
| C | 1.9644  | 3.1804  | -4.9545 |
| C | 7.9740  | -0.5357 | 2.0545  |
| C | 0.3213  | -5.6815 | 1.9045  |
| C | 6.5258  | -2.2486 | 1.6407  |
| C | 7.7566  | 1.7916  | -1.7180 |
| C | 4.1009  | -6.8233 | -1.7180 |
| C | -4.4776 | -0.2663 | -3.2638 |
| C | -6.1362 | -5.1204 | -2.0545 |
| C | -3.3796 | -0.6279 | -3.9059 |
| C | -5.7348 | -1.4695 | -4.7390 |
| C | -3.9578 | -5.6550 | -1.6407 |
| C | 1.9025  | -6.6984 | -2.3186 |
| C | -5.2221 | -6.0087 | -1.7180 |
| C | -4.5189 | -3.5203 | -2.2453 |
| C | 1.9516  | -5.3855 | -2.2453 |
| C | 3.0796  | -4.7853 | -1.9045 |
| C | 2.9736  | -7.4182 | -2.0545 |
| C | 4.1552  | -5.5116 | -1.6407 |
| C | -3.4586 | -1.4183 | -4.9545 |
| C | -5.6608 | -0.6768 | -3.6925 |
| C | 0.6930  | -7.9306 | 1.7180  |
| C | -3.5995 | -4.4076 | -1.9045 |
| C | -5.7826 | -3.8792 | -2.3186 |
| C | 6.5258  | 2.2486  | -1.6407 |
| C | 3.6317  | -0.8855 | -4.9545 |
| C | 3.6317  | 0.8855  | 4.9545  |

|   |         |         |         |
|---|---------|---------|---------|
| C | -4.6349 | -1.8459 | -5.3645 |
| C | 1.5866  | 5.5041  | -2.2453 |
| C | 0.6930  | 7.9306  | -1.7180 |
| C | -0.1220 | 6.9013  | -1.6407 |
| C | -0.1220 | -6.9013 | 1.6407  |
| C | 2.3651  | -2.4944 | 3.9059  |
| C | 0.3213  | 5.6815  | -1.9045 |
| C | 4.3809  | -2.7911 | -0.6504 |
| C | -5.2221 | 6.0087  | 1.7180  |
| C | 2.3981  | -6.5373 | 2.3186  |
| C | -5.7826 | 3.8792  | 2.3186  |
| C | -6.1362 | 5.1204  | 2.0545  |
| C | -7.3283 | 3.1098  | -1.7180 |
| C | -2.4177 | -2.8510 | 4.9545  |
| C | 2.3651  | 2.4944  | -3.9059 |
| C | 0.3233  | 4.9785  | 5.3645  |
| C | 0.2801  | -3.7276 | -4.9545 |
| C | 0.3233  | -4.9785 | -5.3645 |
| C | 2.3981  | 6.5373  | -2.3186 |
| C | 2.6647  | 4.2177  | -5.3645 |
| C | -1.1056 | -5.5928 | -3.6925 |
| C | 1.9546  | 7.7493  | -2.0545 |
| C | -0.3745 | -5.9082 | -4.7390 |
| C | -1.1056 | 5.5928  | 3.6925  |
| H | -0.3516 | 6.8904  | 5.0785  |
| H | 0.9016  | 5.2353  | 6.1892  |
| H | 0.8159  | 2.9850  | 5.4491  |
| H | -0.4802 | 2.4167  | 3.5796  |
| H | -1.6704 | 6.3252  | 3.2125  |
| H | 1.1057  | 4.8151  | 2.4689  |
| H | 1.0134  | 7.1612  | 2.5975  |
| H | 2.9343  | 8.4553  | 2.1174  |
| H | 4.9503  | 7.3883  | 1.5177  |
| H | 5.0517  | 5.0569  | 1.3704  |
| H | 2.5960  | 8.5652  | -2.1174 |
| H | 3.3894  | 6.3892  | -2.5975 |
| H | 0.3379  | 8.8870  | -1.5177 |
| H | -1.1145 | 7.0604  | -1.3704 |
| H | 1.9357  | 4.5454  | -2.4689 |
| H | 7.1239  | 1.2491  | 2.5975  |
| H | 8.9482  | -0.1779 | 2.1174  |
| H | 5.4994  | 3.5433  | 3.2125  |
| H | 6.4445  | 2.4636  | 5.0785  |
| H | 2.1500  | 1.2035  | 3.5796  |
| H | 3.0910  | 0.1465  | 5.4491  |
| H | 5.2577  | 0.7603  | 6.1892  |
| H | 8.5565  | -2.4249 | 1.5177  |
| H | 6.3705  | -3.2417 | 1.3704  |
| H | 4.9211  | 0.4363  | 2.4689  |
| H | 6.3705  | 3.2417  | -1.3704 |
| H | 8.5565  | 2.4249  | -1.5177 |
| H | 8.9482  | 0.1779  | -2.1174 |
| H | 7.1239  | -1.2491 | -2.5975 |
| H | 4.9211  | -0.4363 | -2.4689 |
| H | 1.8090  | -1.6729 | 3.5796  |
| H | 1.0945  | -2.8944 | 5.4491  |
| H | 2.3478  | -4.7654 | 6.1892  |
| H | 4.3345  | -5.3677 | 5.0785  |
| H | 5.0693  | -4.1353 | 3.2125  |
| H | -1.0320 | -2.2374 | 3.5796  |
| H | -2.4146 | -1.9353 | 5.4491  |
| H | -3.8067 | -3.7055 | 6.1892  |
| H | -3.7656 | -5.7811 | 5.0785  |
| H | -2.3665 | -6.0990 | 3.2125  |
| H | -2.4468 | 0.2901  | 3.5796  |
| H | -2.5867 | 1.6983  | 5.4491  |
| H | -4.7004 | 2.4753  | 6.1892  |
| H | -6.6618 | 1.7948  | 5.0785  |



|   |         |         |         |
|---|---------|---------|---------|
| H | -6.5318 | 0.3659  | 3.2125  |
| H | -4.2377 | 2.5395  | 2.4689  |
| H | -3.2484 | 6.3671  | 1.3704  |
| H | -5.4970 | 6.9912  | 1.5177  |
| H | -7.1347 | 5.4035  | 2.1174  |
| H | -6.4975 | 3.1767  | 2.5975  |
| H | -7.0593 | 1.1218  | -1.3704 |
| H | -8.3477 | 3.0676  | -1.5177 |
| H | -7.3438 | 5.1157  | -2.1174 |
| H | -5.0291 | 5.1979  | -2.5975 |
| H | -3.7247 | 3.2455  | -2.4689 |
| H | -1.0320 | 2.2374  | -3.5796 |
| H | -2.3665 | 6.0990  | -3.2125 |
| H | -2.4146 | 1.9353  | -5.4491 |
| H | -3.8067 | 3.7055  | -6.1892 |
| H | -3.7656 | 5.7811  | -5.0785 |
| H | -2.4468 | -0.2901 | -3.5796 |
| H | -2.5867 | -1.6983 | -5.4491 |
| H | -4.7004 | -2.4753 | -6.1892 |
| H | -6.6618 | -1.7948 | -5.0785 |
| H | -6.5318 | -0.3659 | -3.2125 |
| H | -4.2377 | -2.5395 | -2.4689 |
| H | -3.2484 | -6.3671 | -1.3704 |
| H | -5.4970 | -6.9912 | -1.5177 |
| H | -7.1347 | -5.4035 | -2.1174 |
| H | -6.4975 | -3.1767 | -2.5975 |
| H | -8.3477 | -3.0676 | 1.5177  |
| H | -7.0593 | -1.1218 | 1.3704  |
| H | -5.0291 | -5.1979 | 2.5975  |
| H | -7.3438 | -5.1157 | 2.1174  |
| H | -3.7247 | -3.2455 | 2.4689  |
| H | -1.1145 | -7.0604 | 1.3704  |
| H | 0.3379  | -8.8870 | 1.5177  |
| H | 2.5960  | -8.5652 | 2.1174  |
| H | 3.3894  | -6.3892 | 2.5975  |
| H | 1.9357  | -4.5454 | 2.4689  |
| H | 5.0517  | -5.0569 | -1.3704 |
| H | 4.9503  | -7.3883 | -1.5177 |
| H | 2.9343  | -8.4553 | -2.1174 |
| H | 1.0134  | -7.1612 | -2.5975 |
| H | 1.1057  | -4.8151 | -2.4689 |
| H | -0.4802 | -2.4167 | -3.5796 |
| H | 0.8159  | -2.9850 | -5.4491 |
| H | 0.9016  | -5.2353 | -6.1892 |
| H | -0.3516 | -6.8904 | -5.0785 |
| H | -1.6704 | -6.3252 | -3.2125 |
| H | 2.1500  | -1.2035 | -3.5796 |
| H | 3.0910  | -0.1465 | -5.4491 |
| H | 5.2577  | -0.7603 | -6.1892 |
| H | 6.4445  | -2.4636 | -5.0785 |
| H | 5.4994  | -3.5433 | -3.2125 |
| H | 5.0693  | 4.1353  | -3.2125 |
| H | 1.8090  | 1.6729  | -3.5796 |
| H | 1.0945  | 2.8944  | -5.4491 |
| H | 2.3478  | 4.7654  | -6.1892 |
| H | 4.3345  | 5.3677  | -5.0785 |
| H | 3.0735  | -3.7888 | 0.6404  |
| H | 4.6871  | -4.0225 | 1.0010  |
| H | 4.5531  | -1.7523 | -0.6404 |
| H | 5.2740  | -3.2147 | -1.0010 |
| H | -1.4276 | -6.0092 | -1.0010 |
| H | -2.6536 | -4.0939 | 0.6404  |
| H | -6.1563 | -0.4992 | -1.0010 |
| H | -4.7135 | 1.2586  | 0.6404  |
| H | -2.6536 | 4.0939  | -0.6404 |
| H | -1.4276 | 6.0092  | 1.0010  |
| H | 3.0735  | 3.7888  | -0.6404 |
| H | 4.5531  | 1.7523  | 0.6404  |

|   |         |         |         |
|---|---------|---------|---------|
| H | 4.6871  | 4.0225  | -1.0010 |
| H | 5.2740  | 3.2147  | 1.0010  |
| H | -0.2595 | -4.8718 | -0.6404 |
| H | -2.3772 | -5.7007 | 1.0010  |
| H | -4.7135 | -1.2586 | -0.6404 |
| H | -6.1563 | 0.4992  | 1.0010  |
| H | -2.3772 | 5.7007  | -1.0010 |
| H | -0.2595 | 4.8718  | 0.6404  |

215

2 NHC S0 Ground State

|    |         |         |         |
|----|---------|---------|---------|
| Au | -1.4874 | 1.9095  | 1.2098  |
| Au | 0.0810  | 2.4191  | -1.2098 |
| N  | 0.4211  | 4.6971  | -3.0759 |
| N  | -0.4276 | 5.2818  | -1.2989 |
| C  | 0.0558  | 4.2463  | -1.9202 |
| C  | 0.1554  | 5.9836  | -3.1821 |
| H  | 0.3745  | 6.5339  | -4.0223 |
| C  | -0.3802 | 6.3533  | -2.0654 |
| H  | -0.7069 | 7.2775  | -1.7544 |
| C  | 1.0628  | 3.9241  | -4.0695 |
| H  | 1.1879  | 2.9928  | -3.6180 |
| C  | 0.2181  | 3.7722  | -5.2364 |
| H  | 0.6902  | 3.1500  | -5.9260 |
| H  | 0.0323  | 4.6881  | -5.6997 |
| H  | -0.6867 | 3.3261  | -4.9808 |
| C  | 2.3583  | 4.4958  | -4.3888 |
| H  | 2.9546  | 4.5877  | -3.5399 |
| H  | 2.2636  | 5.4351  | -4.8311 |
| H  | 2.8499  | 3.8813  | -5.0706 |
| C  | -0.9338 | 5.2371  | -0.0084 |
| N  | -2.7586 | 4.5244  | 1.2989  |
| N  | -3.1016 | 3.5525  | 3.0759  |
| C  | -2.5411 | 3.4025  | 1.9202  |
| C  | -3.4268 | 5.3634  | 2.0654  |
| H  | -3.7057 | 6.3031  | 1.7544  |
| C  | -3.6428 | 4.7495  | 3.1821  |
| H  | -4.1435 | 5.0659  | 4.0223  |
| C  | -2.3228 | 4.7858  | 0.0084  |
| C  | -3.1664 | 2.5500  | 4.0695  |
| H  | -2.7201 | 1.7230  | 3.6180  |
| C  | -2.3937 | 2.9236  | 5.2364  |
| H  | -2.7817 | 3.7738  | 5.6997  |
| H  | -1.3995 | 3.0945  | 4.9808  |
| H  | -2.4099 | 2.1427  | 5.9260  |
| C  | -4.5505 | 2.2510  | 4.3888  |
| H  | -4.5870 | 1.4649  | 5.0706  |
| H  | -5.0869 | 1.9749  | 3.5399  |
| H  | -5.0260 | 3.0666  | 4.8311  |
| H  | -0.8410 | 6.1844  | 0.4136  |
| H  | -0.3559 | 4.5632  | 0.5368  |
| H  | -2.9548 | 5.4976  | -0.4136 |
| H  | -2.3942 | 3.9009  | -0.5368 |
| Au | 2.3257  | -0.6705 | 1.2098  |
| Au | 1.3564  | -2.0046 | -1.2098 |
| N  | 2.4202  | -4.0476 | -3.0759 |
| N  | 3.4505  | -4.0217 | -1.2989 |
| C  | 2.4508  | -3.4682 | -1.9202 |
| C  | 3.3914  | -4.9322 | -3.1821 |
| H  | 3.5376  | -5.5062 | -4.0223 |
| C  | 4.0420  | -4.9165 | -2.0654 |
| H  | 4.8495  | -5.4721 | -1.7544 |
| C  | 1.4467  | -3.7994 | -4.0695 |
| H  | 0.7981  | -3.1194 | -3.6180 |
| C  | 2.0408  | -3.1800 | -5.2364 |
| H  | 1.2931  | -2.9541 | -5.9260 |
| H  | 2.7295  | -3.8117 | -5.6997 |
| H  | 2.5106  | -2.2872 | -4.9808 |
| C  | 0.7347  | -5.0233 | -4.3888 |

|    |         |         |         |
|----|---------|---------|---------|
| H  | 0.3063  | -5.4482 | -3.5399 |
| H  | 1.3634  | -5.7276 | -4.8311 |
| H  | -0.0242 | -4.8152 | -5.0706 |
| C  | 3.8338  | -3.6880 | -0.0084 |
| N  | 4.8911  | -2.0389 | 1.2989  |
| N  | 4.5973  | -1.0510 | 3.0759  |
| C  | 4.0558  | -1.2591 | 1.9202  |
| C  | 5.9249  | -2.3248 | 2.0654  |
| H  | 6.7029  | -2.9212 | 1.7544  |
| C  | 5.7388  | -1.7013 | 3.1821  |
| H  | 6.3299  | -1.6629 | 4.0223  |
| C  | 4.6922  | -2.5065 | 0.0084  |
| C  | 4.0605  | -0.2018 | 4.0695  |
| H  | 3.2134  | 0.2049  | 3.6180  |
| C  | 3.6550  | -0.9583 | 5.2364  |
| H  | 4.4687  | -1.4180 | 5.6997  |
| H  | 2.9511  | -1.6810 | 4.9808  |
| H  | 3.2091  | -0.3170 | 5.9260  |
| C  | 5.0045  | 0.8536  | 4.3888  |
| H  | 4.5720  | 1.5110  | 5.0706  |
| H  | 5.2762  | 1.3923  | 3.5399  |
| H  | 5.8686  | 0.4733  | 4.8311  |
| H  | 4.3155  | -4.5090 | 0.4136  |
| H  | 2.9701  | -3.4825 | 0.5368  |
| H  | 5.6219  | -2.7109 | -0.4136 |
| H  | 4.2298  | -1.7486 | -0.5368 |
| Au | 1.3564  | 2.0046  | 1.2098  |
| Au | 2.3257  | 0.6705  | -1.2098 |
| N  | 4.5973  | 1.0510  | -3.0759 |
| N  | 4.8911  | 2.0389  | -1.2989 |
| C  | 4.0558  | 1.2591  | -1.9202 |
| C  | 5.7388  | 1.7013  | -3.1821 |
| H  | 6.3299  | 1.6629  | -4.0223 |
| C  | 5.9249  | 2.3248  | -2.0654 |
| H  | 6.7029  | 2.9212  | -1.7544 |
| C  | 4.0605  | 0.2018  | -4.0695 |
| H  | 3.2134  | -0.2049 | -3.6180 |
| C  | 3.6550  | 0.9583  | -5.2364 |
| H  | 3.2091  | 0.3170  | -5.9260 |
| H  | 4.4687  | 1.4180  | -5.6997 |
| H  | 2.9511  | 1.6810  | -4.9808 |
| C  | 5.0045  | -0.8536 | -4.3888 |
| H  | 5.2762  | -1.3923 | -3.5399 |
| H  | 5.8686  | -0.4733 | -4.8311 |
| H  | 4.5720  | -1.5110 | -5.0706 |
| C  | 4.6922  | 2.5065  | -0.0084 |
| N  | 3.4505  | 4.0217  | 1.2989  |
| N  | 2.4202  | 4.0476  | 3.0759  |
| C  | 2.4508  | 3.4682  | 1.9202  |
| C  | 4.0420  | 4.9165  | 2.0654  |
| H  | 4.8495  | 5.4721  | 1.7544  |
| C  | 3.3914  | 4.9322  | 3.1821  |
| H  | 3.5376  | 5.5062  | 4.0223  |
| C  | 3.8338  | 3.6880  | 0.0084  |
| C  | 1.4467  | 3.7994  | 4.0695  |
| H  | 0.7981  | 3.1194  | 3.6180  |
| C  | 2.0408  | 3.1800  | 5.2364  |
| H  | 2.7295  | 3.8117  | 5.6997  |
| H  | 2.5106  | 2.2872  | 4.9808  |
| H  | 1.2931  | 2.9541  | 5.9260  |
| C  | 0.7347  | 5.0233  | 4.3888  |
| H  | -0.0242 | 4.8152  | 5.0706  |
| H  | 0.3063  | 5.4482  | 3.5399  |
| H  | 1.3634  | 5.7276  | 4.8311  |
| H  | 5.6219  | 2.7109  | 0.4136  |
| H  | 4.2298  | 1.7486  | 0.5368  |
| H  | 4.3155  | 4.5090  | -0.4136 |
| H  | 2.9701  | 3.4825  | -0.5368 |

|    |         |         |         |
|----|---------|---------|---------|
| Au | 0.0810  | -2.4191 | 1.2098  |
| Au | -1.4874 | -1.9095 | -1.2098 |
| N  | -3.1016 | -3.5525 | -3.0759 |
| N  | -2.7586 | -4.5244 | -1.2989 |
| C  | -2.5411 | -3.4025 | -1.9202 |
| C  | -3.6428 | -4.7495 | -3.1821 |
| H  | -4.1435 | -5.0659 | -4.0223 |
| C  | -3.4268 | -5.3634 | -2.0654 |
| H  | -3.7057 | -6.3031 | -1.7544 |
| C  | -3.1664 | -2.5500 | -4.0695 |
| H  | -2.7201 | -1.7230 | -3.6180 |
| C  | -2.3937 | -2.9236 | -5.2364 |
| H  | -2.4099 | -2.1427 | -5.9260 |
| H  | -2.7817 | -3.7738 | -5.6997 |
| H  | -1.3995 | -3.0945 | -4.9808 |
| C  | -4.5505 | -2.2510 | -4.3888 |
| H  | -5.0869 | -1.9749 | -3.5399 |
| H  | -5.0260 | -3.0666 | -4.8311 |
| H  | -4.5870 | -1.4649 | -5.0706 |
| C  | -2.3228 | -4.7858 | -0.0084 |
| N  | -0.4276 | -5.2818 | 1.2989  |
| N  | 0.4211  | -4.6971 | 3.0759  |
| C  | 0.0558  | -4.2463 | 1.9202  |
| C  | -0.3802 | -6.3533 | 2.0654  |
| H  | -0.7069 | -7.2775 | 1.7544  |
| C  | 0.1554  | -5.9836 | 3.1821  |
| H  | 0.3745  | -6.5339 | 4.0223  |
| C  | -0.9338 | -5.2371 | 0.0084  |
| C  | 1.0628  | -3.9241 | 4.0695  |
| H  | 1.1879  | -2.9928 | 3.6180  |
| C  | 0.2181  | -3.7722 | 5.2364  |
| H  | 0.0323  | -4.6881 | 5.6997  |
| H  | -0.6867 | -3.3261 | 4.9808  |
| H  | 0.6902  | -3.1500 | 5.9260  |
| C  | 2.3583  | -4.4958 | 4.3888  |
| H  | 2.8499  | -3.8813 | 5.0706  |
| H  | 2.9546  | -4.5877 | 3.5399  |
| H  | 2.2636  | -5.4351 | 4.8311  |
| H  | -2.9548 | -5.4976 | 0.4136  |
| H  | -2.3942 | -3.9009 | 0.5368  |
| H  | -0.8410 | -6.1844 | -0.4136 |
| H  | -0.3559 | -4.5632 | -0.5368 |
| Au | 0.0000  | 0.0000  | -2.6495 |
| Au | -2.2756 | -0.8245 | 1.2098  |
| Au | -2.2756 | 0.8245  | -1.2098 |
| Au | 0.0000  | 0.0000  | 0.0000  |
| Au | 0.0000  | 0.0000  | 2.6495  |
| Cl | 0.0000  | 0.0000  | -4.8989 |
| Cl | 0.0000  | 0.0000  | 4.8989  |
| N  | -4.3371 | 1.8520  | -3.0759 |
| N  | -5.1554 | 1.2254  | -1.2989 |
| C  | -4.0213 | 1.3653  | -1.9202 |
| C  | -5.6428 | 1.9968  | -3.1821 |
| H  | -6.0984 | 2.3753  | -4.0223 |
| C  | -6.1599 | 1.6017  | -2.0654 |
| H  | -7.1398 | 1.5765  | -1.7544 |
| C  | -3.4036 | 2.2234  | -4.0695 |
| H  | -2.4792 | 2.0546  | -3.6180 |
| C  | -3.5202 | 1.3731  | -5.2364 |
| H  | -2.7825 | 1.6298  | -5.9260 |
| H  | -4.4487 | 1.4794  | -5.6997 |
| H  | -3.3755 | 0.3747  | -4.9808 |
| C  | -3.5470 | 3.6321  | -4.3888 |
| H  | -3.4501 | 4.2277  | -3.5399 |
| H  | -4.4696 | 3.8324  | -4.8311 |
| H  | -2.8107 | 3.9098  | -5.0706 |
| C  | -5.2693 | 0.7302  | -0.0084 |
| N  | -5.1554 | -1.2254 | 1.2989  |

|   |         |         |         |
|---|---------|---------|---------|
| N | -4.3371 | -1.8520 | 3.0759  |
| C | -4.0213 | -1.3653 | 1.9202  |
| C | -6.1599 | -1.6017 | 2.0654  |
| H | -7.1398 | -1.5765 | 1.7544  |
| C | -5.6428 | -1.9968 | 3.1821  |
| H | -6.0984 | -2.3753 | 4.0223  |
| C | -5.2693 | -0.7302 | 0.0084  |
| C | -3.4036 | -2.2234 | 4.0695  |
| H | -2.4792 | -2.0546 | 3.6180  |
| C | -3.5202 | -1.3731 | 5.2364  |
| H | -4.4487 | -1.4794 | 5.6997  |
| H | -3.3755 | -0.3747 | 4.9808  |
| H | -2.7825 | -1.6298 | 5.9260  |
| C | -3.5470 | -3.6321 | 4.3888  |
| H | -2.8107 | -3.9098 | 5.0706  |
| H | -3.4501 | -4.2277 | 3.5399  |
| H | -4.4696 | -3.8324 | 4.8311  |
| H | -6.1416 | 1.1113  | 0.4136  |
| H | -4.4498 | 1.0716  | 0.5368  |
| H | -6.1416 | -1.1113 | -0.4136 |
| H | -4.4498 | -1.0716 | -0.5368 |

375

3 NHC-iPr S0 Ground State

|    |          |           |           |
|----|----------|-----------|-----------|
| Au | 2.30394  | 0.91143   | 1.24165   |
| Au | 2.30394  | -0.91143  | -1.24165  |
| N  | 4.13516  | -2.282945 | -3.079425 |
| N  | 5.143395 | -1.372845 | -1.218565 |
| C  | 4.11274  | -1.631055 | -1.960895 |
| C  | 2.87641  | -2.47741  | -3.74262  |
| H  | 2.185    | -1.932015 | -3.18003  |
| C  | 2.85019  | -1.94655  | -5.095515 |
| H  | 1.867605 | -1.97714  | -5.44692  |
| H  | 3.4466   | -2.484725 | -5.76555  |
| H  | 3.139465 | -0.946105 | -5.12183  |
| C  | 2.47912  | -3.87334  | -3.705285 |
| H  | 2.536975 | -4.25011  | -2.734765 |
| H  | 3.050165 | -4.47811  | -4.338745 |
| H  | 1.48846  | -3.951145 | -4.01356  |
| C  | 4.95691  | -0.73416  | 0.025175  |
| N  | 5.143395 | 1.372845  | 1.218565  |
| N  | 4.13516  | 2.282945  | 3.079425  |
| C  | 4.11274  | 1.631055  | 1.960895  |
| C  | 4.95691  | 0.73416   | -0.025175 |
| C  | 2.87641  | 2.47741   | 3.74262   |
| C  | 2.85019  | 1.94655   | 5.095515  |
| H  | 3.4466   | 2.484725  | 5.76555   |
| H  | 3.139465 | 0.946105  | 5.12183   |
| H  | 1.867605 | 1.97714   | 5.44692   |
| C  | 2.47912  | 3.87334   | 3.705285  |
| H  | 1.48846  | 3.951145  | 4.01356   |
| H  | 2.536975 | 4.25011   | 2.734765  |
| H  | 3.050165 | 4.47811   | 4.338745  |
| H  | 5.722705 | -1.059155 | 0.650085  |
| H  | 4.056025 | -1.06362  | 0.43852   |
| H  | 5.722705 | 1.059155  | -0.650085 |
| H  | 4.056025 | 1.06362   | -0.43852  |
| H  | 2.185    | 1.932015  | 3.18003   |
| C  | 5.14938  | 3.003045  | 3.828975  |
| H  | 4.578715 | 3.39017   | 4.60636   |
| C  | 5.672355 | 4.2047    | 3.18155   |
| C  | 6.12674  | 2.17873   | 4.53815   |
| H  | 5.64509  | 1.41037   | 5.053525  |
| H  | 6.874485 | 1.751515  | 3.953045  |
| H  | 6.601075 | 2.783595  | 5.246945  |
| H  | 6.367375 | 4.044435  | 2.422405  |
| H  | 6.146405 | 4.785435  | 3.911245  |
| H  | 4.889365 | 4.76805   | 2.784165  |
| C  | 5.14938  | -3.003045 | -3.828975 |

|    |           |           |           |
|----|-----------|-----------|-----------|
| H  | 4.578715  | -3.39017  | -4.60636  |
| C  | 5.672355  | -4.2047   | -3.18155  |
| C  | 6.12674   | -2.17873  | -4.53815  |
| H  | 5.64509   | -1.41037  | -5.053525 |
| H  | 6.874485  | -1.751515 | -3.953045 |
| H  | 6.601075  | -2.783595 | -5.246945 |
| H  | 6.367375  | -4.044435 | -2.422405 |
| H  | 6.146405  | -4.785435 | -3.911245 |
| H  | 4.889365  | -4.76805  | -2.784165 |
| C  | 6.4923    | 1.734985  | 1.48618   |
| H  | 6.44746   | 2.30565   | 2.339565  |
| C  | 7.072655  | 2.584095  | 0.453055  |
| C  | 7.34502   | 0.596315  | 1.79398   |
| H  | 6.92949   | 0.002185  | 2.54429   |
| H  | 7.532455  | 0.00057   | 0.9595    |
| H  | 8.271745  | 0.942875  | 2.13256   |
| H  | 7.332765  | 2.06112   | -0.4123   |
| H  | 7.9534    | 3.011975  | 0.817665  |
| H  | 6.423045  | 3.35597   | 0.18734   |
| C  | 6.4923    | -1.734985 | -1.48618  |
| H  | 6.44746   | -2.30565  | -2.339565 |
| C  | 7.072655  | -2.584095 | -0.453055 |
| C  | 7.34502   | -0.596315 | -1.79398  |
| H  | 6.92949   | -0.002185 | -2.54429  |
| H  | 7.532455  | -0.00057  | -0.9595   |
| H  | 8.271745  | -0.942875 | -2.13256  |
| H  | 7.332765  | -2.06112  | 0.4123    |
| H  | 7.9534    | -3.011975 | -0.817665 |
| H  | 6.423045  | -3.35597  | -0.18734  |
| Au | 1.578805  | -1.909595 | 1.24165   |
| Au | -0.15485  | -2.47285  | -1.24165  |
| N  | -0.89338  | -4.63828  | -3.079425 |
| N  | 0.283765  | -5.315915 | -1.218565 |
| C  | -0.280345 | -4.41541  | -1.960895 |
| C  | -1.467275 | -3.50113  | -3.74262  |
| H  | -1.16223  | -2.675105 | -3.18003  |
| C  | -0.97052  | -3.312175 | -5.095515 |
| H  | -1.303305 | -2.38716  | -5.44692  |
| H  | -1.29808  | -4.045765 | -5.76555  |
| H  | 0.070395  | -3.278165 | -5.12183  |
| C  | -2.91764  | -3.55471  | -3.705285 |
| H  | -3.25812  | -3.72609  | -2.734765 |
| H  | -3.316355 | -4.28469  | -4.338745 |
| H  | -3.297735 | -2.636535 | -4.01356  |
| C  | 0.83353   | -4.94114  | 0.025175  |
| N  | 2.89503   | -4.467375 | 1.218565  |
| N  | 3.44907   | -3.22734  | 3.079425  |
| C  | 2.822165  | -3.407365 | 1.960895  |
| C  | 2.23003   | -4.48742  | -0.025175 |
| C  | 3.24501   | -1.970015 | 3.74262   |
| C  | 2.73201   | -2.10919  | 5.095515  |
| H  | 3.428265  | -2.51009  | 5.76555   |
| H  | 1.869885  | -2.69344  | 5.12183   |
| H  | 2.45746   | -1.165175 | 5.44692   |
| C  | 4.449895  | -1.1609   | 3.705285  |
| H  | 4.217715  | -0.194655 | 4.01356   |
| H  | 4.826095  | -1.099435 | 2.734765  |
| H  | 5.20144   | -1.517055 | 4.338745  |
| H  | 0.761045  | -5.76992  | 0.650085  |
| H  | 0.24187   | -4.186175 | 0.43852   |
| H  | 2.77571   | -5.11537  | -0.650085 |
| H  | 2.26499   | -3.52887  | -0.43852  |
| H  | 2.512655  | -1.48105  | 3.18003   |
| C  | 4.447235  | -3.969385 | 3.828975  |
| H  | 4.639135  | -3.30695  | 4.60636   |
| C  | 5.751775  | -4.09545  | 3.18155   |
| C  | 3.9653    | -5.153655 | 4.53815   |
| H  | 3.08579   | -4.93297  | 5.053525  |

|    |           |           |           |
|----|-----------|-----------|-----------|
| H  | 3.79012   | -5.99678  | 3.953045  |
| H  | 4.687205  | -5.41785  | 5.246945  |
| H  | 5.81419   | -4.80586  | 2.422405  |
| H  | 6.4505    | -4.36677  | 3.911245  |
| H  | 6.04561   | -3.176705 | 2.784165  |
| C  | -1.26483  | -5.825305 | -3.828975 |
| H  | -1.80937  | -5.402175 | -4.60636  |
| C  | -2.24599  | -6.69408  | -3.18155  |
| C  | -0.17879  | -6.500185 | -4.53815  |
| H  | 0.403085  | -5.804595 | -5.053525 |
| H  | 0.458565  | -7.079305 | -3.953045 |
| H  | -0.607525 | -7.138205 | -5.246945 |
| H  | -1.87891  | -7.3055   | -2.422405 |
| H  | -2.65183  | -7.32431  | -3.911245 |
| H  | -3.023755 | -6.12351  | -2.784165 |
| C  | 3.65636   | -5.63844  | 1.48618   |
| H  | 4.185225  | -5.419465 | 2.339565  |
| C  | 4.64322   | -5.927905 | 0.453055  |
| C  | 2.83689   | -6.801335 | 1.79398   |
| H  | 2.14339   | -6.589675 | 2.54429   |
| H  | 2.32826   | -7.163665 | 0.9595    |
| H  | 3.45287   | -7.575585 | 2.13256   |
| H  | 4.22617   | -6.336975 | -0.4123   |
| H  | 5.32228   | -6.63347  | 0.817665  |
| H  | 5.17655   | -5.071575 | 0.18734   |
| C  | 0.356155  | -6.710705 | -1.48618  |
| H  | -0.20045  | -6.84437  | -2.339565 |
| C  | -0.27208  | -7.525045 | -0.453055 |
| C  | 1.70259   | -7.16984  | -1.79398  |
| H  | 2.13921   | -6.591005 | -2.54429  |
| H  | 2.32712   | -7.164045 | -0.9595   |
| H  | 1.659365  | -8.158315 | -2.13256  |
| H  | 0.30571   | -7.610735 | 0.4123    |
| H  | -0.40679  | -8.4949   | -0.817665 |
| H  | -1.20688  | -7.14571  | -0.18734  |
| Au | -1.328195 | -2.091615 | 1.24165   |
| Au | -2.3997   | -0.616835 | -1.24165  |
| N  | -4.6873   | -0.583585 | -3.079425 |
| N  | -4.968025 | -1.91254  | -1.218565 |
| C  | -4.285925 | -1.09782  | -1.960895 |
| C  | -3.783185 | 0.313595  | -3.74262  |
| H  | -2.90339  | 0.27873   | -3.18003  |
| C  | -3.45002  | -0.10051  | -5.095515 |
| H  | -2.673015 | 0.50179   | -5.44692  |
| H  | -4.248875 | -0.015675 | -5.76555  |
| H  | -3.095955 | -1.079865 | -5.12183  |
| C  | -4.282315 | 1.67637   | -3.705285 |
| H  | -4.550595 | 1.947215  | -2.734765 |
| H  | -5.09979  | 1.83008   | -4.338745 |
| H  | -3.52659  | 2.32161   | -4.01356  |
| C  | -4.441725 | -2.319615 | 0.025175  |
| N  | -3.354165 | -4.13383  | 1.218565  |
| N  | -2.00355  | -4.277565 | 3.079425  |
| C  | -2.36854  | -3.73692  | 1.960895  |
| C  | -3.57865  | -3.507495 | -0.025175 |
| C  | -0.870865 | -3.69493  | 3.74262   |
| C  | -1.16166  | -3.250045 | 5.095515  |
| H  | -1.32791  | -4.036075 | 5.76555   |
| H  | -1.98379  | -2.610695 | 5.12183   |
| H  | -0.348745 | -2.69724  | 5.44692   |
| C  | 0.271035  | -4.59078  | 3.705285  |
| H  | 1.118245  | -4.071415 | 4.01356   |
| H  | 0.44574   | -4.929645 | 2.734765  |
| H  | 0.16454   | -5.415665 | 4.338745  |
| H  | -5.25236  | -2.50686  | 0.650085  |
| H  | -3.90659  | -1.52361  | 0.43852   |
| H  | -4.007195 | -4.220565 | -0.650085 |
| H  | -2.6562   | -3.244535 | -0.43852  |

|    |           |           |           |
|----|-----------|-----------|-----------|
| H  | -0.63213  | -2.84734  | 3.18003   |
| C  | -2.40084  | -5.45623  | 3.828975  |
| H  | -1.71152  | -5.434    | 4.60636   |
| C  | -2.117645 | -6.735785 | 3.18155   |
| C  | -3.676025 | -5.363795 | 4.53815   |
| H  | -3.737965 | -4.45911  | 5.053525  |
| H  | -4.53207  | -5.45775  | 3.953045  |
| H  | -3.70424  | -6.131965 | 5.246945  |
| H  | -2.774    | -7.014705 | 2.422405  |
| H  | -2.15973  | -7.484195 | 3.911245  |
| H  | -1.153015 | -6.73132  | 2.784165  |
| C  | -5.93104  | -0.597265 | -3.828975 |
| H  | -5.696865 | 0.051395  | -4.60636  |
| C  | -7.060495 | 0.067545  | -3.18155  |
| C  | -6.237225 | -1.83863  | -4.53815  |
| H  | -5.396    | -2.17702  | -5.053525 |
| H  | -6.5911   | -2.62371  | -3.953045 |
| H  | -6.976515 | -1.628015 | -5.246945 |
| H  | -7.52856  | -0.470535 | -2.422405 |
| H  | -7.785345 | 0.25878   | -3.911245 |
| H  | -6.758205 | 0.983535  | -2.784165 |
| C  | -4.23263  | -5.219775 | 1.48618   |
| H  | -3.860895 | -5.655065 | 2.339565  |
| C  | -4.20299  | -6.24777  | 0.453055  |
| C  | -5.591795 | -4.79978  | 1.79398   |
| H  | -5.60481  | -4.074835 | 2.54429   |
| H  | -6.093585 | -4.42795  | 0.9595    |
| H  | -6.13776  | -5.624855 | 2.13256   |
| H  | -4.720835 | -5.97759  | -0.4123   |
| H  | -4.66412  | -7.111605 | 0.817665  |
| H  | -3.22373  | -6.4904   | 0.18734   |
| C  | -6.27228  | -2.41243  | -1.48618  |
| H  | -6.57134  | -1.924415 | -2.339565 |
| C  | -7.240805 | -2.066535 | -0.453055 |
| C  | -6.2928   | -3.834865 | -1.79398  |
| H  | -5.607375 | -4.07132  | -2.54429  |
| H  | -6.09425  | -4.427    | -0.9595   |
| H  | -7.24622  | -4.09925  | -2.13256  |
| H  | -7.14381  | -2.642615 | 0.4123    |
| H  | -8.204865 | -2.2382   | -0.817665 |
| H  | -7.168985 | -1.060295 | -0.18734  |
| Au | -2.3997   | 0.616835  | 1.24165   |
| Au | -1.328195 | 2.091615  | -1.24165  |
| N  | -2.00355  | 4.277565  | -3.079425 |
| N  | -3.354165 | 4.13383   | -1.218565 |
| C  | -2.36854  | 3.73692   | -1.960895 |
| C  | -0.870865 | 3.69493   | -3.74262  |
| H  | -0.63213  | 2.84734   | -3.18003  |
| C  | -1.16166  | 3.250045  | -5.095515 |
| H  | -0.348745 | 2.69724   | -5.44692  |
| H  | -1.32791  | 4.036075  | -5.76555  |
| H  | -1.98379  | 2.610695  | -5.12183  |
| C  | 0.271035  | 4.59078   | -3.705285 |
| H  | 0.44574   | 4.929645  | -2.734765 |
| H  | 0.16454   | 5.415665  | -4.338745 |
| H  | 1.118245  | 4.071415  | -4.01356  |
| C  | -3.57865  | 3.507495  | 0.025175  |
| N  | -4.968025 | 1.91254   | 1.218565  |
| N  | -4.6873   | 0.583585  | 3.079425  |
| C  | -4.285925 | 1.09782   | 1.960895  |
| C  | -4.441725 | 2.319615  | -0.025175 |
| C  | -3.783185 | -0.313595 | 3.74262   |
| C  | -3.45002  | 0.10051   | 5.095515  |
| H  | -4.248875 | 0.015675  | 5.76555   |
| H  | -3.095955 | 1.079865  | 5.12183   |
| H  | -2.673015 | -0.50179  | 5.44692   |
| C  | -4.282315 | -1.67637  | 3.705285  |
| H  | -3.52659  | -2.32161  | 4.01356   |



|    |           |           |           |
|----|-----------|-----------|-----------|
| H  | -4.550595 | -1.947215 | 2.734765  |
| H  | -5.09979  | -1.83008  | 4.338745  |
| H  | -4.007195 | 4.220565  | 0.650085  |
| H  | -2.6562   | 3.244535  | 0.43852   |
| H  | -5.25236  | 2.50686   | -0.650085 |
| H  | -3.90659  | 1.52361   | -0.43852  |
| H  | -2.90339  | -0.27873  | 3.18003   |
| C  | -5.93104  | 0.597265  | 3.828975  |
| H  | -5.696865 | -0.051395 | 4.60636   |
| C  | -7.060495 | -0.067545 | 3.18155   |
| C  | -6.237225 | 1.83863   | 4.53815   |
| H  | -5.396    | 2.17702   | 5.053525  |
| H  | -6.5911   | 2.62371   | 3.953045  |
| H  | -6.976515 | 1.628015  | 5.246945  |
| H  | -7.52856  | 0.470535  | 2.422405  |
| H  | -7.785345 | -0.25878  | 3.911245  |
| H  | -6.758205 | -0.983535 | 2.784165  |
| C  | -2.40084  | 5.45623   | -3.828975 |
| H  | -1.71152  | 5.434     | -4.60636  |
| C  | -2.117645 | 6.735785  | -3.18155  |
| C  | -3.676025 | 5.363795  | -4.53815  |
| H  | -3.737965 | 4.45911   | -5.053525 |
| H  | -4.53207  | 5.45775   | -3.953045 |
| H  | -3.70424  | 6.131965  | -5.246945 |
| H  | -2.774    | 7.014705  | -2.422405 |
| H  | -2.15973  | 7.484195  | -3.911245 |
| H  | -1.153015 | 6.73132   | -2.784165 |
| C  | -6.27228  | 2.41243   | 1.48618   |
| H  | -6.57134  | 1.924415  | 2.339565  |
| C  | -7.240805 | 2.066535  | 0.453055  |
| C  | -6.2928   | 3.834865  | 1.79398   |
| H  | -5.607375 | 4.07132   | 2.54429   |
| H  | -6.09425  | 4.427     | 0.9595    |
| H  | -7.24622  | 4.09925   | 2.13256   |
| H  | -7.14381  | 2.642615  | -0.4123   |
| H  | -8.204865 | 2.2382    | 0.817665  |
| H  | -7.168985 | 1.060295  | 0.18734   |
| C  | -4.23263  | 5.219775  | -1.48618  |
| H  | -3.860895 | 5.655065  | -2.339565 |
| C  | -4.20299  | 6.24777   | -0.453055 |
| C  | -5.591795 | 4.79978   | -1.79398  |
| H  | -5.60481  | 4.074835  | -2.54429  |
| H  | -6.093585 | 4.42795   | -0.9595   |
| H  | -6.13776  | 5.624855  | -2.13256  |
| H  | -4.720835 | 5.97759   | 0.4123    |
| H  | -4.66412  | 7.111605  | -0.817665 |
| H  | -3.22373  | 6.4904    | -0.18734  |
| Au | -0.15485  | 2.47285   | 1.24165   |
| Au | 1.578805  | 1.909595  | -1.24165  |
| N  | 3.44907   | 3.22734   | -3.079425 |
| N  | 2.89503   | 4.467375  | -1.218565 |
| C  | 2.822165  | 3.407365  | -1.960895 |
| C  | 3.24501   | 1.970015  | -3.74262  |
| H  | 2.512655  | 1.48105   | -3.18003  |
| C  | 2.73201   | 2.10919   | -5.095515 |
| H  | 2.45746   | 1.165175  | -5.44692  |
| H  | 3.428265  | 2.51009   | -5.76555  |
| H  | 1.869885  | 2.69344   | -5.12183  |
| C  | 4.449895  | 1.1609    | -3.705285 |
| H  | 4.826095  | 1.099435  | -2.734765 |
| H  | 5.20144   | 1.517055  | -4.338745 |
| H  | 4.217715  | 0.194655  | -4.01356  |
| C  | 2.23003   | 4.48742   | 0.025175  |
| N  | 0.283765  | 5.315915  | 1.218565  |
| N  | -0.89338  | 4.63828   | 3.079425  |
| C  | -0.280345 | 4.41541   | 1.960895  |
| C  | 0.83353   | 4.94114   | -0.025175 |
| C  | -1.467275 | 3.50113   | 3.74262   |

|    |           |          |           |
|----|-----------|----------|-----------|
| C  | -0.97052  | 3.312175 | 5.095515  |
| H  | -1.29808  | 4.045765 | 5.76555   |
| H  | 0.070395  | 3.278165 | 5.12183   |
| H  | -1.303305 | 2.38716  | 5.44692   |
| C  | -2.91764  | 3.55471  | 3.705285  |
| H  | -3.297735 | 2.636535 | 4.01356   |
| H  | -3.25812  | 3.72609  | 2.734765  |
| H  | -3.316355 | 4.28469  | 4.338745  |
| H  | 2.77571   | 5.11537  | 0.650085  |
| H  | 2.26499   | 3.52887  | 0.43852   |
| H  | 0.761045  | 5.76992  | -0.650085 |
| H  | 0.24187   | 4.186175 | -0.43852  |
| Au | 0         | 0        | -2.597395 |
| Au | 0         | 0        | 0         |
| Au | 0         | 0        | 2.597395  |
| Cl | 0         | 0        | -4.864    |
| Cl | 0         | 0        | 4.864     |
| H  | -1.16223  | 2.675105 | 3.18003   |
| C  | -1.26483  | 5.825305 | 3.828975  |
| H  | -1.80937  | 5.402175 | 4.60636   |
| C  | -2.24599  | 6.69408  | 3.18155   |
| C  | -0.17879  | 6.500185 | 4.53815   |
| H  | 0.403085  | 5.804595 | 5.053525  |
| H  | 0.458565  | 7.079305 | 3.953045  |
| H  | -0.607525 | 7.138205 | 5.246945  |
| H  | -1.87891  | 7.3055   | 2.422405  |
| H  | -2.65183  | 7.32431  | 3.911245  |
| H  | -3.023755 | 6.12351  | 2.784165  |
| C  | 4.447235  | 3.969385 | -3.828975 |
| H  | 4.639135  | 3.30695  | -4.60636  |
| C  | 5.751775  | 4.09545  | -3.18155  |
| C  | 3.9653    | 5.153655 | -4.53815  |
| H  | 3.08579   | 4.93297  | -5.053525 |
| H  | 3.79012   | 5.99678  | -3.953045 |
| H  | 4.687205  | 5.41785  | -5.246945 |
| H  | 5.81419   | 4.80586  | -2.422405 |
| H  | 6.4505    | 4.36677  | -3.911245 |
| H  | 6.04561   | 3.176705 | -2.784165 |
| C  | 0.356155  | 6.710705 | 1.48618   |
| H  | -0.20045  | 6.84437  | 2.339565  |
| C  | -0.27208  | 7.525045 | 0.453055  |
| C  | 1.70259   | 7.16984  | 1.79398   |
| H  | 2.13921   | 6.591005 | 2.54429   |
| H  | 2.32712   | 7.164045 | 0.9595    |
| H  | 1.659365  | 8.158315 | 2.13256   |
| H  | 0.30571   | 7.610735 | -0.4123   |
| H  | -0.40679  | 8.4949   | 0.817665  |
| H  | -1.20688  | 7.14571  | 0.18734   |
| C  | 3.65636   | 5.63844  | -1.48618  |
| H  | 4.185225  | 5.419465 | -2.339565 |
| C  | 4.64322   | 5.927905 | -0.453055 |
| C  | 2.83689   | 6.801335 | -1.79398  |
| H  | 2.14339   | 6.589675 | -2.54429  |
| H  | 2.32826   | 7.163665 | -0.9595   |
| H  | 3.45287   | 7.575585 | -2.13256  |
| H  | 4.22617   | 6.336975 | 0.4123    |
| H  | 5.32228   | 6.63347  | -0.817665 |
| H  | 5.17655   | 5.071575 | -0.18734  |

275

4 Benzo S0 Ground State

|    |        |         |         |
|----|--------|---------|---------|
| Au | 2.2794 | 0.8265  | 1.2211  |
| Au | 2.2794 | -0.8265 | -1.2211 |
| N  | 4.3061 | -1.8214 | -3.1290 |
| N  | 5.1570 | -1.1766 | -1.3454 |
| C  | 4.0241 | -1.3589 | -1.9554 |
| C  | 5.6265 | -1.9144 | -3.2856 |
| C  | 6.1704 | -1.4947 | -2.1400 |
| C  | 3.3203 | -2.2463 | -4.0474 |

|    |         |         |         |
|----|---------|---------|---------|
| H  | 2.4252  | -2.0381 | -3.5535 |
| C  | 3.3506  | -1.4716 | -5.2732 |
| H  | 2.5614  | -1.7718 | -5.8842 |
| H  | 4.2378  | -1.6006 | -5.8029 |
| H  | 3.2167  | -0.4597 | -5.0729 |
| C  | 3.4160  | -3.6786 | -4.2701 |
| H  | 3.3693  | -4.2022 | -3.3706 |
| H  | 4.2990  | -3.9416 | -4.7550 |
| H  | 2.6232  | -3.9893 | -4.8698 |
| C  | 5.2650  | -0.7290 | -0.0399 |
| N  | 5.1570  | 1.1766  | 1.3454  |
| N  | 4.3061  | 1.8214  | 3.1290  |
| C  | 4.0241  | 1.3589  | 1.9554  |
| C  | 6.1704  | 1.4947  | 2.1400  |
| C  | 5.6265  | 1.9144  | 3.2856  |
| C  | 5.2650  | 0.7290  | 0.0399  |
| C  | 3.3203  | 2.2463  | 4.0474  |
| H  | 2.4252  | 2.0381  | 3.5535  |
| C  | 3.3506  | 1.4716  | 5.2732  |
| H  | 4.2378  | 1.6006  | 5.8029  |
| H  | 3.2167  | 0.4597  | 5.0729  |
| H  | 2.5614  | 1.7718  | 5.8842  |
| C  | 3.4160  | 3.6786  | 4.2701  |
| H  | 2.6232  | 3.9893  | 4.8698  |
| H  | 3.3693  | 4.2022  | 3.3706  |
| H  | 4.2990  | 3.9416  | 4.7550  |
| H  | 6.1281  | -1.1340 | 0.3778  |
| H  | 4.4419  | -1.0909 | 0.4853  |
| H  | 6.1281  | 1.1340  | -0.3778 |
| H  | 4.4419  | 1.0909  | -0.4853 |
| C  | 6.3967  | -2.3114 | -4.2933 |
| C  | 7.4847  | -1.4549 | -1.9605 |
| C  | 7.7061  | -2.2695 | -4.1149 |
| C  | 8.2433  | -1.8494 | -2.9685 |
| C  | 7.4847  | 1.4549  | 1.9605  |
| C  | 6.3967  | 2.3114  | 4.2933  |
| C  | 7.7061  | 2.2695  | 4.1149  |
| C  | 8.2433  | 1.8494  | 2.9685  |
| H  | 6.0030  | -2.6386 | -5.1895 |
| H  | 8.3274  | -2.5699 | -4.8839 |
| H  | 9.2718  | -1.8297 | -2.8674 |
| H  | 7.9057  | -1.1319 | -1.0724 |
| H  | 7.9057  | 1.1319  | 1.0724  |
| H  | 9.2718  | 1.8297  | 2.8674  |
| H  | 8.3274  | 2.5699  | 4.8839  |
| H  | 6.0030  | 2.6386  | 5.1895  |
| Au | -0.0817 | 2.4233  | 1.2211  |
| Au | 1.4905  | 1.9124  | -1.2211 |
| N  | 3.0630  | 3.5325  | -3.1290 |
| N  | 2.7126  | 4.5410  | -1.3454 |
| C  | 2.5359  | 3.4073  | -1.9554 |
| C  | 3.5594  | 4.7595  | -3.2856 |
| C  | 3.3283  | 5.4065  | -2.1400 |
| C  | 3.1623  | 2.4636  | -4.0474 |
| H  | 2.6878  | 1.6767  | -3.5535 |
| C  | 2.4350  | 2.7318  | -5.2732 |
| H  | 2.4766  | 1.8885  | -5.8842 |
| H  | 2.8318  | 3.5358  | -5.8029 |
| H  | 1.4313  | 2.9173  | -5.0729 |
| C  | 4.5541  | 2.1121  | -4.2701 |
| H  | 5.0378  | 1.9058  | -3.3706 |
| H  | 5.0771  | 2.8706  | -4.7550 |
| H  | 4.6047  | 1.2621  | -4.8698 |
| C  | 2.3203  | 4.7820  | -0.0399 |
| N  | 0.4746  | 5.2681  | 1.3454  |
| N  | -0.4017 | 4.6581  | 3.1290  |
| C  | -0.0488 | 4.2471  | 1.9554  |
| C  | 0.4853  | 6.3303  | 2.1400  |

|    |         |         |         |
|----|---------|---------|---------|
| C  | -0.0821 | 5.9426  | 3.2856  |
| C  | 0.9337  | 5.2326  | 0.0399  |
| C  | -1.1103 | 3.8519  | 4.0474  |
| H  | -1.1890 | 2.9363  | 3.5535  |
| C  | -0.3642 | 3.6414  | 5.2732  |
| H  | -0.2126 | 4.5249  | 5.8029  |
| H  | 0.5568  | 3.2014  | 5.0729  |
| H  | -0.8935 | 2.9836  | 5.8842  |
| C  | -2.4429 | 4.3856  | 4.2701  |
| H  | -2.9835 | 3.7276  | 4.8698  |
| H  | -2.9555 | 4.5030  | 3.3706  |
| H  | -2.4201 | 5.3067  | 4.7550  |
| H  | 2.9722  | 5.4777  | 0.3778  |
| H  | 2.4102  | 3.8874  | 0.4853  |
| H  | 0.8152  | 6.1785  | -0.3778 |
| H  | 0.3351  | 4.5616  | -0.4853 |
| C  | 4.1750  | 5.3694  | -4.2933 |
| C  | 3.6966  | 6.6687  | -1.9605 |
| C  | 4.5397  | 6.6277  | -4.1149 |
| C  | 4.3062  | 7.2685  | -2.9685 |
| C  | 0.9292  | 7.5679  | 1.9605  |
| C  | -0.2215 | 6.7979  | 4.2933  |
| C  | 0.2230  | 8.0303  | 4.1149  |
| C  | 0.7885  | 8.4114  | 2.9685  |
| H  | 4.3645  | 4.8937  | -5.1895 |
| H  | 5.0174  | 7.1257  | -4.8839 |
| H  | 4.6053  | 8.2526  | -2.8674 |
| H  | 3.5196  | 7.1690  | -1.0724 |
| H  | 1.3665  | 7.8686  | 1.0724  |
| H  | 1.1250  | 9.3834  | 2.8674  |
| H  | 0.1291  | 8.7140  | 4.8839  |
| H  | -0.6545 | 6.5245  | 5.1895  |
| Au | -2.3299 | 0.6711  | 1.2211  |
| Au | -1.3582 | 2.0085  | -1.2211 |
| N  | -2.4131 | 4.0046  | -3.1290 |
| N  | -3.4805 | 3.9831  | -1.3454 |
| C  | -2.4569 | 3.4647  | -1.9554 |
| C  | -3.4267 | 4.8559  | -3.2856 |
| C  | -4.1134 | 4.8362  | -2.1400 |
| C  | -1.3658 | 3.7688  | -4.0474 |
| H  | -0.7640 | 3.0744  | -3.5535 |
| C  | -1.8457 | 3.1601  | -5.2732 |
| H  | -1.0308 | 2.9389  | -5.8842 |
| H  | -2.4877 | 3.7858  | -5.8029 |
| H  | -2.3322 | 2.2627  | -5.0729 |
| C  | -0.6014 | 4.9839  | -4.2701 |
| H  | -0.2558 | 5.3801  | -3.3706 |
| H  | -1.1613 | 5.7157  | -4.7550 |
| H  | 0.2227  | 4.7694  | -4.8698 |
| C  | -3.8310 | 3.6845  | -0.0399 |
| N  | -4.8636 | 2.0793  | 1.3454  |
| N  | -4.5543 | 1.0574  | 3.1290  |
| C  | -4.0543 | 1.2660  | 1.9554  |
| C  | -5.8706 | 2.4177  | 2.1400  |
| C  | -5.6771 | 1.7584  | 3.2856  |
| C  | -4.6880 | 2.5050  | 0.0399  |
| C  | -4.0064 | 0.1343  | 4.0474  |
| H  | -3.1600 | -0.2234 | 3.5535  |
| C  | -3.5757 | 0.7788  | 5.2732  |
| H  | -4.3692 | 1.1961  | 5.8029  |
| H  | -2.8726 | 1.5189  | 5.0729  |
| H  | -3.1136 | 0.0722  | 5.8842  |
| C  | -4.9258 | -0.9681 | 4.2701  |
| H  | -4.4672 | -1.6856 | 4.8698  |
| H  | -5.1958 | -1.4193 | 3.3706  |
| H  | -5.7948 | -0.6619 | 4.7550  |
| H  | -4.2912 | 4.5194  | 0.3778  |
| H  | -2.9523 | 3.4934  | 0.4853  |

|    |         |         |         |
|----|---------|---------|---------|
| H  | -5.6243 | 2.6845  | -0.3778 |
| H  | -4.2348 | 1.7283  | -0.4853 |
| C  | -3.8165 | 5.6298  | -4.2933 |
| C  | -5.2000 | 5.5764  | -1.9605 |
| C  | -4.9005 | 6.3656  | -4.1149 |
| C  | -5.5820 | 6.3414  | -2.9685 |
| C  | -6.9104 | 3.2223  | 1.9605  |
| C  | -6.5336 | 1.8900  | 4.2933  |
| C  | -7.5684 | 2.6935  | 4.1149  |
| C  | -7.7560 | 3.3492  | 2.9685  |
| H  | -3.3055 | 5.6631  | -5.1895 |
| H  | -5.2264 | 6.9739  | -4.8839 |
| H  | -6.4255 | 6.9301  | -2.8674 |
| H  | -5.7305 | 5.5626  | -1.0724 |
| H  | -7.0612 | 3.7311  | 1.0724  |
| H  | -8.5765 | 3.9696  | 2.8674  |
| H  | -8.2475 | 2.8156  | 4.8839  |
| H  | -6.4075 | 1.3937  | 5.1895  |
| Au | -1.3582 | -2.0085 | 1.2211  |
| Au | -2.3299 | -0.6711 | -1.2211 |
| N  | -4.5543 | -1.0574 | -3.1290 |
| N  | -4.8636 | -2.0793 | -1.3454 |
| C  | -4.0543 | -1.2660 | -1.9554 |
| C  | -5.6771 | -1.7584 | -3.2856 |
| C  | -5.8706 | -2.4177 | -2.1400 |
| C  | -4.0064 | -0.1343 | -4.0474 |
| H  | -3.1600 | 0.2234  | -3.5535 |
| C  | -3.5757 | -0.7788 | -5.2732 |
| H  | -3.1136 | -0.0722 | -5.8842 |
| H  | -4.3692 | -1.1961 | -5.8029 |
| H  | -2.8726 | -1.5189 | -5.0729 |
| C  | -4.9258 | 0.9681  | -4.2701 |
| H  | -5.1958 | 1.4193  | -3.3706 |
| H  | -5.7948 | 0.6619  | -4.7550 |
| H  | -4.4672 | 1.6856  | -4.8698 |
| C  | -4.6880 | -2.5050 | -0.0399 |
| N  | -3.4805 | -3.9831 | 1.3454  |
| N  | -2.4131 | -4.0046 | 3.1290  |
| C  | -2.4569 | -3.4647 | 1.9554  |
| C  | -4.1134 | -4.8362 | 2.1400  |
| C  | -3.4267 | -4.8559 | 3.2856  |
| C  | -3.8310 | -3.6845 | 0.0399  |
| C  | -1.3658 | -3.7688 | 4.0474  |
| H  | -0.7640 | -3.0744 | 3.5535  |
| C  | -1.8457 | -3.1601 | 5.2732  |
| H  | -2.4877 | -3.7858 | 5.8029  |
| H  | -2.3322 | -2.2627 | 5.0729  |
| H  | -1.0308 | -2.9389 | 5.8842  |
| C  | -0.6014 | -4.9839 | 4.2701  |
| H  | 0.2227  | -4.7694 | 4.8698  |
| H  | -0.2558 | -5.3801 | 3.3706  |
| H  | -1.1613 | -5.7157 | 4.7550  |
| H  | -5.6243 | -2.6845 | 0.3778  |
| H  | -4.2348 | -1.7283 | 0.4853  |
| H  | -4.2912 | -4.5194 | -0.3778 |
| H  | -2.9523 | -3.4934 | -0.4853 |
| C  | -6.5336 | -1.8900 | -4.2933 |
| C  | -6.9104 | -3.2223 | -1.9605 |
| C  | -7.5684 | -2.6935 | -4.1149 |
| C  | -7.7560 | -3.3492 | -2.9685 |
| C  | -5.2000 | -5.5764 | 1.9605  |
| C  | -3.8165 | -5.6298 | 4.2933  |
| C  | -4.9005 | -6.3656 | 4.1149  |
| C  | -5.5820 | -6.3414 | 2.9685  |
| H  | -6.4075 | -1.3937 | -5.1895 |
| H  | -8.2475 | -2.8156 | -4.8839 |
| H  | -8.5765 | -3.9696 | -2.8674 |
| H  | -7.0612 | -3.7311 | -1.0724 |

|                          |         |         |         |
|--------------------------|---------|---------|---------|
| H                        | -5.7305 | -5.5626 | 1.0724  |
| H                        | -6.4255 | -6.9301 | 2.8674  |
| H                        | -5.2264 | -6.9739 | 4.8839  |
| H                        | -3.3055 | -5.6631 | 5.1895  |
| Au                       | 1.4905  | -1.9124 | 1.2211  |
| Au                       | -0.0817 | -2.4233 | -1.2211 |
| N                        | -0.4017 | -4.6581 | -3.1290 |
| N                        | 0.4746  | -5.2681 | -1.3454 |
| C                        | -0.0488 | -4.2471 | -1.9554 |
| C                        | -0.0821 | -5.9426 | -3.2856 |
| C                        | 0.4853  | -6.3303 | -2.1400 |
| C                        | -1.1103 | -3.8519 | -4.0474 |
| H                        | -1.1890 | -2.9363 | -3.5535 |
| C                        | -0.3642 | -3.6414 | -5.2732 |
| H                        | -0.8935 | -2.9836 | -5.8842 |
| H                        | -0.2126 | -4.5249 | -5.8029 |
| H                        | 0.5568  | -3.2014 | -5.0729 |
| C                        | -2.4429 | -4.3856 | -4.2701 |
| H                        | -2.9555 | -4.5030 | -3.3706 |
| H                        | -2.4201 | -5.3067 | -4.7550 |
| H                        | -2.9835 | -3.7276 | -4.8698 |
| C                        | 0.9337  | -5.2326 | -0.0399 |
| N                        | 2.7126  | -4.5410 | 1.3454  |
| N                        | 3.0630  | -3.5325 | 3.1290  |
| C                        | 2.5359  | -3.4073 | 1.9554  |
| C                        | 3.3283  | -5.4065 | 2.1400  |
| C                        | 3.5594  | -4.7595 | 3.2856  |
| C                        | 2.3203  | -4.7820 | 0.0399  |
| C                        | 3.1623  | -2.4636 | 4.0474  |
| H                        | 2.6878  | -1.6767 | 3.5535  |
| C                        | 2.4350  | -2.7318 | 5.2732  |
| H                        | 2.8318  | -3.5358 | 5.8029  |
| H                        | 1.4313  | -2.9173 | 5.0729  |
| H                        | 2.4766  | -1.8885 | 5.8842  |
| C                        | 4.5541  | -2.1121 | 4.2701  |
| H                        | 4.6047  | -1.2621 | 4.8698  |
| H                        | 5.0378  | -1.9058 | 3.3706  |
| H                        | 5.0771  | -2.8706 | 4.7550  |
| H                        | 0.8152  | -6.1785 | 0.3778  |
| H                        | 0.3351  | -4.5616 | 0.4853  |
| H                        | 2.9722  | -5.4777 | -0.3778 |
| H                        | 2.4102  | -3.8874 | -0.4853 |
| Au                       | 0.0000  | 0.0000  | -2.6491 |
| Au                       | 0.0000  | 0.0000  | 0.0000  |
| Au                       | 0.0000  | 0.0000  | 2.6491  |
| Cl                       | 0.0000  | 0.0000  | -4.8955 |
| Cl                       | 0.0000  | 0.0000  | 4.8955  |
| C                        | -0.2215 | -6.7979 | -4.2933 |
| C                        | 0.9292  | -7.5679 | -1.9605 |
| C                        | 0.2230  | -8.0303 | -4.1149 |
| C                        | 0.7885  | -8.4114 | -2.9685 |
| C                        | 3.6966  | -6.6687 | 1.9605  |
| C                        | 4.1750  | -5.3694 | 4.2933  |
| C                        | 4.5397  | -6.6277 | 4.1149  |
| C                        | 4.3062  | -7.2685 | 2.9685  |
| H                        | -0.6545 | -6.5245 | -5.1895 |
| H                        | 0.1291  | -8.7140 | -4.8839 |
| H                        | 1.1250  | -9.3834 | -2.8674 |
| H                        | 1.3665  | -7.8686 | -1.0724 |
| H                        | 3.5196  | -7.1690 | 1.0724  |
| H                        | 4.6053  | -8.2526 | 2.8674  |
| H                        | 5.0174  | -7.1257 | 4.8839  |
| H                        | 4.3645  | -4.8937 | 5.1895  |
| 255                      |         |         |         |
| 5 BenzoN S0 Ground State |         |         |         |
| Au                       | 2.2776  | 0.8139  | 1.2215  |
| Au                       | 2.2776  | -0.8139 | -1.2215 |
| N                        | 4.2717  | -1.7775 | -3.1604 |

|    |         |         |         |
|----|---------|---------|---------|
| N  | 5.1548  | -1.1396 | -1.3707 |
| C  | 4.0114  | -1.3273 | -1.9723 |
| C  | 5.5845  | -1.8541 | -3.3281 |
| C  | 6.1446  | -1.4405 | -2.1893 |
| C  | 3.2914  | -2.2096 | -4.0873 |
| H  | 2.3906  | -2.0003 | -3.6048 |
| C  | 3.3571  | -1.4500 | -5.3188 |
| H  | 2.5915  | -1.7665 | -5.9503 |
| H  | 4.2676  | -1.5933 | -5.8022 |
| H  | 3.2086  | -0.4359 | -5.1399 |
| C  | 3.4212  | -3.6398 | -4.2994 |
| H  | 3.3636  | -4.1629 | -3.4001 |
| H  | 4.3253  | -3.8677 | -4.7627 |
| H  | 2.6513  | -3.9671 | -4.9199 |
| C  | 5.3026  | -0.7270 | -0.0544 |
| N  | 5.1548  | 1.1396  | 1.3707  |
| N  | 4.2717  | 1.7775  | 3.1604  |
| C  | 4.0114  | 1.3273  | 1.9723  |
| C  | 6.1446  | 1.4405  | 2.1893  |
| C  | 5.5845  | 1.8541  | 3.3281  |
| C  | 5.3026  | 0.7270  | 0.0544  |
| C  | 3.2914  | 2.2096  | 4.0873  |
| H  | 2.3906  | 2.0003  | 3.6048  |
| C  | 3.3571  | 1.4500  | 5.3188  |
| H  | 4.2676  | 1.5933  | 5.8022  |
| H  | 3.2086  | 0.4359  | 5.1399  |
| H  | 2.5915  | 1.7665  | 5.9503  |
| C  | 3.4212  | 3.6398  | 4.2994  |
| H  | 2.6513  | 3.9671  | 4.9199  |
| H  | 3.3636  | 4.1629  | 3.4001  |
| H  | 4.3253  | 3.8677  | 4.7627  |
| H  | 6.1961  | -1.1239 | 0.3016  |
| H  | 4.5031  | -1.1162 | 0.4863  |
| H  | 6.1961  | 1.1239  | -0.3016 |
| H  | 4.5031  | 1.1162  | -0.4863 |
| N  | 6.2520  | -2.2267 | -4.3311 |
| N  | 7.3827  | -1.3683 | -1.9878 |
| C  | 7.5146  | -2.1574 | -4.1433 |
| C  | 8.0679  | -1.7387 | -3.0017 |
| N  | 7.3827  | 1.3683  | 1.9878  |
| N  | 6.2520  | 2.2267  | 4.3311  |
| C  | 7.5146  | 2.1574  | 4.1433  |
| C  | 8.0679  | 1.7387  | 3.0017  |
| H  | 8.1170  | -2.4464 | -4.9339 |
| H  | 9.0979  | -1.7080 | -2.9054 |
| H  | 9.0979  | 1.7080  | 2.9054  |
| H  | 8.1170  | 2.4464  | 4.9339  |
| Au | -0.0702 | 2.4177  | 1.2215  |
| Au | 1.4778  | 1.9147  | -1.2215 |
| N  | 3.0106  | 3.5133  | -3.1604 |
| N  | 2.6767  | 4.5503  | -1.3707 |
| C  | 2.5020  | 3.4049  | -1.9723 |
| C  | 3.4891  | 4.7382  | -3.3281 |
| C  | 3.2688  | 5.3988  | -2.1893 |
| C  | 3.1186  | 2.4475  | -4.0873 |
| H  | 2.6411  | 1.6555  | -3.6048 |
| C  | 2.4164  | 2.7447  | -5.3188 |
| H  | 2.4808  | 1.9188  | -5.9503 |
| H  | 2.8341  | 3.5663  | -5.8022 |
| H  | 1.4060  | 2.9169  | -5.1399 |
| C  | 4.5189  | 2.1290  | -4.2994 |
| H  | 4.9986  | 1.9125  | -3.4001 |
| H  | 5.0151  | 2.9183  | -4.7627 |
| H  | 4.5922  | 1.2956  | -4.9199 |
| C  | 2.3301  | 4.8184  | -0.0544 |
| N  | 0.5091  | 5.2546  | 1.3707  |
| N  | -0.3705 | 4.6119  | 3.1604  |
| C  | -0.0228 | 4.2252  | 1.9723  |

|    |         |         |         |
|----|---------|---------|---------|
| C  | 0.5289  | 6.2890  | 2.1893  |
| C  | -0.0377 | 5.8841  | 3.3281  |
| C  | 0.9472  | 5.2678  | 0.0544  |
| C  | -1.0844 | 3.8131  | 4.0873  |
| H  | -1.1637 | 2.8917  | 3.6048  |
| C  | -0.3416 | 3.6409  | 5.3188  |
| H  | -0.1967 | 4.5511  | 5.8022  |
| H  | 0.5770  | 3.1863  | 5.1399  |
| H  | -0.8792 | 3.0106  | 5.9503  |
| C  | -2.4045 | 4.3786  | 4.2994  |
| H  | -2.9536 | 3.7474  | 4.9199  |
| H  | -2.9197 | 4.4854  | 3.4001  |
| H  | -2.3418 | 5.3087  | 4.7627  |
| H  | 2.9837  | 5.5455  | 0.3016  |
| H  | 2.4530  | 3.9378  | 0.4863  |
| H  | 0.8458  | 6.2402  | -0.3016 |
| H  | 0.3300  | 4.6275  | -0.4863 |
| N  | 4.0498  | 5.2579  | -4.3311 |
| N  | 3.5827  | 6.5985  | -1.9878 |
| C  | 4.3739  | 6.4801  | -4.1433 |
| C  | 4.1468  | 7.1356  | -3.0017 |
| N  | 0.9800  | 7.4442  | 1.9878  |
| N  | -0.1858 | 6.6340  | 4.3311  |
| C  | 0.2704  | 7.8135  | 4.1433  |
| C  | 0.8395  | 8.2103  | 3.0017  |
| H  | 4.8350  | 6.9637  | -4.9339 |
| H  | 4.4358  | 8.1248  | -2.9054 |
| H  | 1.1870  | 9.1804  | 2.9054  |
| H  | 0.1815  | 8.4757  | 4.9339  |
| Au | -2.3210 | 0.6804  | 1.2215  |
| Au | -1.3643 | 1.9972  | -1.2215 |
| N  | -2.4110 | 3.9489  | -3.1604 |
| N  | -3.5005 | 3.9518  | -1.3707 |
| C  | -2.4651 | 3.4317  | -1.9723 |
| C  | -3.4281 | 4.7825  | -3.3281 |
| C  | -4.1244 | 4.7771  | -2.1893 |
| C  | -1.3640 | 3.7223  | -4.0873 |
| H  | -0.7583 | 3.0234  | -3.6048 |
| C  | -1.8637 | 3.1463  | -5.3188 |
| H  | -1.0582 | 2.9524  | -5.9503 |
| H  | -2.5160 | 3.7974  | -5.8022 |
| H  | -2.3397 | 2.2386  | -5.1399 |
| C  | -0.6284 | 4.9556  | -4.2994 |
| H  | -0.2743 | 5.3450  | -3.4001 |
| H  | -1.2258 | 5.6714  | -4.7627 |
| H  | 0.1869  | 4.7678  | -4.9199 |
| C  | -3.8626 | 3.7050  | -0.0544 |
| N  | -4.8402 | 2.1080  | 1.3707  |
| N  | -4.5006 | 1.0727  | 3.1604  |
| C  | -4.0255 | 1.2840  | 1.9723  |
| C  | -5.8178 | 2.4463  | 2.1893  |
| C  | -5.6078 | 1.7825  | 3.3281  |
| C  | -4.7172 | 2.5286  | 0.0544  |
| C  | -3.9616 | 0.1470  | 4.0873  |
| H  | -3.1097 | -0.2132 | 3.6048  |
| C  | -3.5683 | 0.8002  | 5.3188  |
| H  | -4.3891 | 1.2193  | 5.8022  |
| H  | -2.8520 | 1.5334  | 5.1399  |
| H  | -3.1349 | 0.0941  | 5.9503  |
| C  | -4.9072 | -0.9338 | 4.2994  |
| H  | -4.4767 | -1.6511 | 4.9199  |
| H  | -5.1681 | -1.3908 | 3.4001  |
| H  | -5.7726 | -0.5868 | 4.7627  |
| H  | -4.3521 | 4.5513  | 0.3016  |
| H  | -2.9870 | 3.5498  | 0.4863  |
| H  | -5.6734 | 2.7327  | -0.3016 |
| H  | -4.2991 | 1.7439  | -0.4863 |
| N  | -3.7491 | 5.4763  | -4.3311 |



|    |         |         |         |
|----|---------|---------|---------|
| N  | -5.1685 | 5.4464  | -1.9878 |
| C  | -4.8114 | 6.1623  | -4.1433 |
| C  | -5.5051 | 6.1488  | -3.0017 |
| N  | -6.7770 | 3.2325  | 1.9878  |
| N  | -6.3668 | 1.8733  | 4.3311  |
| C  | -7.3475 | 2.6717  | 4.1433  |
| C  | -7.5490 | 3.3355  | 3.0017  |
| H  | -5.1288 | 6.7503  | -4.9339 |
| H  | -6.3564 | 6.7294  | -2.9054 |
| H  | -8.3643 | 3.9658  | 2.9054  |
| H  | -8.0048 | 2.7918  | 4.9339  |
| Au | -1.3643 | -1.9972 | 1.2215  |
| Au | -2.3210 | -0.6804 | -1.2215 |
| N  | -4.5006 | -1.0727 | -3.1604 |
| N  | -4.8402 | -2.1080 | -1.3707 |
| C  | -4.0255 | -1.2840 | -1.9723 |
| C  | -5.6078 | -1.7825 | -3.3281 |
| C  | -5.8178 | -2.4463 | -2.1893 |
| C  | -3.9616 | -0.1470 | -4.0873 |
| H  | -3.1097 | 0.2132  | -3.6048 |
| C  | -3.5683 | -0.8002 | -5.3188 |
| H  | -3.1349 | -0.0941 | -5.9503 |
| H  | -4.3891 | -1.2193 | -5.8022 |
| H  | -2.8520 | -1.5334 | -5.1399 |
| C  | -4.9072 | 0.9338  | -4.2994 |
| H  | -5.1681 | 1.3908  | -3.4001 |
| H  | -5.7726 | 0.5868  | -4.7627 |
| H  | -4.4767 | 1.6511  | -4.9199 |
| C  | -4.7172 | -2.5286 | -0.0544 |
| N  | -3.5005 | -3.9518 | 1.3707  |
| N  | -2.4110 | -3.9489 | 3.1604  |
| C  | -2.4651 | -3.4317 | 1.9723  |
| C  | -4.1244 | -4.7771 | 2.1893  |
| C  | -3.4281 | -4.7825 | 3.3281  |
| C  | -3.8626 | -3.7050 | 0.0544  |
| C  | -1.3640 | -3.7223 | 4.0873  |
| H  | -0.7583 | -3.0234 | 3.6048  |
| C  | -1.8637 | -3.1463 | 5.3188  |
| H  | -2.5160 | -3.7974 | 5.8022  |
| H  | -2.3397 | -2.2386 | 5.1399  |
| H  | -1.0582 | -2.9524 | 5.9503  |
| C  | -0.6284 | -4.9556 | 4.2994  |
| H  | 0.1869  | -4.7678 | 4.9199  |
| H  | -0.2743 | -5.3450 | 3.4001  |
| H  | -1.2258 | -5.6714 | 4.7627  |
| H  | -5.6734 | -2.7327 | 0.3016  |
| H  | -4.2991 | -1.7439 | 0.4863  |
| H  | -4.3521 | -4.5513 | -0.3016 |
| H  | -2.9870 | -3.5498 | -0.4863 |
| N  | -6.3668 | -1.8733 | -4.3311 |
| N  | -6.7770 | -3.2325 | -1.9878 |
| C  | -7.3475 | -2.6717 | -4.1433 |
| C  | -7.5490 | -3.3355 | -3.0017 |
| N  | -5.1685 | -5.4464 | 1.9878  |
| N  | -3.7491 | -5.4763 | 4.3311  |
| C  | -4.8114 | -6.1623 | 4.1433  |
| C  | -5.5051 | -6.1488 | 3.0017  |
| H  | -8.0048 | -2.7918 | -4.9339 |
| H  | -8.3643 | -3.9658 | -2.9054 |
| H  | -6.3564 | -6.7294 | 2.9054  |
| H  | -5.1288 | -6.7503 | 4.9339  |
| Au | 1.4778  | -1.9147 | 1.2215  |
| Au | -0.0702 | -2.4177 | -1.2215 |
| N  | -0.3705 | -4.6119 | -3.1604 |
| N  | 0.5091  | -5.2546 | -1.3707 |
| C  | -0.0228 | -4.2252 | -1.9723 |
| C  | -0.0377 | -5.8841 | -3.3281 |
| C  | 0.5289  | -6.2890 | -2.1893 |

|    |         |         |         |
|----|---------|---------|---------|
| C  | -1.0844 | -3.8131 | -4.0873 |
| H  | -1.1637 | -2.8917 | -3.6048 |
| C  | -0.3416 | -3.6409 | -5.3188 |
| H  | -0.8792 | -3.0106 | -5.9503 |
| H  | -0.1967 | -4.5511 | -5.8022 |
| H  | 0.5770  | -3.1863 | -5.1399 |
| C  | -2.4045 | -4.3786 | -4.2994 |
| H  | -2.9197 | -4.4854 | -3.4001 |
| H  | -2.3418 | -5.3087 | -4.7627 |
| H  | -2.9536 | -3.7474 | -4.9199 |
| C  | 0.9472  | -5.2678 | -0.0544 |
| N  | 2.6767  | -4.5503 | 1.3707  |
| N  | 3.0106  | -3.5133 | 3.1604  |
| C  | 2.5020  | -3.4049 | 1.9723  |
| C  | 3.2688  | -5.3988 | 2.1893  |
| C  | 3.4891  | -4.7382 | 3.3281  |
| C  | 2.3301  | -4.8184 | 0.0544  |
| C  | 3.1186  | -2.4475 | 4.0873  |
| H  | 2.6411  | -1.6555 | 3.6048  |
| C  | 2.4164  | -2.7447 | 5.3188  |
| H  | 2.8341  | -3.5663 | 5.8022  |
| H  | 1.4060  | -2.9169 | 5.1399  |
| H  | 2.4808  | -1.9188 | 5.9503  |
| C  | 4.5189  | -2.1290 | 4.2994  |
| H  | 4.5922  | -1.2956 | 4.9199  |
| H  | 4.9986  | -1.9125 | 3.4001  |
| H  | 5.0151  | -2.9183 | 4.7627  |
| H  | 0.8458  | -6.2402 | 0.3016  |
| H  | 0.3300  | -4.6275 | 0.4863  |
| H  | 2.9837  | -5.5455 | -0.3016 |
| H  | 2.4530  | -3.9378 | -0.4863 |
| Au | 0.0000  | 0.0000  | -2.6502 |
| Au | 0.0000  | 0.0000  | 0.0000  |
| Au | 0.0000  | 0.0000  | 2.6502  |
| Cl | 0.0000  | 0.0000  | -4.8868 |
| Cl | 0.0000  | 0.0000  | 4.8868  |
| N  | -0.1858 | -6.6340 | -4.3311 |
| N  | 0.9800  | -7.4442 | -1.9878 |
| C  | 0.2704  | -7.8135 | -4.1433 |
| C  | 0.8395  | -8.2103 | -3.0017 |
| N  | 3.5827  | -6.5985 | 1.9878  |
| N  | 4.0498  | -5.2579 | 4.3311  |
| C  | 4.3739  | -6.4801 | 4.1433  |
| C  | 4.1468  | -7.1356 | 3.0017  |
| H  | 0.1815  | -8.4757 | -4.9339 |
| H  | 1.1870  | -9.1804 | -2.9054 |
| H  | 4.4358  | -8.1248 | 2.9054  |
| H  | 4.8350  | -6.9637 | 4.9339  |

215

6 NHC-O S0 Ground State

|    |           |          |           |
|----|-----------|----------|-----------|
| Au | -1.485325 | 1.898575 | 1.227115  |
| Au | 0.093195  | 2.41224  | -1.228825 |
| N  | 0.50521   | 4.619945 | -3.10156  |
| N  | -0.415435 | 5.24077  | -1.298745 |
| C  | 0.085405  | 4.2256   | -1.94712  |
| C  | 0.268185  | 5.943675 | -3.284245 |
| O  | 0.51433   | 6.581315 | -4.19976  |
| C  | -0.37297  | 6.369845 | -2.033665 |
| O  | -0.751355 | 7.404015 | -1.726435 |
| C  | 1.190825  | 3.805985 | -4.046335 |
| H  | 1.225785  | 2.870615 | -3.579125 |
| C  | 0.4408    | 3.69132  | -5.282285 |
| H  | 0.95418   | 3.052825 | -5.928475 |
| H  | 0.335825  | 4.6151   | -5.75472  |
| H  | -0.499035 | 3.27237  | -5.113945 |
| C  | 2.5384    | 4.31224  | -4.24593  |
| H  | 3.058145  | 4.38634  | -3.34248  |
| H  | 2.5308    | 5.24894  | -4.703925 |

|    |           |           |           |
|----|-----------|-----------|-----------|
| H  | 3.05748   | 3.65997   | -4.87331  |
| C  | -0.907725 | 5.212555  | -0.00057  |
| N  | -2.716335 | 4.494545  | 1.337505  |
| N  | -3.11524  | 3.419715  | 3.11714   |
| C  | -2.536595 | 3.36547   | 1.965835  |
| C  | -3.4219   | 5.370255  | 2.080595  |
| O  | -3.72039  | 6.434445  | 1.78923   |
| C  | -3.704335 | 4.626025  | 3.314645  |
| O  | -4.290295 | 4.978475  | 4.22997   |
| C  | -2.30128  | 4.7766    | 0.04237   |
| C  | -3.197225 | 2.34555   | 4.046145  |
| H  | -2.67767  | 1.57282   | 3.569245  |
| C  | -2.523865 | 2.67577   | 5.28713   |
| H  | -2.97749  | 3.48346   | 5.76593   |
| H  | -1.51525  | 2.882965  | 5.12392   |
| H  | -2.57127  | 1.851645  | 5.925055  |
| C  | -4.5866   | 1.96517   | 4.237475  |
| H  | -4.62726  | 1.12328   | 4.851935  |
| H  | -5.04925  | 1.73489   | 3.32975   |
| H  | -5.12943  | 2.72213   | 4.70592   |
| H  | -0.81453  | 6.179655  | 0.379335  |
| H  | -0.313025 | 4.558575  | 0.55309   |
| H  | -2.930655 | 5.525105  | -0.320625 |
| H  | -2.41984  | 3.91096   | -0.52763  |
| Au | 2.32237   | -0.65531  | 1.2274    |
| Au | 1.34235   | -2.00127  | -1.22683  |
| N  | 2.29406   | -4.032275 | -3.102415 |
| N  | 3.414395  | -3.992185 | -1.30682  |
| C  | 2.410815  | -3.46351  | -1.95073  |
| C  | 3.261635  | -4.965555 | -3.288995 |
| O  | 3.43178   | -5.626945 | -4.2047   |
| C  | 4.036835  | -4.934015 | -2.042405 |
| O  | 4.94931   | -5.551705 | -1.737645 |
| C  | 1.25457   | -3.779575 | -4.040825 |
| H  | 0.67678   | -3.04589  | -3.569625 |
| C  | 1.785335  | -3.24425  | -5.279625 |
| H  | 0.99123   | -3.041235 | -5.925625 |
| H  | 2.420125  | -3.92445  | -5.750065 |
| H  | 2.289405  | -2.3465   | -5.11575  |
| C  | 0.46474   | -4.9837   | -4.23548  |
| H  | 0.096615  | -5.35135  | -3.32918  |
| H  | 1.020585  | -5.73439  | -4.69832  |
| H  | -0.344565 | -4.764155 | -4.8564   |
| C  | 3.805415  | -3.675455 | -0.013015 |
| N  | 4.84842   | -2.024925 | 1.31176   |
| N  | 4.54575   | -0.942115 | 3.10517   |
| C  | 4.04016   | -1.22683  | 1.95339   |
| C  | 5.934555  | -2.33016  | 2.047915  |
| O  | 6.800575  | -3.012165 | 1.744295  |
| C  | 5.72907   | -1.579375 | 3.292795  |
| O  | 6.4106    | -1.53748  | 4.2085    |
| C  | 4.66545   | -2.49527  | 0.018525  |
| C  | 3.98924   | -0.029545 | 4.044435  |
| H  | 3.113055  | 0.296495  | 3.57504   |
| C  | 3.6442    | -0.698915 | 5.283805  |
| H  | 4.488085  | -1.088035 | 5.757095  |
| H  | 2.94956   | -1.458915 | 5.11974   |
| H  | 3.201215  | -0.007315 | 5.92724   |
| C  | 4.89592   | 1.08965   | 4.237665  |
| H  | 4.442105  | 1.79246   | 4.860675  |
| H  | 5.131235  | 1.553725  | 3.331745  |
| H  | 5.781795  | 0.7885    | 4.697845  |
| H  | 4.310625  | -4.50737  | 0.362615  |
| H  | 2.944145  | -3.50341  | 0.549955  |
| H  | 5.611555  | -2.721465 | -0.35834  |
| H  | 4.237095  | -1.728525 | -0.54416  |
| Au | 1.34919   | 2.0026    | 1.228445  |
| Au | 2.318285  | 0.665855  | -1.230725 |

|    |           |           |           |
|----|-----------|-----------|-----------|
| N  | 4.51155   | 0.969095  | -3.141365 |
| N  | 4.825335  | 2.063115  | -1.35603  |
| C  | 4.01964   | 1.25077   | -1.982745 |
| C  | 5.68765   | 1.613955  | -3.345045 |
| O  | 6.360535  | 1.57035   | -4.267115 |
| C  | 5.900735  | 2.37329   | -2.106435 |
| O  | 6.765425  | 3.06242   | -1.815925 |
| C  | 3.953235  | 0.04465   | -4.06847  |
| H  | 3.07895   | -0.27721  | -3.592235 |
| C  | 3.602495  | 0.698725  | -5.314775 |
| H  | 3.156755  | -0.00152  | -5.946905 |
| H  | 4.444195  | 1.081955  | -5.796995 |
| H  | 2.907665  | 1.460245  | -5.15755  |
| C  | 4.86077   | -1.076065 | -4.252295 |
| H  | 5.0996    | -1.530165 | -3.342005 |
| H  | 5.74465   | -0.779095 | -4.71922  |
| H  | 4.40534   | -1.786475 | -4.8659   |
| C  | 4.66792   | 2.514935  | -0.052345 |
| N  | 3.42969   | 3.982495  | 1.320785  |
| N  | 2.31819   | 4.008145  | 3.12284   |
| C  | 2.42459   | 3.45382   | 1.96327   |
| C  | 4.05859   | 4.914445  | 2.0634    |
| O  | 4.97135   | 5.532705  | 1.7613    |
| C  | 3.28928   | 4.936295  | 3.313885  |
| O  | 3.46522   | 5.58847   | 4.235195  |
| C  | 3.80247   | 3.68961   | 0.01539   |
| C  | 1.284875  | 3.747275  | 4.065905  |
| H  | 0.704995  | 3.016155  | 3.5929    |
| C  | 1.824     | 3.203115  | 5.297105  |
| H  | 2.457175  | 3.882365  | 5.771725  |
| H  | 2.33187   | 2.309545  | 5.1224    |
| H  | 1.033695  | 2.98908   | 5.94358   |
| C  | 0.49533   | 4.94912   | 4.27557   |
| H  | -0.30913  | 4.7234    | 4.900005  |
| H  | 0.119985  | 5.323895  | 3.37554   |
| H  | 1.053455  | 5.696865  | 4.74088   |
| H  | 5.62077   | 2.741035  | 0.30704   |
| H  | 4.25657   | 1.737645  | 0.508345  |
| H  | 4.29685   | 4.530265  | -0.354445 |
| H  | 2.932935  | 3.52279   | -0.5358   |
| Au | 0.085595  | -2.404735 | 1.229775  |
| Au | -1.48485  | -1.89525  | -1.22968  |
| N  | -3.094435 | -3.42969  | -3.127685 |
| N  | -2.71681  | -4.48932  | -1.33418  |
| C  | -2.5346   | -3.36376  | -1.96764  |
| C  | -3.66529  | -4.643885 | -3.328705 |
| O  | -4.228355 | -5.010015 | -4.25296  |
| C  | -3.398435 | -5.37719  | -2.08468  |
| O  | -3.69018  | -6.4429   | -1.792365 |
| C  | -3.174615 | -2.359515 | -4.06182  |
| H  | -2.66399  | -1.58194  | -3.583305 |
| C  | -2.48919  | -2.68964  | -5.296345 |
| H  | -2.5365   | -1.867795 | -5.93712  |
| H  | -2.934265 | -3.501415 | -5.776095 |
| H  | -1.48067  | -2.89028  | -5.12411  |
| C  | -4.56494  | -1.98854  | -4.26645  |
| H  | -5.03728  | -1.757595 | -3.363665 |
| H  | -5.09884  | -2.750915 | -4.73632  |
| H  | -4.605695 | -1.149405 | -4.884805 |
| C  | -2.330635 | -4.755035 | -0.02698  |
| N  | -0.474905 | -5.22044  | 1.355555  |
| N  | 0.46569   | -4.582705 | 3.141935  |
| C  | 0.053295  | -4.204035 | 1.97999   |
| C  | -0.45239  | -6.334885 | 2.1128    |
| O  | -0.85082  | -7.36782  | 1.827325  |
| C  | 0.20197   | -5.89684  | 3.351885  |
| O  | 0.439565  | -6.52023  | 4.27918   |
| C  | -0.946105 | -5.212935 | 0.04921   |

|    |           |           |           |
|----|-----------|-----------|-----------|
| C  | 1.173535  | -3.766655 | 4.068375  |
| H  | 1.221985  | -2.83936  | 3.58682   |
| C  | 0.43567   | -3.62007  | 5.308125  |
| H  | 0.318535  | -4.534635 | 5.794905  |
| H  | -0.49742  | -3.18649  | 5.141115  |
| H  | 0.965105  | -2.98053  | 5.93997   |
| C  | 2.51275   | -4.295235 | 4.26512   |
| H  | 3.049595  | -3.64363  | 4.877775  |
| H  | 3.023565  | -4.393655 | 3.359295  |
| H  | 2.49109   | -5.224145 | 4.738125  |
| H  | -2.978535 | -5.48682  | 0.33763   |
| H  | -2.44568  | -3.877425 | 0.524685  |
| H  | -0.863075 | -6.189535 | -0.308465 |
| H  | -0.331645 | -4.5809   | -0.50844  |
| Au | 0.00266   | 0.002565  | -2.654585 |
| Au | -2.26062  | -0.828115 | 1.229585  |
| Au | -2.26081  | 0.82878   | -1.228635 |
| Au | 0.003135  | 0.002945  | -0.000285 |
| Au | 0.00399   | 0.00437   | 2.654015  |
| Cl | 0.01045   | 0.006365  | -4.87122  |
| Cl | 0.00988   | 0.008835  | 4.870745  |
| N  | -4.218095 | 1.880715  | -3.129965 |
| N  | -5.111    | 1.17686   | -1.34406  |
| C  | -3.98297  | 1.361635  | -1.97296  |
| C  | -5.54952  | 2.04497   | -3.3326   |
| O  | -6.07107  | 2.47228   | -4.254955 |
| C  | -6.165785 | 1.55268   | -2.09399  |
| O  | -7.270255 | 1.49397   | -1.805    |
| C  | -3.225155 | 2.302895  | -4.057545 |
| H  | -2.327405 | 2.05865   | -3.57922  |
| C  | -3.319205 | 1.56028   | -5.299385 |
| H  | -2.551225 | 1.869125  | -5.93427  |
| H  | -4.227785 | 1.732895  | -5.781035 |
| H  | -3.1939   | 0.53827   | -5.136745 |
| C  | -3.31151  | 3.74091   | -4.248495 |
| H  | -3.24178  | 4.253435  | -3.341055 |
| H  | -4.20318  | 4.011375  | -4.71637  |
| H  | -2.528045 | 4.05061   | -4.86343  |
| C  | -5.24666  | 0.708415  | -0.043795 |
| N  | -5.10739  | -1.21771  | 1.31366   |
| N  | -4.223985 | -1.90608  | 3.1103    |
| C  | -3.9843   | -1.38244  | 1.95586   |
| C  | -6.16436  | -1.61006  | 2.052     |
| O  | -7.26598  | -1.56997  | 1.74971   |
| C  | -5.555125 | -2.091425 | 3.29821   |
| O  | -6.08076  | -2.52681  | 4.214485  |
| C  | -5.236305 | -0.75107  | 0.01216   |
| C  | -3.234275 | -2.308595 | 4.050325  |
| H  | -2.33548  | -2.05675  | 3.577985  |
| C  | -3.348465 | -1.55743  | 5.28542   |
| H  | -4.260655 | -1.734225 | 5.75871   |
| H  | -3.23095  | -0.535515 | 5.11575   |
| H  | -2.584855 | -1.854115 | 5.931515  |
| C  | -3.302865 | -3.746135 | 4.252675  |
| H  | -2.519115 | -4.04035  | 4.87521   |
| H  | -3.220785 | -4.26512  | 3.349605  |
| H  | -4.19387  | -4.02458  | 4.71694   |
| H  | -6.14992  | 1.082145  | 0.320435  |
| H  | -4.45588  | 1.09117   | 0.518415  |
| H  | -6.12997  | -1.13829  | -0.36138  |
| H  | -4.433745 | -1.12176  | -0.541405 |

200

7 NHC-Me S0 Ground State

|    |        |        |         |
|----|--------|--------|---------|
| Au | 2.0591 | 1.2407 | -1.3139 |
| Au | 1.8163 | 1.5749 | 1.3139  |
| N  | 2.4368 | 4.1342 | 2.4261  |
| N  | 3.6733 | 3.8552 | 0.8005  |
| C  | 2.8533 | 3.2177 | 1.6039  |

|    |         |         |         |
|----|---------|---------|---------|
| C  | 2.9851  | 5.3004  | 2.1682  |
| H  | 2.7917  | 6.1492  | 2.7141  |
| C  | 3.7545  | 5.1348  | 1.1511  |
| H  | 4.3668  | 5.8042  | 0.6678  |
| C  | 1.5464  | 3.8966  | 3.5036  |
| H  | 0.9738  | 3.0833  | 3.1898  |
| C  | 2.2836  | 3.5315  | 4.6959  |
| H  | 1.6160  | 3.2780  | 5.4551  |
| H  | 2.8770  | 4.3198  | 5.0321  |
| H  | 2.8889  | 2.7063  | 4.5140  |
| C  | 0.6806  | 5.0360  | 3.7201  |
| H  | 0.1525  | 5.2836  | 2.8583  |
| H  | 1.2036  | 5.8717  | 4.0573  |
| H  | -0.0041 | 4.7964  | 4.4659  |
| C  | 4.7482  | 3.4497  | 0.0000  |
| N  | 4.8016  | 2.3022  | -0.8005 |
| N  | 4.6848  | 1.0400  | -2.4261 |
| C  | 3.9418  | 1.7193  | -1.6039 |
| C  | 6.0436  | 1.9840  | -1.1511 |
| H  | 6.8695  | 2.3594  | -0.6678 |
| C  | 5.9634  | 1.2011  | -2.1682 |
| H  | 6.7109  | 0.7548  | -2.7141 |
| C  | 4.1838  | 0.2666  | -3.5036 |
| H  | 3.2333  | -0.0267 | -3.1898 |
| C  | 4.0644  | 1.0805  | -4.6959 |
| H  | 4.9975  | 1.4013  | -5.0321 |
| H  | 3.4666  | 1.9111  | -4.5140 |
| H  | 3.6168  | 0.5239  | -5.4551 |
| C  | 4.9998  | -0.9089 | -3.7201 |
| H  | 4.5604  | -1.4861 | -4.4659 |
| H  | 5.0721  | -1.4877 | -2.8583 |
| H  | 5.9561  | -0.6698 | -4.0573 |
| H  | 5.5719  | 3.3539  | 0.6308  |
| H  | 4.9115  | 4.2628  | -0.6308 |
| Au | -2.3951 | 0.2065  | -1.3139 |
| Au | -2.3951 | -0.2065 | 1.3139  |
| N  | -4.4014 | -1.9124 | 2.4261  |
| N  | -5.2377 | -0.9598 | 0.8005  |
| C  | -4.1997 | -0.9260 | 1.6039  |
| C  | -5.5305 | -2.5336 | 2.1682  |
| H  | -5.8729 | -3.3339 | 2.7141  |
| C  | -6.0556 | -1.9473 | 1.1511  |
| H  | -6.9444 | -2.1290 | 0.6678  |
| C  | -3.5415 | -2.2435 | 3.5036  |
| H  | -2.6002 | -1.9221 | 3.1898  |
| C  | -3.9233 | -1.5148 | 4.6959  |
| H  | -3.2341 | -1.7021 | 5.4551  |
| H  | -4.8667 | -1.8038 | 5.0321  |
| H  | -3.9278 | -0.4914 | 4.5140  |
| C  | -3.5106 | -3.6741 | 3.7201  |
| H  | -3.2290 | -4.1849 | 2.8583  |
| H  | -4.4249 | -4.0428 | 4.0573  |
| H  | -2.8159 | -3.8827 | 4.4659  |
| C  | -5.8691 | 0.0000  | 0.0000  |
| N  | -5.2377 | 0.9598  | -0.8005 |
| N  | -4.4014 | 1.9124  | -2.4261 |
| C  | -4.1997 | 0.9260  | -1.6039 |
| C  | -6.0556 | 1.9473  | -1.1511 |
| H  | -6.9444 | 2.1290  | -0.6678 |
| C  | -5.5305 | 2.5336  | -2.1682 |
| H  | -5.8729 | 3.3339  | -2.7141 |
| C  | -3.5415 | 2.2435  | -3.5036 |
| H  | -2.6002 | 1.9221  | -3.1898 |
| C  | -3.9233 | 1.5148  | -4.6959 |
| H  | -4.8667 | 1.8038  | -5.0321 |
| H  | -3.9278 | 0.4914  | -4.5140 |
| H  | -3.2341 | 1.7021  | -5.4551 |
| C  | -3.5106 | 3.6741  | -3.7201 |

|    |         |         |         |
|----|---------|---------|---------|
| H  | -2.8159 | 3.8827  | -4.4659 |
| H  | -3.2290 | 4.1849  | -2.8583 |
| H  | -4.4249 | 4.0428  | -4.0573 |
| H  | -6.4791 | 0.5617  | 0.6308  |
| H  | -6.4791 | -0.5617 | -0.6308 |
| Au | -0.5437 | 2.3418  | -1.3139 |
| Au | -0.9366 | 2.2141  | 1.3139  |
| N  | -3.1789 | 3.5950  | 2.4261  |
| N  | -2.5314 | 4.6848  | 0.8005  |
| C  | -2.1784 | 3.7079  | 1.6039  |
| C  | -4.1185 | 4.4769  | 2.1682  |
| H  | -4.9856 | 4.5553  | 2.7141  |
| C  | -3.7232 | 5.1575  | 1.1511  |
| H  | -4.1708 | 5.9466  | 0.6678  |
| C  | -3.2281 | 2.6748  | 3.5036  |
| H  | -2.6315 | 1.8789  | 3.1898  |
| C  | -2.6530 | 3.2632  | 4.6959  |
| H  | -2.6182 | 2.5498  | 5.4551  |
| H  | -3.2194 | 4.0710  | 5.0321  |
| H  | -1.6811 | 3.5837  | 4.5140  |
| C  | -4.5791 | 2.2035  | 3.7201  |
| H  | -4.9779 | 1.7777  | 2.8583  |
| H  | -5.2124 | 2.9591  | 4.0573  |
| H  | -4.5629 | 1.4782  | 4.4659  |
| C  | -1.8136 | 5.5818  | 0.0000  |
| N  | -0.7058 | 5.2780  | -0.8005 |
| N  | 0.4587  | 4.7769  | -2.4261 |
| C  | -0.4171 | 4.2802  | -1.6039 |
| C  | -0.0193 | 6.3609  | -1.1511 |
| H  | -0.1211 | 7.2625  | -0.6678 |
| C  | 0.7005  | 6.0427  | -2.1682 |
| H  | 1.3559  | 6.6157  | -2.7141 |
| C  | 1.0393  | 4.0614  | -3.5036 |
| H  | 1.0246  | 3.0668  | -3.1898 |
| C  | 0.2283  | 4.1994  | -4.6959 |
| H  | 0.2117  | 5.1859  | -5.0321 |
| H  | -0.7464 | 3.8874  | -4.5140 |
| H  | 0.6194  | 3.6017  | -5.4551 |
| C  | 2.4094  | 4.4742  | -3.7201 |
| H  | 2.8225  | 3.8779  | -4.4659 |
| H  | 2.9822  | 4.3642  | -2.8583 |
| H  | 2.4776  | 5.4577  | -4.0573 |
| H  | -1.4679 | 6.3356  | 0.6308  |
| H  | -2.5364 | 5.9884  | -0.6308 |
| Au | -0.9366 | -2.2141 | -1.3139 |
| Au | -0.5437 | -2.3418 | 1.3139  |
| N  | 0.4587  | -4.7769 | 2.4261  |
| N  | -0.7058 | -5.2780 | 0.8005  |
| C  | -0.4171 | -4.2802 | 1.6039  |
| C  | 0.7005  | -6.0427 | 2.1682  |
| H  | 1.3559  | -6.6157 | 2.7141  |
| C  | -0.0193 | -6.3609 | 1.1511  |
| H  | -0.1211 | -7.2625 | 0.6678  |
| C  | 1.0393  | -4.0614 | 3.5036  |
| H  | 1.0246  | -3.0668 | 3.1898  |
| C  | 0.2283  | -4.1994 | 4.6959  |
| H  | 0.6194  | -3.6017 | 5.4551  |
| H  | 0.2117  | -5.1859 | 5.0321  |
| H  | -0.7464 | -3.8874 | 4.5140  |
| C  | 2.4094  | -4.4742 | 3.7201  |
| H  | 2.9822  | -4.3642 | 2.8583  |
| H  | 2.4776  | -5.4577 | 4.0573  |
| H  | 2.8225  | -3.8779 | 4.4659  |
| C  | -1.8136 | -5.5818 | 0.0000  |
| N  | -2.5314 | -4.6848 | -0.8005 |
| N  | -3.1789 | -3.5950 | -2.4261 |
| C  | -2.1784 | -3.7079 | -1.6039 |
| C  | -3.7232 | -5.1575 | -1.1511 |

|    |         |         |         |
|----|---------|---------|---------|
| H  | -4.1708 | -5.9466 | -0.6678 |
| C  | -4.1185 | -4.4769 | -2.1682 |
| H  | -4.9856 | -4.5553 | -2.7141 |
| C  | -3.2281 | -2.6748 | -3.5036 |
| H  | -2.6315 | -1.8789 | -3.1898 |
| C  | -2.6530 | -3.2632 | -4.6959 |
| H  | -3.2194 | -4.0710 | -5.0321 |
| H  | -1.6811 | -3.5837 | -4.5140 |
| H  | -2.6182 | -2.5498 | -5.4551 |
| C  | -4.5791 | -2.2035 | -3.7201 |
| H  | -4.5629 | -1.4782 | -4.4659 |
| H  | -4.9779 | -1.7777 | -2.8583 |
| H  | -5.2124 | -2.9591 | -4.0573 |
| H  | -2.5364 | -5.9884 | 0.6308  |
| H  | -1.4679 | -6.3356 | -0.6308 |
| Au | 0.0000  | 0.0000  | 2.6754  |
| Au | 1.8163  | -1.5749 | -1.3139 |
| Au | 2.0591  | -1.2407 | 1.3139  |
| Au | 0.0000  | 0.0000  | 0.0000  |
| Au | 0.0000  | 0.0000  | -2.6754 |
| Cl | 0.0000  | 0.0000  | 4.9216  |
| Cl | 0.0000  | 0.0000  | -4.9216 |
| N  | 4.6848  | -1.0400 | 2.4261  |
| N  | 4.8016  | -2.3022 | 0.8005  |
| C  | 3.9418  | -1.7193 | 1.6039  |
| C  | 5.9634  | -1.2011 | 2.1682  |
| H  | 6.7109  | -0.7548 | 2.7141  |
| C  | 6.0436  | -1.9840 | 1.1511  |
| H  | 6.8695  | -2.3594 | 0.6678  |
| C  | 4.1838  | -0.2666 | 3.5036  |
| H  | 3.2333  | 0.0267  | 3.1898  |
| C  | 4.0644  | -1.0805 | 4.6959  |
| H  | 3.6168  | -0.5239 | 5.4551  |
| H  | 4.9975  | -1.4013 | 5.0321  |
| H  | 3.4666  | -1.9111 | 4.5140  |
| C  | 4.9998  | 0.9089  | 3.7201  |
| H  | 5.0721  | 1.4877  | 2.8583  |
| H  | 5.9561  | 0.6698  | 4.0573  |
| H  | 4.5604  | 1.4861  | 4.4659  |
| C  | 4.7482  | -3.4497 | 0.0000  |
| N  | 3.6733  | -3.8552 | -0.8005 |
| N  | 2.4368  | -4.1342 | -2.4261 |
| C  | 2.8533  | -3.2177 | -1.6039 |
| C  | 3.7545  | -5.1348 | -1.1511 |
| H  | 4.3668  | -5.8042 | -0.6678 |
| C  | 2.9851  | -5.3004 | -2.1682 |
| H  | 2.7917  | -6.1492 | -2.7141 |
| C  | 1.5464  | -3.8966 | -3.5036 |
| H  | 0.9738  | -3.0833 | -3.1898 |
| C  | 2.2836  | -3.5315 | -4.6959 |
| H  | 2.8770  | -4.3198 | -5.0321 |
| H  | 2.8889  | -2.7063 | -4.5140 |
| H  | 1.6160  | -3.2780 | -5.4551 |
| C  | 0.6806  | -5.0360 | -3.7201 |
| H  | -0.0041 | -4.7964 | -4.4659 |
| H  | 0.1525  | -5.2836 | -2.8583 |
| H  | 1.2036  | -5.8717 | -4.0573 |
| H  | 4.9115  | -4.2628 | 0.6308  |
| H  | 5.5719  | -3.3539 | -0.6308 |

275

1 dppe T1 Excited State

|    |         |         |         |
|----|---------|---------|---------|
| Au | 0.0098  | 0.0139  | -2.5918 |
| Au | -1.4468 | 2.0132  | 1.2132  |
| Au | 1.4607  | 1.9903  | 1.1789  |
| Au | 0.0044  | 2.4886  | -1.2196 |
| Au | -0.0119 | -2.4505 | 1.2204  |
| Au | 0.0044  | 0.0196  | 0.0001  |
| Au | -1.4197 | -1.9710 | -1.1775 |



|    |         |         |         |
|----|---------|---------|---------|
| Au | 2.3225  | 0.7938  | -1.1883 |
| Au | 2.3261  | -0.7538 | 1.1798  |
| Au | -2.3329 | 0.7570  | -1.1813 |
| Au | -2.3265 | -0.7163 | 1.1887  |
| Au | 1.4712  | -1.9651 | -1.2140 |
| Au | 0.0026  | 0.0165  | 2.5921  |
| P  | -2.0120 | -4.0491 | -1.8675 |
| P  | 3.2167  | 3.2588  | 1.8524  |
| P  | -0.8058 | 4.5401  | -1.8595 |
| P  | 3.2284  | -3.3030 | -1.8250 |
| P  | 4.0173  | -2.0969 | 1.8782  |
| P  | -0.6673 | -4.5618 | 1.8358  |
| Cl | 0.0022  | 0.0208  | -4.8528 |
| Cl | 0.0066  | 0.0130  | 4.8534  |
| P  | -4.5029 | 0.7552  | -1.8541 |
| P  | -4.4953 | -0.7061 | 1.8585  |
| P  | 4.0572  | 2.0939  | -1.8605 |
| P  | -2.0178 | 4.1407  | 1.8471  |
| C  | 3.1334  | 4.9929  | 1.9168  |
| C  | -3.7015 | 4.5388  | 1.9876  |
| C  | -4.9231 | 3.2937  | -2.4914 |
| C  | -6.7234 | 2.2398  | -1.4976 |
| C  | -4.8546 | -3.2505 | 2.4981  |
| C  | -1.5095 | -3.4135 | 4.1022  |
| C  | -6.8254 | -4.4174 | 2.2662  |
| C  | -2.1518 | -5.6048 | 3.7932  |
| C  | -3.7018 | 0.4103  | 4.1516  |
| C  | -6.9146 | 4.4137  | -2.2146 |
| C  | -1.6336 | 3.3766  | -4.1197 |
| C  | 4.1537  | 5.7582  | 1.5300  |
| C  | -6.6918 | -2.2427 | 1.5296  |
| C  | 5.6659  | 1.4418  | -1.9561 |
| C  | 2.0550  | 5.5647  | 2.4482  |
| C  | -5.4544 | 2.2077  | -1.9209 |
| C  | -5.5571 | -4.3626 | 2.6647  |
| C  | 5.8019  | -0.2573 | 2.5517  |
| C  | -1.8843 | -5.0221 | 0.6480  |
| C  | -0.6539 | 3.7156  | 4.1055  |
| C  | -4.1781 | 5.7299  | 1.6130  |
| C  | 5.0316  | -3.3044 | -3.7928 |
| C  | 3.0225  | 7.6371  | 2.1970  |
| C  | -2.2773 | 5.5719  | -3.8323 |
| C  | -6.1703 | 0.8686  | 5.0226  |
| C  | 4.1350  | -3.4090 | 0.7078  |
| C  | -5.4184 | -2.1794 | 1.9330  |
| C  | -4.7441 | 0.0843  | 3.3879  |
| C  | 4.0965  | 7.0746  | 1.6698  |
| C  | 2.0034  | 6.8818  | 2.5850  |
| C  | -5.9830 | 0.3081  | 3.8354  |
| C  | -1.3173 | -4.5110 | -3.3928 |
| C  | 3.7807  | 2.9025  | -3.3743 |
| C  | -0.6748 | -3.6158 | -4.1414 |
| C  | 3.8688  | 2.7533  | 3.3852  |
| C  | -1.9877 | 5.0753  | -0.6723 |
| C  | -5.6529 | 4.3893  | -2.6361 |
| C  | -1.3952 | 5.2728  | 0.6543  |
| C  | 4.1766  | 3.3929  | -0.6724 |
| C  | 5.8330  | 0.2392  | -2.5129 |
| C  | -5.3321 | -0.2654 | -0.6759 |
| C  | 3.8893  | -2.7771 | -3.3471 |
| C  | 3.2170  | 1.8636  | 4.1321  |
| C  | -1.3339 | -5.1808 | -0.6999 |
| C  | -0.9402 | 6.2039  | 4.9719  |
| C  | -2.7806 | -5.5762 | 4.9544  |
| C  | -1.5211 | -4.5162 | 3.3518  |
| C  | 5.6264  | -1.4529 | 1.9836  |
| C  | -1.2935 | 4.6119  | 3.3532  |
| C  | -7.3893 | -3.3585 | 1.6956  |

|   |         |         |         |
|---|---------|---------|---------|
| C | -0.1579 | 4.0655  | 5.2822  |
| C | -3.8953 | 0.9659  | 5.3425  |
| C | -2.8776 | 5.5461  | -5.0132 |
| C | 4.5958  | -3.8086 | 3.8364  |
| C | 3.2340  | -1.8959 | -4.1013 |
| C | -5.3443 | 0.2954  | 0.6791  |
| C | 4.4934  | 2.9246  | 0.6805  |
| C | 3.7276  | -2.8946 | 3.3957  |
| C | 5.0001  | 3.2960  | 3.8435  |
| C | 4.6330  | 3.8344  | -3.8011 |
| C | 1.5801  | -5.7886 | 2.5143  |
| C | -1.6571 | 4.4814  | -3.3740 |
| C | 5.5153  | -2.9392 | -4.9711 |
| C | 7.0257  | 0.2181  | 2.7350  |
| C | -4.5213 | 3.6548  | 2.5665  |
| C | 5.4788  | 2.9325  | 5.0236  |
| C | 4.8596  | -2.0579 | -5.7174 |
| C | -5.1275 | 1.1950  | 5.7779  |
| C | 4.8294  | 2.0378  | 5.7575  |
| C | -2.7715 | -4.4727 | 5.6922  |
| C | 7.0537  | -0.2503 | -2.6802 |
| C | -2.8518 | 4.4411  | -5.7515 |
| C | 1.9873  | -8.0398 | 2.2810  |
| C | 7.9131  | -1.6791 | 1.7852  |
| C | 4.4009  | -4.3969 | 5.0044  |
| C | 2.4901  | -3.1568 | 5.3168  |
| C | -2.2312 | 3.3589  | -5.3051 |
| C | 3.3496  | -4.0706 | 5.7452  |
| C | 4.4372  | 4.4217  | -4.9706 |
| C | 8.1139  | 0.4513  | -2.2934 |
| C | 2.5612  | 3.1419  | -5.3160 |
| C | 8.0824  | -0.4919 | 2.3545  |
| C | 0.3902  | -5.9368 | 1.9340  |
| C | 6.6920  | -2.1591 | 1.5988  |
| C | 7.9534  | 1.6456  | -1.7348 |
| C | 4.1361  | -7.1170 | -1.7151 |
| C | -4.7377 | -0.0439 | -3.3829 |
| C | -6.2465 | -5.1328 | -2.2916 |
| C | -3.6892 | -0.3813 | -4.1320 |
| C | -6.1503 | -0.8507 | -5.0179 |
| C | -4.1331 | -5.6753 | -1.5833 |
| C | 2.0446  | -6.9183 | -2.6534 |
| C | -5.4048 | -6.0027 | -1.7507 |
| C | -4.5438 | -3.6005 | -2.5016 |
| C | 2.0876  | -5.6052 | -2.4780 |
| C | 3.1612  | -5.0370 | -1.9196 |
| C | 3.0681  | -7.6758 | -2.2765 |
| C | 4.1834  | -5.8047 | -1.5329 |
| C | -3.8722 | -0.9579 | -5.3136 |
| C | -5.9733 | -0.2731 | -3.8380 |
| C | 0.8072  | -8.1931 | 1.7020  |
| C | -3.6924 | -4.4729 | -1.9585 |
| C | -5.8149 | -3.9335 | -2.6658 |
| C | 6.7356  | 2.1412  | -1.5672 |
| C | 3.7201  | -1.5373 | -5.2827 |
| C | 3.6999  | 1.5039  | 5.3124  |
| C | -5.1013 | -1.1910 | -5.7568 |
| C | 1.4926  | 5.6464  | -2.5600 |
| C | 0.8064  | 8.1137  | -1.8555 |
| C | -0.0331 | 7.1098  | -1.6413 |
| C | 0.0123  | -7.1476 | 1.5252  |
| C | 2.6786  | -2.5657 | 4.1468  |
| C | 0.3026  | 5.8683  | -1.9981 |
| C | 4.4877  | -2.9632 | -0.6418 |
| C | -5.4518 | 6.0330  | 1.8226  |
| C | 2.3711  | -6.8380 | 2.6854  |
| C | -5.7940 | 3.9641  | 2.7730  |
| C | -6.2610 | 5.1514  | 2.4048  |

|   |         |         |         |
|---|---------|---------|---------|
| C | -7.4485 | 3.3390  | -1.6451 |
| C | -2.1350 | -3.3936 | 5.2682  |
| C | 2.7489  | 2.5545  | -4.1428 |
| C | -0.3021 | 5.3067  | 5.7163  |
| C | -0.1796 | -3.9673 | -5.3198 |
| C | -0.3274 | -5.2096 | -5.7556 |
| C | 2.3280  | 6.6550  | -2.7703 |
| C | 3.4030  | 4.0752  | -5.7286 |
| C | -1.4738 | -5.7580 | -3.8418 |
| C | 1.9861  | 7.8877  | -2.4223 |
| C | -0.9716 | -6.1049 | -5.0151 |
| C | -1.4400 | 5.8602  | 3.7966  |
| H | -1.0617 | 7.1702  | 5.3158  |
| H | 0.0749  | 5.5773  | 6.6408  |
| H | 0.3315  | 3.3606  | 5.8604  |
| H | -0.5559 | 2.7395  | 3.7803  |
| H | -1.9674 | 6.5583  | 3.2422  |
| H | 1.2628  | 4.9802  | 2.7703  |
| H | 1.1662  | 7.3154  | 3.0024  |
| H | 2.9836  | 8.6639  | 2.3080  |
| H | 4.8945  | 7.6604  | 1.3713  |
| H | 5.0039  | 5.3396  | 1.1234  |
| H | 2.6352  | 8.6756  | -2.5943 |
| H | 3.2438  | 6.4719  | -3.2143 |
| H | 0.5353  | 9.0750  | -1.5869 |
| H | -0.9511 | 7.3100  | -1.2080 |
| H | 1.7612  | 4.6883  | -2.8474 |
| H | 7.1513  | 1.1419  | 3.1847  |
| H | 9.0377  | -0.1240 | 2.5050  |
| H | 5.4986  | 4.0188  | 3.2954  |
| H | 6.3532  | 3.3586  | 5.3768  |
| H | 2.3251  | 1.4559  | 3.7980  |
| H | 3.1837  | 0.8135  | 5.8828  |
| H | 5.2020  | 1.7642  | 6.6823  |
| H | 8.7343  | -2.2360 | 1.4910  |
| H | 6.5830  | -3.0902 | 1.1604  |
| H | 4.9835  | 0.2951  | 2.8671  |
| H | 6.6337  | 3.0777  | -1.1382 |
| H | 8.7786  | 2.1954  | -1.4352 |
| H | 9.0662  | 0.0716  | -2.4295 |
| H | 7.1743  | -1.1792 | -3.1207 |
| H | 5.0098  | -0.3074 | -2.8283 |
| H | 2.0129  | -1.8400 | 3.8260  |
| H | 1.6733  | -2.8922 | 5.8931  |
| H | 3.2074  | -4.5251 | 6.6629  |
| H | 5.0791  | -5.1004 | 5.3445  |
| H | 5.4384  | -4.0445 | 3.2842  |
| H | -1.0027 | -2.5718 | 3.7818  |
| H | -2.1155 | -2.5333 | 5.8434  |
| H | -3.2567 | -4.4575 | 6.6026  |
| H | -3.2687 | -6.4211 | 5.2902  |
| H | -2.1368 | -6.4824 | 3.2433  |
| H | -2.7377 | 0.2210  | 3.8235  |
| H | -3.0787 | 1.2103  | 5.9286  |
| H | -5.2790 | 1.6198  | 6.7117  |
| H | -7.1323 | 1.0362  | 5.3680  |
| H | -6.8044 | 0.0212  | 3.2739  |
| H | -4.1608 | 2.7316  | 2.8708  |
| H | -3.5631 | 6.4347  | 1.1673  |
| H | -5.8119 | 6.9616  | 1.5384  |
| H | -7.2530 | 5.3950  | 2.5740  |
| H | -6.4181 | 3.2755  | 3.2303  |
| H | -7.1615 | 1.4117  | -1.0589 |
| H | -8.4344 | 3.3546  | -1.3194 |
| H | -7.4853 | 5.2675  | -2.3333 |
| H | -5.2339 | 5.2226  | -3.0871 |
| H | -3.9434 | 3.2769  | -2.8386 |
| H | -1.1353 | 2.5333  | -3.7848 |

|   |         |         |         |
|---|---------|---------|---------|
| H | -2.2709 | 6.4505  | -3.2841 |
| H | -2.2002 | 2.4978  | -5.8793 |
| H | -3.3111 | 4.4281  | -6.6793 |
| H | -3.3536 | 6.3935  | -5.3651 |
| H | -2.7270 | -0.1842 | -3.8006 |
| H | -3.0499 | -1.2139 | -5.8862 |
| H | -5.2456 | -1.6309 | -6.6839 |
| H | -7.1095 | -1.0224 | -5.3692 |
| H | -6.7992 | 0.0196  | -3.2866 |
| H | -4.2102 | -2.6683 | -2.8121 |
| H | -3.4921 | -6.3707 | -1.1675 |
| H | -5.7372 | -6.9405 | -1.4638 |
| H | -7.2372 | -5.3951 | -2.4260 |
| H | -6.4655 | -3.2543 | -3.0935 |
| H | -8.3784 | -3.3978 | 1.3865  |
| H | -7.1543 | -1.4256 | 1.0927  |
| H | -5.1141 | -5.1837 | 3.1149  |
| H | -7.3750 | -5.2830 | 2.4045  |
| H | -3.8701 | -3.2092 | 2.8241  |
| H | -0.9075 | -7.2916 | 1.0822  |
| H | 0.5003  | -9.1305 | 1.3974  |
| H | 2.6029  | -8.8588 | 2.4230  |
| H | 3.2878  | -6.7159 | 3.1437  |
| H | 1.8804  | -4.8564 | 2.8482  |
| H | 5.0290  | -5.3900 | -1.1031 |
| H | 4.9383  | -7.7040 | -1.4271 |
| H | 3.0389  | -8.6999 | -2.4243 |
| H | 1.2117  | -7.3487 | -3.0950 |
| H | 1.2933  | -5.0184 | -2.7926 |
| H | -0.5674 | -2.6397 | -3.8114 |
| H | 0.3137  | -3.2630 | -5.8955 |
| H | 0.0520  | -5.4810 | -6.6777 |
| H | -1.0978 | -7.0713 | -5.3604 |
| H | -2.0076 | -6.4543 | -3.2913 |
| H | 2.3364  | -1.4966 | -3.7726 |
| H | 3.1991  | -0.8567 | -5.8630 |
| H | 5.2356  | -1.7848 | -6.6438 |
| H | 6.3987  | -3.3543 | -5.3145 |
| H | 5.5326  | -4.0195 | -3.2356 |
| H | 5.4626  | 4.0866  | -3.2356 |
| H | 2.0958  | 1.8169  | -3.8320 |
| H | 1.7582  | 2.8615  | -5.9054 |
| H | 3.2590  | 4.5301  | -6.6466 |
| H | 5.1000  | 5.1429  | -5.2984 |
| H | 3.2055  | -3.8854 | 0.7368  |
| H | 4.8174  | -4.1094 | 1.0691  |
| H | 4.6393  | -1.9308 | -0.6921 |
| H | 5.3802  | -3.3937 | -0.9644 |
| H | -1.4782 | -6.1489 | -1.0591 |
| H | -2.6096 | -4.2715 | 0.6937  |
| H | -6.2988 | -0.4485 | -1.0211 |
| H | -4.8743 | 1.2271  | 0.7255  |
| H | -2.7373 | 4.3484  | -0.6686 |
| H | -1.5505 | 6.2441  | 0.9991  |
| H | 3.2577  | 3.8869  | -0.7157 |
| H | 4.6388  | 1.8909  | 0.7186  |
| H | 4.8819  | 4.0834  | -1.0075 |
| H | 5.3816  | 3.3436  | 1.0302  |
| H | -0.3016 | -5.0238 | -0.7288 |
| H | -2.3603 | -5.8915 | 0.9710  |
| H | -4.8416 | -1.1869 | -0.7178 |
| H | -6.3187 | 0.4541  | 1.0154  |
| H | -2.4445 | 5.9459  | -1.0180 |
| H | -0.3595 | 5.1402  | 0.6502  |

215

2 NHC T1 Excited State

|    |         |        |         |
|----|---------|--------|---------|
| Au | -1.4597 | 1.8749 | 1.2489  |
| Au | 0.0769  | 2.3744 | -1.2454 |

|    |         |         |         |
|----|---------|---------|---------|
| N  | 0.4709  | 4.6824  | -3.0667 |
| N  | -0.3897 | 5.2388  | -1.2849 |
| C  | 0.1040  | 4.2148  | -1.9191 |
| C  | 0.1948  | 5.9684  | -3.1586 |
| H  | 0.4110  | 6.5307  | -3.9905 |
| C  | -0.3487 | 6.3189  | -2.0391 |
| H  | -0.6855 | 7.2366  | -1.7195 |
| C  | 1.1050  | 3.9222  | -4.0755 |
| H  | 1.2553  | 2.9929  | -3.6264 |
| C  | 0.2354  | 3.7563  | -5.2224 |
| H  | 0.7003  | 3.1432  | -5.9262 |
| H  | 0.0212  | 4.6697  | -5.6786 |
| H  | -0.6540 | 3.2913  | -4.9468 |
| C  | 2.3822  | 4.5165  | -4.4243 |
| H  | 2.9914  | 4.6328  | -3.5865 |
| H  | 2.2615  | 5.4475  | -4.8789 |
| H  | 2.8754  | 3.9040  | -5.1077 |
| C  | -0.8968 | 5.1804  | 0.0057  |
| N  | -2.7356 | 4.4828  | 1.3124  |
| N  | -3.1242 | 3.5154  | 3.0854  |
| C  | -2.5416 | 3.3587  | 1.9412  |
| C  | -3.4107 | 5.3273  | 2.0658  |
| H  | -3.6712 | 6.2705  | 1.7507  |
| C  | -3.6556 | 4.7171  | 3.1793  |
| H  | -4.1688 | 5.0409  | 4.0096  |
| C  | -2.2887 | 4.7364  | 0.0232  |
| C  | -3.2075 | 2.5183  | 4.0830  |
| H  | -2.7518 | 1.6899  | 3.6433  |
| C  | -2.4549 | 2.8955  | 5.2624  |
| H  | -2.8599 | 3.7384  | 5.7238  |
| H  | -1.4600 | 3.0805  | 5.0213  |
| H  | -2.4699 | 2.1118  | 5.9475  |
| C  | -4.5982 | 2.2215  | 4.3777  |
| H  | -4.6498 | 1.4389  | 5.0628  |
| H  | -5.1183 | 1.9418  | 3.5201  |
| H  | -5.0813 | 3.0405  | 4.8056  |
| H  | -0.7947 | 6.1216  | 0.4391  |
| H  | -0.3195 | 4.4980  | 0.5407  |
| H  | -2.9172 | 5.4466  | -0.4057 |
| H  | -2.3639 | 3.8487  | -0.5169 |
| Au | 2.2577  | -0.6635 | 1.3004  |
| Au | 1.3045  | -1.9950 | -1.2515 |
| N  | 2.4193  | -4.0012 | -3.1301 |
| N  | 3.4664  | -3.9362 | -1.3612 |
| C  | 2.4470  | -3.4129 | -1.9780 |
| C  | 3.4051  | -4.8681 | -3.2351 |
| H  | 3.5552  | -5.4487 | -4.0700 |
| C  | 4.0672  | -4.8268 | -2.1254 |
| H  | 4.8902  | -5.3616 | -1.8193 |
| C  | 1.4368  | -3.7764 | -4.1206 |
| H  | 0.7856  | -3.0957 | -3.6727 |
| C  | 2.0153  | -3.1652 | -5.2996 |
| H  | 1.2598  | -2.9590 | -5.9865 |
| H  | 2.7095  | -3.7941 | -5.7592 |
| H  | 2.4726  | -2.2608 | -5.0621 |
| C  | 0.7352  | -5.0119 | -4.4192 |
| H  | 0.3228  | -5.4335 | -3.5600 |
| H  | 1.3674  | -5.7134 | -4.8637 |
| H  | -0.0350 | -4.8199 | -5.0933 |
| C  | 3.8424  | -3.5977 | -0.0691 |
| N  | 4.8677  | -1.9357 | 1.2560  |
| N  | 4.6057  | -0.9913 | 3.0635  |
| C  | 4.0351  | -1.1871 | 1.9204  |
| C  | 5.9295  | -2.2149 | 1.9862  |
| H  | 6.7088  | -2.7921 | 1.6416  |
| C  | 5.7656  | -1.6173 | 3.1209  |
| H  | 6.3793  | -1.5845 | 3.9445  |
| C  | 4.6490  | -2.3806 | -0.0401 |

|    |         |         |         |
|----|---------|---------|---------|
| C  | 4.0794  | -0.1801 | 4.0950  |
| H  | 3.2300  | 0.2479  | 3.6670  |
| C  | 3.6793  | -0.9812 | 5.2348  |
| H  | 4.4950  | -1.4625 | 5.6726  |
| H  | 2.9706  | -1.6888 | 4.9547  |
| H  | 3.2373  | -0.3674 | 5.9529  |
| C  | 5.0334  | 0.8568  | 4.4464  |
| H  | 4.6077  | 1.4936  | 5.1519  |
| H  | 5.3063  | 1.4224  | 3.6155  |
| H  | 5.8963  | 0.4560  | 4.8728  |
| H  | 4.3579  | -4.4031 | 0.3424  |
| H  | 2.9719  | -3.4362 | 0.4810  |
| H  | 5.5744  | -2.5289 | -0.4928 |
| H  | 4.1406  | -1.6277 | -0.5503 |
| Au | 1.2454  | 1.9878  | 1.3362  |
| Au | 2.2538  | 0.5806  | -1.3702 |
| N  | 4.5592  | 1.0277  | -3.1144 |
| N  | 4.8074  | 1.9896  | -1.3124 |
| C  | 3.9925  | 1.2163  | -1.9671 |
| C  | 5.6995  | 1.6860  | -3.1838 |
| H  | 6.3071  | 1.6656  | -4.0121 |
| C  | 5.8562  | 2.2925  | -2.0529 |
| H  | 6.6209  | 2.8912  | -1.7168 |
| C  | 4.0490  | 0.1910  | -4.1338 |
| H  | 3.1944  | -0.2280 | -3.7065 |
| C  | 3.6605  | 0.9636  | -5.2955 |
| H  | 3.2312  | 0.3299  | -6.0033 |
| H  | 4.4799  | 1.4358  | -5.7360 |
| H  | 2.9454  | 1.6769  | -5.0433 |
| C  | 5.0060  | -0.8537 | -4.4505 |
| H  | 5.2747  | -1.3938 | -3.6014 |
| H  | 5.8706  | -0.4634 | -4.8844 |
| H  | 4.5855  | -1.5124 | -5.1391 |
| C  | 4.5915  | 2.4198  | -0.0120 |
| N  | 3.4023  | 3.9439  | 1.3319  |
| N  | 2.4140  | 3.9907  | 3.1361  |
| C  | 2.4177  | 3.4018  | 1.9851  |
| C  | 4.0126  | 4.8449  | 2.0763  |
| H  | 4.8145  | 5.3940  | 1.7411  |
| C  | 3.3872  | 4.8760  | 3.2068  |
| H  | 3.5525  | 5.4601  | 4.0358  |
| C  | 3.7433  | 3.6064  | 0.0311  |
| C  | 1.4648  | 3.7506  | 4.1563  |
| H  | 0.8124  | 3.0570  | 3.7310  |
| C  | 2.0906  | 3.1524  | 5.3179  |
| H  | 2.7921  | 3.7925  | 5.7509  |
| H  | 2.5517  | 2.2540  | 5.0657  |
| H  | 1.3611  | 2.9380  | 6.0304  |
| C  | 0.7486  | 4.9723  | 4.4730  |
| H  | -0.0022 | 4.7643  | 5.1637  |
| H  | 0.3089  | 5.3880  | 3.6245  |
| H  | 1.3768  | 5.6848  | 4.9048  |
| H  | 5.5167  | 2.6012  | 0.4293  |
| H  | 4.1183  | 1.6474  | 0.5030  |
| H  | 4.2148  | 4.4251  | -0.4058 |
| H  | 2.8605  | 3.4098  | -0.4866 |
| Au | 0.1419  | -2.3754 | 1.2595  |
| Au | -1.4252 | -1.8432 | -1.3215 |
| N  | -3.1347 | -3.4891 | -3.0646 |
| N  | -2.7762 | -4.4130 | -1.2640 |
| C  | -2.5523 | -3.3145 | -1.9234 |
| C  | -3.6906 | -4.6817 | -3.1278 |
| H  | -4.2050 | -5.0186 | -3.9525 |
| C  | -3.4652 | -5.2649 | -1.9966 |
| H  | -3.7488 | -6.1922 | -1.6564 |
| C  | -3.1939 | -2.5196 | -4.0927 |
| H  | -2.7884 | -1.6654 | -3.6529 |
| C  | -2.3679 | -2.9063 | -5.2184 |

|    |         |         |         |
|----|---------|---------|---------|
| H  | -2.3888 | -2.1525 | -5.9382 |
| H  | -2.7084 | -3.7886 | -5.6594 |
| H  | -1.3768 | -3.0260 | -4.9249 |
| C  | -4.5742 | -2.2760 | -4.4693 |
| H  | -5.1538 | -2.0075 | -3.6462 |
| H  | -5.0043 | -3.1126 | -4.9200 |
| H  | -4.6121 | -1.5015 | -5.1640 |
| C  | -2.3375 | -4.6434 | 0.0315  |
| N  | -0.4767 | -5.2174 | 1.3527  |
| N  | 0.3840  | -4.6614 | 3.1345  |
| C  | 0.0268  | -4.1957 | 1.9819  |
| C  | -0.4467 | -6.2948 | 2.1111  |
| H  | -0.7911 | -7.2104 | 1.7947  |
| C  | 0.0971  | -5.9430 | 3.2295  |
| H  | 0.3064  | -6.5037 | 4.0651  |
| C  | -0.9721 | -5.1583 | 0.0588  |
| C  | 1.0235  | -3.9066 | 4.1427  |
| H  | 1.1490  | -2.9663 | 3.7089  |
| C  | 0.1756  | -3.7762 | 5.3112  |
| H  | -0.0112 | -4.7010 | 5.7577  |
| H  | -0.7288 | -3.3244 | 5.0622  |
| H  | 0.6462  | -3.1649 | 6.0113  |
| C  | 2.3180  | -4.4879 | 4.4534  |
| H  | 2.8080  | -3.8875 | 5.1490  |
| H  | 2.9171  | -4.5641 | 3.6038  |
| H  | 2.2196  | -5.4369 | 4.8768  |
| H  | -2.9991 | -5.3060 | 0.4870  |
| H  | -2.3656 | -3.7349 | 0.5406  |
| H  | -0.9190 | -6.1122 | -0.3545 |
| H  | -0.3580 | -4.5170 | -0.4875 |
| Au | 0.0039  | 0.0013  | -2.8531 |
| Au | -2.1571 | -0.8346 | 1.3727  |
| Au | -2.1767 | 0.8839  | -1.3101 |
| Au | 0.0071  | 0.0012  | 0.0018  |
| Au | 0.0097  | -0.0024 | 2.8578  |
| Cl | -0.0449 | 0.0103  | -5.1550 |
| Cl | 0.0514  | 0.0033  | 5.1598  |
| N  | -4.2955 | 1.7925  | -3.1454 |
| N  | -5.0723 | 1.1800  | -1.3440 |
| C  | -3.9531 | 1.3229  | -1.9909 |
| C  | -5.6029 | 1.9285  | -3.2237 |
| H  | -6.0790 | 2.2943  | -4.0595 |
| C  | -6.0945 | 1.5396  | -2.0943 |
| H  | -7.0680 | 1.5069  | -1.7642 |
| C  | -3.3901 | 2.1612  | -4.1656 |
| H  | -2.4527 | 1.9729  | -3.7485 |
| C  | -3.5593 | 1.3258  | -5.3376 |
| H  | -2.8426 | 1.5821  | -6.0495 |
| H  | -4.5034 | 1.4473  | -5.7663 |
| H  | -3.4149 | 0.3226  | -5.0991 |
| C  | -3.5276 | 3.5771  | -4.4613 |
| H  | -3.3917 | 4.1594  | -3.6078 |
| H  | -4.4646 | 3.7950  | -4.8662 |
| H  | -2.8129 | 3.8540  | -5.1662 |
| C  | -5.1549 | 0.7102  | -0.0428 |
| N  | -5.0419 | -1.2231 | 1.2987  |
| N  | -4.2850 | -1.8520 | 3.1068  |
| C  | -3.9321 | -1.3657 | 1.9614  |
| C  | -6.0718 | -1.6002 | 2.0311  |
| H  | -7.0402 | -1.5720 | 1.6872  |
| C  | -5.5943 | -1.9976 | 3.1648  |
| H  | -6.0791 | -2.3763 | 3.9888  |
| C  | -5.1147 | -0.7469 | -0.0009 |
| C  | -3.3865 | -2.2265 | 4.1328  |
| H  | -2.4464 | -2.0901 | 3.7018  |
| C  | -3.5100 | -1.3479 | 5.2791  |
| H  | -4.4591 | -1.4076 | 5.7094  |
| H  | -3.3123 | -0.3620 | 5.0113  |

|   |         |         |         |
|---|---------|---------|---------|
| H | -2.8087 | -1.6215 | 6.0004  |
| C | -3.5755 | -3.6242 | 4.4757  |
| H | -2.8531 | -3.9123 | 5.1677  |
| H | -3.4901 | -4.2378 | 3.6378  |
| H | -4.5063 | -3.7902 | 4.9161  |
| H | -6.0307 | 1.0777  | 0.3829  |
| H | -4.3383 | 1.0873  | 0.4839  |
| H | -5.9564 | -1.1602 | -0.4538 |
| H | -4.2647 | -1.0756 | -0.5060 |

375

| 3  | NHC-iPr | T1      | Excited | State |
|----|---------|---------|---------|-------|
| Au | 2.3380  | 1.0570  | 1.3453  |       |
| Au | 2.2762  | -0.9507 | -1.2779 |       |
| N  | 4.1433  | -2.3430 | -3.0062 |       |
| N  | 5.1399  | -1.3690 | -1.1676 |       |
| C  | 4.1158  | -1.6648 | -1.9025 |       |
| C  | 2.8873  | -2.5663 | -3.6698 |       |
| H  | 2.1746  | -2.0812 | -3.0806 |       |
| C  | 2.8316  | -1.9659 | -4.9902 |       |
| H  | 1.8545  | -2.0332 | -5.3529 |       |
| H  | 3.4624  | -2.4306 | -5.6818 |       |
| H  | 3.0631  | -0.9511 | -4.9544 |       |
| C  | 2.5381  | -3.9752 | -3.6968 |       |
| H  | 2.6658  | -4.4083 | -2.7569 |       |
| H  | 3.0807  | -4.5258 | -4.4006 |       |
| H  | 1.5294  | -4.0611 | -3.9463 |       |
| C  | 4.9451  | -0.7053 | 0.0637  |       |
| N  | 5.2462  | 1.4067  | 1.2354  |       |
| N  | 4.2893  | 2.3798  | 3.0984  |       |
| C  | 4.2439  | 1.7221  | 1.9870  |       |
| C  | 5.0018  | 0.7641  | 0.0015  |       |
| C  | 3.0357  | 2.6203  | 3.7580  |       |
| C  | 2.9759  | 2.0486  | 5.0921  |       |
| H  | 3.6248  | 2.5049  | 5.7709  |       |
| H  | 3.1731  | 1.0248  | 5.0764  |       |
| H  | 2.0073  | 2.1559  | 5.4599  |       |
| C  | 2.6893  | 4.0330  | 3.7485  |       |
| H  | 1.6830  | 4.1320  | 3.9926  |       |
| H  | 2.8211  | 4.4403  | 2.7977  |       |
| H  | 3.2340  | 4.5983  | 4.4384  |       |
| H  | 5.6785  | -1.0508 | 0.7166  |       |
| H  | 4.0190  | -0.9949 | 0.4511  |       |
| H  | 5.7589  | 1.0548  | -0.6495 |       |
| H  | 4.1007  | 1.1247  | -0.3832 |       |
| H  | 2.3228  | 2.1221  | 3.1765  |       |
| C  | 5.3322  | 3.0599  | 3.8510  |       |
| H  | 4.7740  | 3.4756  | 4.6237  |       |
| C  | 5.9128  | 4.2292  | 3.1966  |       |
| C  | 6.2673  | 2.1918  | 4.5591  |       |
| H  | 5.7502  | 1.4526  | 5.0828  |       |
| H  | 6.9842  | 1.7254  | 3.9692  |       |
| H  | 6.7779  | 2.7714  | 5.2584  |       |
| H  | 6.6071  | 4.0287  | 2.4454  |       |
| H  | 6.4038  | 4.7947  | 3.9253  |       |
| H  | 5.1615  | 4.8237  | 2.7873  |       |
| C  | 5.1725  | -3.0370 | -3.7673 |       |
| H  | 4.6032  | -3.4304 | -4.5416 |       |
| C  | 5.7238  | -4.2312 | -3.1269 |       |
| C  | 6.1265  | -2.1921 | -4.4766 |       |
| H  | 5.6223  | -1.4463 | -5.0041 |       |
| H  | 6.8567  | -1.7360 | -3.8920 |       |
| H  | 6.6225  | -2.7932 | -5.1739 |       |
| H  | 6.4169  | -4.0587 | -2.3691 |       |
| H  | 6.2090  | -4.7984 | -3.8582 |       |
| H  | 4.9558  | -4.8138 | -2.7310 |       |
| C  | 6.6111  | 1.7265  | 1.4825  |       |
| H  | 6.5922  | 2.2940  | 2.3399  |       |
| C  | 7.1997  | 2.5641  | 0.4436  |       |



|    |         |         |         |
|----|---------|---------|---------|
| C  | 7.4347  | 0.5619  | 1.7772  |
| H  | 7.0143  | -0.0213 | 2.5348  |
| H  | 7.5900  | -0.0394 | 0.9397  |
| H  | 8.3763  | 0.8800  | 2.1006  |
| H  | 7.4307  | 2.0399  | -0.4281 |
| H  | 8.0965  | 2.9652  | 0.7953  |
| H  | 6.5687  | 3.3564  | 0.1944  |
| C  | 6.4855  | -1.7517 | -1.4261 |
| H  | 6.4341  | -2.3238 | -2.2771 |
| C  | 7.0438  | -2.6107 | -0.3894 |
| C  | 7.3639  | -0.6339 | -1.7364 |
| H  | 6.9616  | -0.0264 | -2.4825 |
| H  | 7.5719  | -0.0443 | -0.9044 |
| H  | 8.2780  | -1.0064 | -2.0809 |
| H  | 7.2982  | -2.0950 | 0.4809  |
| H  | 7.9233  | -3.0490 | -0.7460 |
| H  | 6.3819  | -3.3768 | -0.1377 |
| Au | 1.5685  | -1.8874 | 1.2495  |
| Au | -0.1998 | -2.4530 | -1.2379 |
| N  | -0.9601 | -4.6265 | -3.0427 |
| N  | 0.2381  | -5.3000 | -1.1929 |
| C  | -0.3342 | -4.3976 | -1.9316 |
| C  | -1.5410 | -3.4938 | -3.7063 |
| H  | -1.2788 | -2.6664 | -3.1206 |
| C  | -0.9944 | -3.2804 | -5.0352 |
| H  | -1.3658 | -2.3808 | -5.4104 |
| H  | -1.2434 | -4.0376 | -5.7127 |
| H  | 0.0453  | -3.1812 | -5.0073 |
| C  | -2.9968 | -3.5725 | -3.7209 |
| H  | -3.3672 | -3.8101 | -2.7767 |
| H  | -3.3688 | -4.2623 | -4.4159 |
| H  | -3.3798 | -2.6382 | -3.9755 |
| C  | 0.8076  | -4.9209 | 0.0404  |
| N  | 2.8871  | -4.4308 | 1.1973  |
| N  | 3.4860  | -3.1697 | 3.0312  |
| C  | 2.8398  | -3.3566 | 1.9239  |
| C  | 2.2027  | -4.4643 | -0.0353 |
| C  | 3.3199  | -1.8985 | 3.6811  |
| C  | 2.7234  | -2.0183 | 4.9985  |
| H  | 3.3422  | -2.5028 | 5.6890  |
| H  | 1.8078  | -2.5170 | 4.9560  |
| H  | 2.5190  | -1.0624 | 5.3661  |
| C  | 4.5664  | -1.1501 | 3.7158  |
| H  | 4.3524  | -0.1606 | 3.9557  |
| H  | 5.0295  | -1.1517 | 2.7821  |
| H  | 5.2427  | -1.5043 | 4.4293  |
| H  | 0.7484  | -5.7465 | 0.6708  |
| H  | 0.2223  | -4.1648 | 0.4605  |
| H  | 2.7380  | -5.0968 | -0.6644 |
| H  | 2.2275  | -3.5097 | -0.4575 |
| H  | 2.6522  | -1.3657 | 3.0794  |
| C  | 4.4478  | -3.9403 | 3.8066  |
| H  | 4.6464  | -3.2766 | 4.5803  |
| C  | 5.7602  | -4.1116 | 3.1824  |
| C  | 3.9168  | -5.0993 | 4.5175  |
| H  | 3.0529  | -4.8352 | 5.0397  |
| H  | 3.6971  | -5.9335 | 3.9346  |
| H  | 4.6342  | -5.3947 | 5.2212  |
| H  | 5.8120  | -4.8233 | 2.4248  |
| H  | 6.4375  | -4.4048 | 3.9232  |
| H  | 6.0919  | -3.2033 | 2.7907  |
| C  | -1.3187 | -5.8174 | -3.7993 |
| H  | -1.8707 | -5.3970 | -4.5728 |
| C  | -2.2923 | -6.6981 | -3.1531 |
| C  | -0.2252 | -6.4748 | -4.5145 |
| H  | 0.3254  | -5.7719 | -5.0551 |
| H  | 0.4421  | -7.0195 | -3.9301 |
| H  | -0.6489 | -7.1408 | -5.2029 |

|    |         |         |         |
|----|---------|---------|---------|
| H  | -1.9219 | -7.2978 | -2.3881 |
| H  | -2.6845 | -7.3376 | -3.8816 |
| H  | -3.0820 | -6.1362 | -2.7639 |
| C  | 3.6493  | -5.6002 | 1.4704  |
| H  | 4.1715  | -5.3806 | 2.3271  |
| C  | 4.6445  | -5.8846 | 0.4437  |
| C  | 2.8357  | -6.7694 | 1.7707  |
| H  | 2.1308  | -6.5662 | 2.5123  |
| H  | 2.3398  | -7.1370 | 0.9313  |
| H  | 3.4561  | -7.5365 | 2.1165  |
| H  | 4.2332  | -6.2850 | -0.4278 |
| H  | 5.3196  | -6.5938 | 0.8094  |
| H  | 5.1825  | -5.0273 | 0.1912  |
| C  | 0.3021  | -6.6954 | -1.4589 |
| H  | -0.2523 | -6.8261 | -2.3147 |
| C  | -0.3361 | -7.5055 | -0.4270 |
| C  | 1.6465  | -7.1685 | -1.7615 |
| H  | 2.0954  | -6.5959 | -2.5102 |
| H  | 2.2680  | -7.1704 | -0.9239 |
| H  | 1.5929  | -8.1558 | -2.1004 |
| H  | 0.2356  | -7.5908 | 0.4439  |
| H  | -0.4712 | -8.4753 | -0.7914 |
| H  | -1.2736 | -7.1227 | -0.1691 |
| Au | -1.3063 | -2.0951 | 1.2420  |
| Au | -2.4824 | -0.5842 | -1.3434 |
| N  | -4.8717 | -0.5403 | -3.0627 |
| N  | -5.0911 | -1.9014 | -1.2095 |
| C  | -4.4573 | -1.0541 | -1.9516 |
| C  | -4.0017 | 0.4114  | -3.6986 |
| H  | -3.1623 | 0.4697  | -3.0771 |
| C  | -3.5440 | -0.0305 | -5.0035 |
| H  | -2.8423 | 0.6522  | -5.3671 |
| H  | -4.3126 | -0.1022 | -5.7099 |
| H  | -3.0542 | -0.9494 | -4.9419 |
| C  | -4.5943 | 1.7382  | -3.7485 |
| H  | -4.9967 | 2.0017  | -2.8235 |
| H  | -5.3358 | 1.8347  | -4.4777 |
| H  | -3.8466 | 2.4260  | -3.9736 |
| C  | -4.5255 | -2.2858 | 0.0258  |
| N  | -3.3906 | -4.1020 | 1.1897  |
| N  | -1.9997 | -4.2920 | 3.0205  |
| C  | -2.3823 | -3.7298 | 1.9157  |
| C  | -3.6364 | -3.4561 | -0.0409 |
| C  | -0.8535 | -3.7272 | 3.6777  |
| C  | -1.1588 | -3.2145 | 5.0020  |
| H  | -1.4096 | -3.9636 | 5.6912  |
| H  | -1.9355 | -2.5159 | 4.9664  |
| H  | -0.3207 | -2.7084 | 5.3692  |
| C  | 0.2661  | -4.6559 | 3.7013  |
| H  | 1.1325  | -4.1268 | 3.9442  |
| H  | 0.4143  | -5.0832 | 2.7612  |
| H  | 0.1590  | -5.4197 | 4.4107  |
| H  | -5.3133 | -2.4825 | 0.6768  |
| H  | -3.9940 | -1.4738 | 0.4113  |
| H  | -4.0499 | -4.1641 | -0.6811 |
| H  | -2.7208 | -3.1627 | -0.4491 |
| H  | -0.5708 | -2.9123 | 3.0865  |
| C  | -2.4121 | -5.4622 | 3.7828  |
| H  | -1.7151 | -5.4457 | 4.5530  |
| C  | -2.1504 | -6.7479 | 3.1366  |
| C  | -3.6782 | -5.3500 | 4.5040  |
| H  | -3.7085 | -4.4576 | 5.0439  |
| H  | -4.5409 | -5.4024 | 3.9246  |
| H  | -3.7206 | -6.1363 | 5.1934  |
| H  | -2.8126 | -7.0142 | 2.3779  |
| H  | -2.2031 | -7.4970 | 3.8677  |
| H  | -1.1843 | -6.7594 | 2.7374  |
| C  | -6.0905 | -0.6363 | -3.8525 |

|    |         |         |         |
|----|---------|---------|---------|
| H  | -5.8682 | 0.0153  | -4.6315 |
| C  | -7.2753 | -0.0328 | -3.2444 |
| C  | -6.3015 | -1.9044 | -4.5430 |
| H  | -5.4297 | -2.1952 | -5.0370 |
| H  | -6.6134 | -2.6993 | -3.9473 |
| H  | -7.0411 | -1.7546 | -5.2680 |
| H  | -7.7247 | -0.5867 | -2.4860 |
| H  | -7.9922 | 0.1002  | -3.9921 |
| H  | -7.0428 | 0.9060  | -2.8574 |
| C  | -4.2513 | -5.2024 | 1.4550  |
| H  | -3.8688 | -5.6352 | 2.3049  |
| C  | -4.2053 | -6.2274 | 0.4182  |
| C  | -5.6179 | -4.8109 | 1.7699  |
| H  | -5.6456 | -4.0885 | 2.5226  |
| H  | -6.1314 | -4.4476 | 0.9389  |
| H  | -6.1435 | -5.6486 | 2.1084  |
| H  | -4.7175 | -5.9613 | -0.4511 |
| H  | -4.6594 | -7.0961 | 0.7781  |
| H  | -3.2213 | -6.4605 | 0.1610  |
| C  | -6.3845 | -2.4366 | -1.4671 |
| H  | -6.6910 | -1.9675 | -2.3293 |
| C  | -7.3584 | -2.0912 | -0.4391 |
| C  | -6.3774 | -3.8636 | -1.7540 |
| H  | -5.6801 | -4.1009 | -2.4935 |
| H  | -6.1782 | -4.4402 | -0.9090 |
| H  | -7.3224 | -4.1480 | -2.0990 |
| H  | -7.2414 | -2.6419 | 0.4407  |
| H  | -8.3192 | -2.2971 | -0.7957 |
| H  | -7.3135 | -1.0757 | -0.2015 |
| Au | -2.4089 | 0.6127  | 1.2645  |
| Au | -1.2875 | 2.1483  | -1.2573 |
| N  | -2.0025 | 4.2791  | -3.0835 |
| N  | -3.3660 | 4.1184  | -1.2306 |
| C  | -2.3714 | 3.7283  | -1.9683 |
| C  | -0.8723 | 3.6998  | -3.7498 |
| H  | -0.6089 | 2.8669  | -3.1757 |
| C  | -1.1920 | 3.2179  | -5.0813 |
| H  | -0.3681 | 2.6969  | -5.4588 |
| H  | -1.4257 | 3.9833  | -5.7561 |
| H  | -1.9836 | 2.5386  | -5.0518 |
| C  | 0.2653  | 4.6073  | -3.7460 |
| H  | 0.4164  | 5.0052  | -2.7944 |
| H  | 0.1711  | 5.3916  | -4.4309 |
| H  | 1.1223  | 4.0747  | -4.0004 |
| C  | -3.5993 | 3.4783  | 0.0021  |
| N  | -4.9942 | 1.8676  | 1.1606  |
| N  | -4.7309 | 0.5116  | 3.0081  |
| C  | -4.3254 | 1.0357  | 1.8941  |
| C  | -4.4584 | 2.2890  | -0.0734 |
| C  | -3.8463 | -0.4189 | 3.6536  |
| C  | -3.4079 | 0.0391  | 4.9614  |
| H  | -4.1784 | 0.0733  | 5.6682  |
| H  | -2.9627 | 0.9815  | 4.9043  |
| H  | -2.6754 | -0.6108 | 5.3224  |
| C  | -4.4190 | -1.7543 | 3.7051  |
| H  | -3.6646 | -2.4320 | 3.9437  |
| H  | -4.8039 | -2.0316 | 2.7753  |
| H  | -5.1671 | -1.8578 | 4.4299  |
| H  | -4.0352 | 4.1802  | 0.6340  |
| H  | -2.6790 | 3.2128  | 0.4209  |
| H  | -5.2624 | 2.4843  | -0.7041 |
| H  | -3.9183 | 1.4983  | -0.4909 |
| H  | -3.0016 | -0.4660 | 3.0388  |
| C  | -5.9549 | 0.5755  | 3.7913  |
| H  | -5.7190 | -0.0716 | 4.5696  |
| C  | -7.1196 | -0.0632 | 3.1804  |
| C  | -6.2039 | 1.8319  | 4.4922  |
| H  | -5.3436 | 2.1389  | 4.9967  |

|    |         |         |         |
|----|---------|---------|---------|
| H  | -6.5312 | 2.6249  | 3.9035  |
| H  | -6.9439 | 1.6547  | 5.2092  |
| H  | -7.5835 | 0.4744  | 2.4178  |
| H  | -7.8365 | -0.2156 | 3.9287  |
| H  | -6.8558 | -0.9973 | 2.7971  |
| C  | -2.4024 | 5.4613  | -3.8297 |
| H  | -1.7090 | 5.4444  | -4.6035 |
| C  | -2.1254 | 6.7407  | -3.1768 |
| C  | -3.6728 | 5.3662  | -4.5441 |
| H  | -3.7117 | 4.4778  | -5.0898 |
| H  | -4.5325 | 5.4208  | -3.9590 |
| H  | -3.7157 | 6.1570  | -5.2273 |
| H  | -2.7793 | 7.0129  | -2.4129 |
| H  | -2.1754 | 7.4910  | -3.9039 |
| H  | -1.1582 | 6.7430  | -2.7864 |
| C  | -6.2948 | 2.3717  | 1.4374  |
| H  | -6.5856 | 1.8888  | 2.2964  |
| C  | -7.2706 | 2.0175  | 0.4139  |
| C  | -6.3158 | 3.7964  | 1.7386  |
| H  | -5.6127 | 4.0431  | 2.4693  |
| H  | -6.1442 | 4.3860  | 0.8963  |
| H  | -7.2619 | 4.0546  | 2.1008  |
| H  | -7.1754 | 2.5837  | -0.4592 |
| H  | -8.2326 | 2.1956  | 0.7838  |
| H  | -7.2022 | 1.0063  | 0.1619  |
| C  | -4.2270 | 5.2192  | -1.4892 |
| H  | -3.8565 | 5.6483  | -2.3457 |
| C  | -4.1675 | 6.2446  | -0.4539 |
| C  | -5.5975 | 4.8282  | -1.7852 |
| H  | -5.6349 | 4.1153  | -2.5463 |
| H  | -6.0954 | 4.4517  | -0.9508 |
| H  | -6.1318 | 5.6684  | -2.1032 |
| H  | -4.6771 | 5.9797  | 0.4181  |
| H  | -4.6195 | 7.1163  | -0.8100 |
| H  | -3.1802 | 6.4709  | -0.2026 |
| Au | -0.1549 | 2.4971  | 1.2257  |
| Au | 1.5911  | 1.9200  | -1.2331 |
| N  | 3.5217  | 3.1766  | -3.0235 |
| N  | 2.9497  | 4.4511  | -1.1889 |
| C  | 2.8911  | 3.3728  | -1.9070 |
| C  | 3.3468  | 1.8990  | -3.6531 |
| H  | 2.6773  | 1.3805  | -3.0394 |
| C  | 2.7393  | 1.9998  | -4.9687 |
| H  | 2.5216  | 1.0417  | -5.3173 |
| H  | 3.3556  | 2.4624  | -5.6750 |
| H  | 1.8297  | 2.5093  | -4.9296 |
| C  | 4.5893  | 1.1433  | -3.6802 |
| H  | 5.0529  | 1.1583  | -2.7465 |
| H  | 5.2678  | 1.4823  | -4.4025 |
| H  | 4.3719  | 0.1491  | -3.9040 |
| C  | 2.2751  | 4.4985  | 0.0477  |
| N  | 0.3158  | 5.3284  | 1.2085  |
| N  | -0.8788 | 4.6449  | 3.0574  |
| C  | -0.2620 | 4.4217  | 1.9379  |
| C  | 0.8805  | 4.9562  | -0.0265 |
| C  | -1.4567 | 3.5080  | 3.7116  |
| C  | -0.9204 | 3.2926  | 5.0424  |
| H  | -1.1894 | 4.0400  | 5.7231  |
| H  | 0.1210  | 3.2116  | 5.0221  |
| H  | -1.2785 | 2.3839  | 5.4080  |
| C  | -2.9114 | 3.5777  | 3.7044  |
| H  | -3.2967 | 2.6424  | 3.9535  |
| H  | -3.2637 | 3.8166  | 2.7537  |
| H  | -3.2978 | 4.2671  | 4.3918  |
| H  | 2.8149  | 5.1374  | 0.6662  |
| H  | 2.3010  | 3.5482  | 0.4799  |
| H  | 0.8204  | 5.7836  | -0.6547 |
| H  | 0.2938  | 4.2013  | -0.4492 |

|    |         |         |         |
|----|---------|---------|---------|
| Au | -0.0168 | 0.0174  | -2.5638 |
| Au | -0.0057 | 0.0236  | -0.0024 |
| Au | 0.0029  | 0.0344  | 2.5587  |
| Cl | -0.0627 | -0.0075 | -4.8342 |
| Cl | 0.0732  | 0.0494  | 4.8286  |
| H  | -1.1780 | 2.6838  | 3.1300  |
| C  | -1.2396 | 5.8302  | 3.8170  |
| H  | -1.7966 | 5.4061  | 4.5844  |
| C  | -2.2087 | 6.7191  | 3.1723  |
| C  | -0.1501 | 6.4819  | 4.5405  |
| H  | 0.3929  | 5.7744  | 5.0824  |
| H  | 0.5243  | 7.0248  | 3.9621  |
| H  | -0.5757 | 7.1496  | 5.2266  |
| H  | -1.8314 | 7.3312  | 2.4191  |
| H  | -2.6101 | 7.3489  | 3.9049  |
| H  | -2.9935 | 6.1612  | 2.7691  |
| C  | 4.4791  | 3.9337  | -3.8144 |
| H  | 4.6693  | 3.2612  | -4.5831 |
| C  | 5.7968  | 4.1062  | -3.2031 |
| C  | 3.9451  | 5.0869  | -4.5321 |
| H  | 3.0803  | 4.8180  | -5.0501 |
| H  | 3.7250  | 5.9222  | -3.9526 |
| H  | 4.6572  | 5.3809  | -5.2385 |
| H  | 5.8596  | 4.8275  | -2.4560 |
| H  | 6.4684  | 4.3839  | -3.9541 |
| H  | 6.1267  | 3.2029  | -2.8008 |
| C  | 0.3837  | 6.7202  | 1.4858  |
| H  | -0.1642 | 6.8448  | 2.3457  |
| C  | -0.2605 | 7.5371  | 0.4640  |
| C  | 1.7291  | 7.1910  | 1.7835  |
| H  | 2.1822  | 6.6111  | 2.5233  |
| H  | 2.3455  | 7.2006  | 0.9427  |
| H  | 1.6769  | 8.1754  | 2.1317  |
| H  | 0.3073  | 7.6272  | -0.4087 |
| H  | -0.3951 | 8.5054  | 0.8352  |
| H  | -1.1986 | 7.1545  | 0.2099  |
| C  | 3.7124  | 5.6151  | -1.4785 |
| H  | 4.2187  | 5.3899  | -2.3438 |
| C  | 4.7244  | 5.8967  | -0.4667 |
| C  | 2.8978  | 6.7864  | -1.7713 |
| H  | 2.1776  | 6.5797  | -2.4982 |
| H  | 2.4200  | 7.1630  | -0.9247 |
| H  | 3.5139  | 7.5484  | -2.1354 |
| H  | 4.3281  | 6.3036  | 0.4092  |
| H  | 5.3987  | 6.5994  | -0.8446 |
| H  | 5.2594  | 5.0355  | -0.2177 |

275

4 Benzo T1 Excited State

|    |        |         |         |
|----|--------|---------|---------|
| Au | 2.2103 | 1.0916  | 1.1952  |
| Au | 2.4222 | -0.5598 | -1.2375 |
| N  | 4.4325 | -0.8353 | -3.4060 |
| N  | 5.2485 | -0.0392 | -1.6702 |
| C  | 4.1573 | -0.5268 | -2.1803 |
| C  | 5.6958 | -0.5222 | -3.6925 |
| C  | 6.2148 | -0.0034 | -2.5765 |
| C  | 3.5108 | -1.4501 | -4.2798 |
| H  | 2.6458 | -1.5392 | -3.7040 |
| C  | 3.2054 | -0.6034 | -5.4175 |
| H  | 2.4348 | -1.0395 | -5.9662 |
| H  | 4.0250 | -0.4719 | -6.0464 |
| H  | 2.8658 | 0.3282  | -5.1000 |
| C  | 3.9731 | -2.7754 | -4.6528 |
| H  | 4.0857 | -3.3831 | -3.8143 |
| H  | 4.8839 | -2.7457 | -5.1562 |
| H  | 3.2783 | -3.2158 | -5.2908 |
| C  | 5.3476 | 0.4371  | -0.3773 |
| N  | 4.8424 | 2.2836  | 0.9973  |
| N  | 4.0789 | 2.6442  | 2.8966  |

|    |         |         |         |
|----|---------|---------|---------|
| C  | 3.8016  | 2.1052  | 1.7553  |
| C  | 5.7970  | 2.9227  | 1.6594  |
| C  | 5.3077  | 3.1607  | 2.8785  |
| C  | 4.9358  | 1.8351  | -0.3063 |
| C  | 3.1725  | 2.6890  | 3.9778  |
| H  | 2.3364  | 2.1739  | 3.6283  |
| C  | 3.6863  | 1.9772  | 5.1316  |
| H  | 4.4677  | 2.4820  | 5.5986  |
| H  | 4.0208  | 1.0307  | 4.8582  |
| H  | 2.9133  | 1.8582  | 5.8202  |
| C  | 2.7946  | 4.0576  | 4.2781  |
| H  | 2.1042  | 4.0568  | 5.0575  |
| H  | 2.3545  | 4.5183  | 3.4541  |
| H  | 3.6083  | 4.6321  | 4.5801  |
| H  | 6.3248  | 0.3070  | -0.0451 |
| H  | 4.7146  | -0.1349 | 0.2202  |
| H  | 5.5982  | 2.4516  | -0.8198 |
| H  | 3.9952  | 1.9277  | -0.7442 |
| C  | 6.4332  | -0.6225 | -4.7952 |
| C  | 7.4658  | 0.4331  | -2.5178 |
| C  | 7.6795  | -0.1826 | -4.7379 |
| C  | 8.1903  | 0.3345  | -3.6198 |
| C  | 7.0143  | 3.3070  | 1.3012  |
| C  | 6.0387  | 3.8032  | 3.7851  |
| C  | 7.2518  | 4.1883  | 3.4281  |
| C  | 7.7341  | 3.9460  | 2.2067  |
| H  | 6.0614  | -1.0228 | -5.6710 |
| H  | 8.2739  | -0.2446 | -5.5814 |
| H  | 9.1709  | 0.6603  | -3.6138 |
| H  | 7.8665  | 0.8273  | -1.6498 |
| H  | 7.3903  | 3.1200  | 0.3567  |
| H  | 8.6880  | 4.2638  | 1.9668  |
| H  | 7.8434  | 4.6865  | 4.1140  |
| H  | 5.6883  | 3.9977  | 4.7359  |
| Au | -0.4799 | 2.3263  | 1.3030  |
| Au | 1.3595  | 2.0488  | -1.6652 |
| N  | 2.8445  | 4.0958  | -3.1028 |
| N  | 2.3787  | 4.7725  | -1.1944 |
| C  | 2.3058  | 3.7428  | -1.9794 |
| C  | 3.2457  | 5.3661  | -3.0463 |
| C  | 2.9415  | 5.7990  | -1.8203 |
| C  | 3.0272  | 3.2053  | -4.1829 |
| H  | 2.6237  | 2.3121  | -3.8226 |
| C  | 2.2656  | 3.6112  | -5.3491 |
| H  | 2.3661  | 2.8860  | -6.0912 |
| H  | 2.5957  | 4.5172  | -5.7428 |
| H  | 1.2544  | 3.6987  | -5.1174 |
| C  | 4.4368  | 3.0040  | -4.4633 |
| H  | 4.9508  | 2.6941  | -3.6117 |
| H  | 4.8933  | 3.8668  | -4.8256 |
| H  | 4.5389  | 2.2636  | -5.1890 |
| C  | 1.9107  | 4.7932  | 0.1060  |
| N  | 0.0258  | 5.1790  | 1.4563  |
| N  | -0.8608 | 4.5391  | 3.2241  |
| C  | -0.4722 | 4.1410  | 2.0569  |
| C  | -0.0126 | 6.2406  | 2.2499  |
| C  | -0.5980 | 5.8375  | 3.3808  |
| C  | 0.5049  | 5.1721  | 0.1596  |
| C  | -1.5625 | 3.7112  | 4.1295  |
| H  | -1.4865 | 2.7643  | 3.6992  |
| C  | -0.9333 | 3.6616  | 5.4342  |
| H  | -0.9890 | 4.5684  | 5.9411  |
| H  | 0.0601  | 3.3674  | 5.3572  |
| H  | -1.4203 | 2.9440  | 6.0109  |
| C  | -2.9590 | 4.1065  | 4.1849  |
| H  | -3.4817 | 3.4516  | 4.8040  |
| H  | -3.3946 | 4.0807  | 3.2393  |
| H  | -3.0725 | 5.0668  | 4.5716  |

|    |         |         |         |
|----|---------|---------|---------|
| H  | 2.4995  | 5.4510  | 0.6583  |
| H  | 2.0233  | 3.8369  | 0.5039  |
| H  | 0.3546  | 6.1171  | -0.2507 |
| H  | -0.0547 | 4.4828  | -0.3850 |
| C  | 3.8345  | 6.1755  | -3.9212 |
| C  | 3.2127  | 7.0352  | -1.4235 |
| C  | 4.1006  | 7.4107  | -3.5269 |
| C  | 3.7983  | 7.8347  | -2.2975 |
| C  | 0.4043  | 7.4889  | 2.0774  |
| C  | -0.8057 | 6.6966  | 4.3749  |
| C  | -0.3885 | 7.9393  | 4.2055  |
| C  | 0.2100  | 8.3307  | 3.0783  |
| H  | 4.0762  | 5.8701  | -4.8765 |
| H  | 4.5552  | 8.0625  | -4.1872 |
| H  | 4.0272  | 8.8060  | -2.0260 |
| H  | 2.9837  | 7.3643  | -0.4707 |
| H  | 0.8563  | 7.7995  | 1.2008  |
| H  | 0.5219  | 9.3120  | 2.9856  |
| H  | -0.5321 | 8.6254  | 4.9653  |
| H  | -1.2743 | 6.4201  | 5.2525  |
| Au | -2.2784 | 0.2533  | 1.2021  |
| Au | -1.4690 | 1.7818  | -1.2457 |
| N  | -2.8861 | 3.4463  | -3.2464 |
| N  | -3.9555 | 3.2628  | -1.4736 |
| C  | -2.8180 | 2.9841  | -2.0402 |
| C  | -4.0794 | 3.9981  | -3.4666 |
| C  | -4.7659 | 3.8728  | -2.3274 |
| C  | -1.7932 | 3.4323  | -4.1397 |
| H  | -1.0416 | 2.9597  | -3.5914 |
| C  | -2.0661 | 2.6307  | -5.3175 |
| H  | -1.2184 | 2.6173  | -5.9244 |
| H  | -2.8552 | 3.0097  | -5.8812 |
| H  | -2.2722 | 1.6447  | -5.0561 |
| C  | -1.3727 | 4.7892  | -4.4435 |
| H  | -1.1523 | 5.3159  | -3.5727 |
| H  | -2.0981 | 5.3187  | -4.9697 |
| H  | -0.5162 | 4.7633  | -5.0347 |
| C  | -4.2593 | 2.9546  | -0.1587 |
| N  | -5.0017 | 1.2464  | 1.2834  |
| N  | -4.5446 | 0.3635  | 3.1085  |
| C  | -4.0899 | 0.5683  | 1.9149  |
| C  | -6.0274 | 1.5057  | 2.0821  |
| C  | -5.7382 | 0.9374  | 3.2563  |
| C  | -4.8922 | 1.6441  | -0.0385 |
| C  | -3.8738 | -0.4323 | 4.0620  |
| H  | -3.0156 | -0.7420 | 3.5555  |
| C  | -3.4627 | 0.3410  | 5.2184  |
| H  | -4.2738 | 0.7219  | 5.7493  |
| H  | -2.8403 | 1.1253  | 4.9349  |
| H  | -2.9162 | -0.2708 | 5.8614  |
| C  | -4.6691 | -1.5996 | 4.4009  |
| H  | -4.1249 | -2.2136 | 5.0417  |
| H  | -4.9116 | -2.1496 | 3.5502  |
| H  | -5.5533 | -1.3470 | 4.8883  |
| H  | -4.8643 | 3.7086  | 0.2277  |
| H  | -3.3637 | 2.9411  | 0.3717  |
| H  | -5.8414 | 1.6350  | -0.4663 |
| H  | -4.2998 | 0.9415  | -0.5278 |
| C  | -4.6334 | 4.5776  | -4.5277 |
| C  | -6.0120 | 4.3094  | -2.2050 |
| C  | -5.8780 | 5.0114  | -4.4071 |
| C  | -6.5583 | 4.8805  | -3.2649 |
| C  | -7.1548 | 2.1746  | 1.8844  |
| C  | -6.5845 | 1.0303  | 4.2782  |
| C  | -7.7065 | 1.7021  | 4.0819  |
| C  | -7.9897 | 2.2649  | 2.9054  |
| H  | -4.1268 | 4.6892  | -5.4202 |
| H  | -6.3341 | 5.4638  | -5.2180 |

|    |         |         |         |
|----|---------|---------|---------|
| H  | -7.5285 | 5.2333  | -3.2094 |
| H  | -6.5409 | 4.2138  | -1.3215 |
| H  | -7.3789 | 2.6106  | 0.9744  |
| H  | -8.8784 | 2.7797  | 2.7904  |
| H  | -8.3822 | 1.7894  | 4.8593  |
| H  | -6.3856 | 0.6033  | 5.1970  |
| Au | -0.9076 | -2.2489 | 1.6482  |
| Au | -2.1317 | -0.9106 | -1.3372 |
| N  | -4.2764 | -1.7597 | -3.1833 |
| N  | -4.3645 | -2.7487 | -1.3567 |
| C  | -3.7035 | -1.8567 | -2.0286 |
| C  | -5.3073 | -2.6025 | -3.2590 |
| C  | -5.3542 | -3.2446 | -2.0875 |
| C  | -3.9058 | -0.8059 | -4.1582 |
| H  | -3.0408 | -0.3776 | -3.7639 |
| C  | -3.5616 | -1.4232 | -5.4234 |
| H  | -3.1970 | -0.6876 | -6.0639 |
| H  | -4.3782 | -1.8753 | -5.8841 |
| H  | -2.8045 | -2.1239 | -5.2988 |
| C  | -4.9363 | 0.2100  | -4.2811 |
| H  | -5.1223 | 0.6692  | -3.3645 |
| H  | -5.8315 | -0.1865 | -4.6362 |
| H  | -4.6239 | 0.9401  | -4.9549 |
| C  | -4.0624 | -3.1284 | -0.0609 |
| N  | -2.7217 | -4.5352 | 1.2607  |
| N  | -1.8237 | -4.5794 | 3.1350  |
| C  | -1.8483 | -3.9378 | 2.0100  |
| C  | -3.2783 | -5.5511 | 1.9106  |
| C  | -2.7002 | -5.5828 | 3.1153  |
| C  | -3.0255 | -4.1525 | -0.0326 |
| C  | -0.9168 | -4.2760 | 4.1745  |
| H  | -0.3789 | -3.4684 | 3.7896  |
| C  | -1.5996 | -3.8375 | 5.3772  |
| H  | -2.1925 | -4.5868 | 5.7917  |
| H  | -2.1985 | -3.0087 | 5.1821  |
| H  | -0.8908 | -3.5614 | 6.0904  |
| C  | -0.0035 | -5.3795 | 4.4096  |
| H  | 0.7231  | -5.0834 | 5.0949  |
| H  | 0.4776  | -5.6655 | 3.5313  |
| H  | -0.4876 | -6.2126 | 4.8028  |
| H  | -4.9355 | -3.4651 | 0.3941  |
| H  | -3.7261 | -2.2863 | 0.4523  |
| H  | -3.3174 | -4.9973 | -0.5658 |
| H  | -2.1585 | -3.7718 | -0.4668 |
| C  | -6.2011 | -2.8667 | -4.2076 |
| C  | -6.2696 | -4.1678 | -1.8271 |
| C  | -7.1124 | -3.7895 | -3.9492 |
| C  | -7.1471 | -4.4317 | -2.7797 |
| C  | -4.2018 | -6.4330 | 1.5524  |
| C  | -3.0457 | -6.5079 | 4.0062  |
| C  | -3.9693 | -7.3843 | 3.6506  |
| C  | -4.5371 | -7.3519 | 2.4425  |
| H  | -6.1973 | -2.3791 | -5.1169 |
| H  | -7.8161 | -4.0154 | -4.6720 |
| H  | -7.8759 | -5.1454 | -2.6150 |
| H  | -6.3055 | -4.6623 | -0.9196 |
| H  | -4.6403 | -6.4154 | 0.6169  |
| H  | -5.2523 | -8.0576 | 2.1988  |
| H  | -4.2567 | -8.1114 | 4.3257  |
| H  | -2.6203 | -6.5519 | 4.9461  |
| Au | 1.8225  | -1.6774 | 1.2339  |
| Au | 0.3456  | -2.4216 | -1.2030 |
| N  | 0.0886  | -4.8752 | -2.8568 |
| N  | 0.7993  | -5.2719 | -0.9456 |
| C  | 0.3769  | -4.3212 | -1.7249 |
| C  | 0.3409  | -6.1831 | -2.8115 |
| C  | 0.8019  | -6.4333 | -1.5845 |
| C  | -0.4354 | -4.1697 | -3.9601 |



|                           |         |         |         |
|---------------------------|---------|---------|---------|
| H                         | -0.4841 | -3.1821 | -3.6311 |
| C                         | 0.4652  | -4.2186 | -5.0952 |
| H                         | 0.1434  | -3.5271 | -5.8051 |
| H                         | 0.4960  | -5.1581 | -5.5423 |
| H                         | 1.4306  | -3.9578 | -4.8072 |
| C                         | -1.7737 | -4.6319 | -4.2769 |
| H                         | -2.4200 | -4.4992 | -3.4712 |
| H                         | -1.7876 | -5.6364 | -4.5468 |
| H                         | -2.1408 | -4.0860 | -5.0835 |
| C                         | 1.2388  | -5.0775 | 0.3490  |
| N                         | 3.0023  | -4.2967 | 1.6737  |
| N                         | 3.2343  | -3.1604 | 3.3959  |
| C                         | 2.7946  | -3.1171 | 2.1792  |
| C                         | 3.5488  | -5.1044 | 2.5708  |
| C                         | 3.7065  | -4.3752 | 3.6786  |
| C                         | 2.6353  | -4.6566 | 0.3919  |
| C                         | 3.2186  | -2.0554 | 4.2721  |
| H                         | 2.7914  | -1.2936 | 3.7020  |
| C                         | 2.3585  | -2.2949 | 5.4160  |
| H                         | 2.7285  | -3.0408 | 6.0421  |
| H                         | 1.3991  | -2.5551 | 5.1053  |
| H                         | 2.2730  | -1.4148 | 5.9663  |
| C                         | 4.5738  | -1.6787 | 4.6358  |
| H                         | 4.5440  | -0.8648 | 5.2836  |
| H                         | 5.1283  | -1.4138 | 3.7950  |
| H                         | 5.0765  | -2.4470 | 5.1264  |
| H                         | 1.0921  | -5.9587 | 0.8826  |
| H                         | 0.6510  | -4.3324 | 0.7790  |
| H                         | 3.2733  | -5.4069 | 0.0580  |
| H                         | 2.7562  | -3.8218 | -0.2195 |
| Au                        | 0.1196  | 0.0228  | -2.7332 |
| Au                        | 0.0809  | -0.0134 | -0.0110 |
| Au                        | 0.0693  | -0.0722 | 2.7089  |
| Cl                        | -0.3052 | -0.7284 | -4.8384 |
| Cl                        | 0.3827  | 0.6231  | 4.8498  |
| C                         | 0.2201  | -7.1664 | -3.7001 |
| C                         | 1.1577  | -7.6519 | -1.1986 |
| C                         | 0.5739  | -8.3813 | -3.3164 |
| C                         | 1.0356  | -8.6235 | -2.0857 |
| C                         | 3.9116  | -6.3792 | 2.5096  |
| C                         | 4.2419  | -4.9146 | 4.7702  |
| C                         | 4.6038  | -6.1857 | 4.7098  |
| C                         | 4.4436  | -6.9081 | 3.5995  |
| H                         | -0.1295 | -7.0027 | -4.6568 |
| H                         | 0.4923  | -9.1647 | -3.9863 |
| H                         | 1.3040  | -9.5872 | -1.8238 |
| H                         | 1.5146  | -7.8414 | -0.2474 |
| H                         | 3.7926  | -6.9409 | 1.6492  |
| H                         | 4.7420  | -7.8975 | 3.5905  |
| H                         | 5.0219  | -6.6292 | 5.5452  |
| H                         | 4.3755  | -4.3774 | 5.6411  |
| 255                       |         |         |         |
| 5 BenzoN T1 Excited State |         |         |         |
| Au                        | 2.3025  | 0.7476  | 1.2724  |
| Au                        | 2.2554  | -0.8594 | -1.1504 |
| N                         | 4.2260  | -1.8291 | -3.1170 |
| N                         | 5.1314  | -0.9643 | -1.4383 |
| C                         | 3.9822  | -1.3006 | -1.9584 |
| C                         | 5.5308  | -1.8189 | -3.3441 |
| C                         | 6.1047  | -1.2607 | -2.2773 |
| C                         | 3.2400  | -2.3698 | -3.9746 |
| H                         | 2.3456  | -2.1643 | -3.4774 |
| C                         | 3.2399  | -1.6926 | -5.2557 |
| H                         | 2.4658  | -2.0724 | -5.8400 |
| H                         | 4.1373  | -1.8426 | -5.7602 |
| H                         | 3.0689  | -0.6726 | -5.1403 |
| C                         | 3.4241  | -3.8049 | -4.0895 |
| H                         | 3.4104  | -4.2640 | -3.1548 |

|    |         |         |         |
|----|---------|---------|---------|
| H  | 4.3257  | -4.0294 | -4.5587 |
| H  | 2.6540  | -4.2063 | -4.6641 |
| C  | 5.3124  | -0.4511 | -0.1625 |
| N  | 5.0929  | 1.4600  | 1.1747  |
| N  | 4.3052  | 2.0014  | 3.0402  |
| C  | 3.9857  | 1.5559  | 1.8637  |
| C  | 6.1156  | 1.8269  | 1.9199  |
| C  | 5.6155  | 2.1754  | 3.1087  |
| C  | 5.1855  | 1.0029  | -0.1311 |
| C  | 3.3729  | 2.3292  | 4.0531  |
| H  | 2.4529  | 2.0868  | 3.6264  |
| C  | 3.5779  | 1.5149  | 5.2342  |
| H  | 4.5041  | 1.7057  | 5.6673  |
| H  | 3.5036  | 0.5030  | 5.0029  |
| H  | 2.8346  | 1.7343  | 5.9309  |
| C  | 3.4346  | 3.7527  | 4.3320  |
| H  | 2.7035  | 4.0022  | 5.0307  |
| H  | 3.2713  | 4.3135  | 3.4683  |
| H  | 4.3598  | 4.0120  | 4.7306  |
| H  | 6.2568  | -0.7417 | 0.1629  |
| H  | 4.5826  | -0.8737 | 0.4484  |
| H  | 6.0131  | 1.4583  | -0.5678 |
| H  | 4.3185  | 1.2927  | -0.6297 |
| N  | 6.1815  | -2.2334 | -4.3408 |
| N  | 7.3417  | -1.0752 | -2.1485 |
| C  | 7.4418  | -2.0522 | -4.2255 |
| C  | 8.0100  | -1.4848 | -3.1579 |
| N  | 7.3364  | 1.8707  | 1.6184  |
| N  | 6.3261  | 2.5914  | 4.0630  |
| C  | 7.5713  | 2.6392  | 3.7728  |
| C  | 8.0650  | 2.2889  | 2.5828  |
| H  | 8.0305  | -2.3698 | -5.0144 |
| H  | 9.0373  | -1.3593 | -3.1208 |
| H  | 9.0823  | 2.3482  | 2.4054  |
| H  | 8.2080  | 2.9708  | 4.5174  |
| Au | -0.2537 | 2.3903  | 1.3582  |
| Au | 1.5192  | 1.8269  | -1.2848 |
| N  | 2.9169  | 3.5032  | -3.2098 |
| N  | 2.6085  | 4.5204  | -1.4012 |
| C  | 2.4543  | 3.3759  | -2.0053 |
| C  | 3.3489  | 4.7438  | -3.3840 |
| C  | 3.1468  | 5.3903  | -2.2346 |
| C  | 3.0191  | 2.4440  | -4.1479 |
| H  | 2.5606  | 1.6436  | -3.6603 |
| C  | 2.2872  | 2.7400  | -5.3626 |
| H  | 2.3589  | 1.9224  | -6.0037 |
| H  | 2.6784  | 3.5750  | -5.8453 |
| H  | 1.2765  | 2.8876  | -5.1638 |
| C  | 4.4166  | 2.1377  | -4.3932 |
| H  | 4.9231  | 1.9330  | -3.5061 |
| H  | 4.8930  | 2.9266  | -4.8778 |
| H  | 4.4783  | 1.2987  | -5.0079 |
| C  | 2.2988  | 4.7691  | -0.0718 |
| N  | 0.5327  | 5.1946  | 1.4193  |
| N  | -0.2879 | 4.5939  | 3.2548  |
| C  | -0.0187 | 4.1966  | 2.0502  |
| C  | 0.6407  | 6.2270  | 2.2354  |
| C  | 0.1111  | 5.8484  | 3.4019  |
| C  | 0.9093  | 5.1804  | 0.0848  |
| C  | -0.9956 | 3.8229  | 4.2130  |
| H  | -1.1135 | 2.9002  | 3.7407  |
| C  | -0.2241 | 3.6397  | 5.4254  |
| H  | -0.0333 | 4.5495  | 5.8936  |
| H  | 0.6714  | 3.1480  | 5.2292  |
| H  | -0.7689 | 3.0395  | 6.0799  |
| C  | -2.2972 | 4.4163  | 4.4580  |
| H  | -2.8413 | 3.7951  | 5.0941  |
| H  | -2.8349 | 4.5305  | 3.5726  |

|    |         |         |         |
|----|---------|---------|---------|
| H  | -2.2050 | 5.3457  | 4.9183  |
| H  | 2.9435  | 5.5116  | 0.2664  |
| H  | 2.4667  | 3.8900  | 0.4588  |
| H  | 0.7606  | 6.1363  | -0.2972 |
| H  | 0.2863  | 4.5059  | -0.4049 |
| N  | 3.8618  | 5.2842  | -4.4003 |
| N  | 3.4332  | 6.5979  | -2.0371 |
| C  | 4.1563  | 6.5135  | -4.2175 |
| C  | 3.9465  | 7.1570  | -3.0648 |
| N  | 1.1387  | 7.3592  | 2.0131  |
| N  | 0.0465  | 6.6025  | 4.4093  |
| C  | 0.5487  | 7.7589  | 4.1991  |
| C  | 1.0841  | 8.1291  | 3.0319  |
| H  | 4.5793  | 7.0139  | -5.0185 |
| H  | 4.2045  | 8.1542  | -2.9748 |
| H  | 1.4790  | 9.0796  | 2.9212  |
| H  | 0.5276  | 8.4253  | 4.9918  |
| Au | -2.3775 | 0.6292  | 1.1471  |
| Au | -1.4457 | 1.9524  | -1.2408 |
| N  | -2.2596 | 4.1855  | -2.9888 |
| N  | -3.2574 | 4.1969  | -1.1452 |
| C  | -2.3044 | 3.6105  | -1.8238 |
| C  | -3.1902 | 5.1239  | -3.0603 |
| C  | -3.8276 | 5.1268  | -1.8862 |
| C  | -1.3130 | 3.8845  | -3.9948 |
| H  | -0.7268 | 3.1360  | -3.5647 |
| C  | -1.9660 | 3.3560  | -5.1759 |
| H  | -1.2403 | 3.0829  | -5.8719 |
| H  | -2.5915 | 4.0672  | -5.6092 |
| H  | -2.5165 | 2.5033  | -4.9440 |
| C  | -0.5012 | 5.0551  | -4.2738 |
| H  | -0.0405 | 5.4107  | -3.4093 |
| H  | -1.0785 | 5.8186  | -4.6831 |
| H  | 0.2389  | 4.8061  | -4.9619 |
| C  | -3.6378 | 3.8711  | 0.1465  |
| N  | -4.7708 | 2.2465  | 1.4235  |
| N  | -4.5306 | 1.0431  | 3.1240  |
| C  | -4.0239 | 1.3182  | 1.9597  |
| C  | -5.7386 | 2.5761  | 2.2555  |
| C  | -5.5911 | 1.8061  | 3.3383  |
| C  | -4.6037 | 2.7762  | 0.1534  |
| C  | -4.0395 | 0.0455  | 3.9984  |
| H  | -3.2289 | -0.3560 | 3.4778  |
| C  | -3.5647 | 0.6327  | 5.2371  |
| H  | -4.3444 | 1.0791  | 5.7636  |
| H  | -2.8169 | 1.3342  | 5.0532  |
| H  | -3.1490 | -0.1146 | 5.8328  |
| C  | -5.0515 | -0.9757 | 4.2031  |
| H  | -4.6619 | -1.7319 | 4.8050  |
| H  | -5.3521 | -1.3981 | 3.2983  |
| H  | -5.8874 | -0.5824 | 4.6834  |
| H  | -4.0467 | 4.7252  | 0.5786  |
| H  | -2.7824 | 3.5866  | 0.6674  |
| H  | -5.5353 | 3.1064  | -0.1727 |
| H  | -4.2629 | 2.0092  | -0.4635 |
| N  | -3.4783 | 5.9071  | -4.0077 |
| N  | -4.7781 | 5.8968  | -1.5924 |
| C  | -4.4464 | 6.6962  | -3.7246 |
| C  | -5.0799 | 6.6927  | -2.5502 |
| N  | -6.6472 | 3.4326  | 2.1066  |
| N  | -6.3609 | 1.8587  | 4.3372  |
| C  | -7.2927 | 2.7253  | 4.1999  |
| C  | -7.4341 | 3.4920  | 3.1146  |
| H  | -4.7342 | 7.3626  | -4.4645 |
| H  | -5.8560 | 7.3544  | -2.3804 |
| H  | -8.2101 | 4.1751  | 3.0597  |
| H  | -7.9591 | 2.8166  | 4.9869  |
| Au | -1.3177 | -1.9999 | 1.2659  |

|    |         |         |         |
|----|---------|---------|---------|
| Au | -2.4411 | -0.5311 | -1.3289 |
| N  | -4.4196 | -1.2778 | -3.3602 |
| N  | -4.7489 | -2.3033 | -1.5603 |
| C  | -3.9529 | -1.4596 | -2.1610 |
| C  | -5.5031 | -2.0185 | -3.5306 |
| C  | -5.7067 | -2.6777 | -2.3866 |
| C  | -3.8941 | -0.3535 | -4.2962 |
| H  | -3.0417 | 0.0194  | -3.8238 |
| C  | -3.5042 | -1.0116 | -5.5275 |
| H  | -3.0759 | -0.3062 | -6.1628 |
| H  | -4.3256 | -1.4368 | -6.0064 |
| H  | -2.7849 | -1.7426 | -5.3477 |
| C  | -4.8486 | 0.7206  | -4.5106 |
| H  | -5.0847 | 1.2009  | -3.6158 |
| H  | -5.7256 | 0.3615  | -4.9442 |
| H  | -4.4344 | 1.4217  | -5.1602 |
| C  | -4.6255 | -2.7123 | -0.2422 |
| N  | -3.3524 | -4.0745 | 1.2037  |
| N  | -2.3737 | -4.0626 | 3.0573  |
| C  | -2.3897 | -3.5148 | 1.8816  |
| C  | -3.9700 | -4.9606 | 1.9611  |
| C  | -3.3452 | -4.9580 | 3.1405  |
| C  | -3.6693 | -3.8051 | -0.1198 |
| C  | -1.4068 | -3.7991 | 4.0588  |
| H  | -0.7863 | -3.0858 | 3.6170  |
| C  | -2.0213 | -3.2306 | 5.2401  |
| H  | -2.6831 | -3.9023 | 5.6820  |
| H  | -2.5219 | -2.3475 | 5.0102  |
| H  | -1.2762 | -2.9980 | 5.9298  |
| C  | -0.6538 | -5.0075 | 4.3423  |
| H  | 0.1054  | -4.7874 | 5.0203  |
| H  | -0.2191 | -5.3954 | 3.4784  |
| H  | -1.2632 | -5.7361 | 4.7679  |
| H  | -5.5680 | -3.0078 | 0.0836  |
| H  | -4.2993 | -1.8959 | 0.3155  |
| H  | -4.0610 | -4.6773 | -0.5292 |
| H  | -2.7860 | -3.5513 | -0.6078 |
| N  | -6.2452 | -2.1416 | -4.5436 |
| N  | -6.6428 | -3.4936 | -2.1895 |
| C  | -7.2028 | -2.9706 | -4.3596 |
| C  | -7.3977 | -3.6300 | -3.2144 |
| N  | -4.9519 | -5.6923 | 1.6759  |
| N  | -3.6808 | -5.7005 | 4.1043  |
| C  | -4.6791 | -6.4486 | 3.8320  |
| C  | -5.3013 | -6.4454 | 2.6480  |
| H  | -7.8465 | -3.1184 | -5.1574 |
| H  | -8.1906 | -4.2875 | -3.1232 |
| H  | -6.1057 | -7.0732 | 2.4851  |
| H  | -5.0040 | -7.0825 | 4.5836  |
| Au | 1.5814  | -1.8359 | 1.3198  |
| Au | -0.1935 | -2.3812 | -1.3343 |
| N  | -0.4739 | -4.6959 | -3.1013 |
| N  | 0.3199  | -5.2429 | -1.2397 |
| C  | -0.1667 | -4.2466 | -1.9241 |
| C  | -0.1518 | -5.9788 | -3.1801 |
| C  | 0.3578  | -6.3238 | -1.9960 |
| C  | -1.1277 | -3.9407 | -4.1072 |
| H  | -1.2586 | -3.0055 | -3.6628 |
| C  | -0.2903 | -3.7977 | -5.2803 |
| H  | -0.7802 | -3.1945 | -5.9746 |
| H  | -0.0991 | -4.7209 | -5.7227 |
| H  | 0.6080  | -3.3303 | -5.0412 |
| C  | -2.4185 | -4.5335 | -4.4063 |
| H  | -3.0012 | -4.6285 | -3.5476 |
| H  | -2.3062 | -5.4725 | -4.8418 |
| H  | -2.9276 | -3.9241 | -5.0811 |
| C  | 0.7133  | -5.1889 | 0.0891  |
| N  | 2.4697  | -4.6057 | 1.5315  |

|    |         |         |         |
|----|---------|---------|---------|
| N  | 2.8217  | -3.5805 | 3.3256  |
| C  | 2.3329  | -3.4542 | 2.1297  |
| C  | 3.0225  | -5.4744 | 2.3566  |
| C  | 3.2536  | -4.8213 | 3.4981  |
| C  | 2.1277  | -4.8618 | 0.2138  |
| C  | 2.9628  | -2.5182 | 4.2524  |
| H  | 2.4996  | -1.7133 | 3.7771  |
| C  | 2.2656  | -2.8007 | 5.4908  |
| H  | 2.6672  | -3.6331 | 5.9699  |
| H  | 1.2493  | -2.9474 | 5.3215  |
| H  | 2.3563  | -1.9770 | 6.1212  |
| C  | 4.3730  | -2.2315 | 4.4474  |
| H  | 4.4720  | -1.4170 | 5.0878  |
| H  | 4.8400  | -1.9985 | 3.5459  |
| H  | 4.8624  | -3.0415 | 4.8818  |
| H  | 0.5118  | -6.1170 | 0.5162  |
| H  | 0.1400  | -4.4539 | 0.5543  |
| H  | 2.7192  | -5.6523 | -0.1152 |
| H  | 2.3396  | -4.0063 | -0.3417 |
| Au | 0.0254  | -0.0096 | -2.6442 |
| Au | -0.0125 | -0.0027 | 0.0027  |
| Au | -0.0626 | 0.0262  | 2.6500  |
| Cl | -0.1123 | 0.0436  | -4.8767 |
| Cl | 0.1081  | 0.0035  | 4.8817  |
| N  | -0.2665 | -6.7832 | -4.1442 |
| N  | 0.7796  | -7.4733 | -1.7082 |
| C  | 0.1597  | -7.9558 | -3.8689 |
| C  | 0.6721  | -8.2939 | -2.6818 |
| N  | 3.2956  | -6.6851 | 2.1595  |
| N  | 3.7828  | -5.3597 | 4.5084  |
| C  | 4.0640  | -6.5942 | 4.3254  |
| C  | 3.8267  | -7.2419 | 3.1822  |
| H  | 0.0947  | -8.6629 | -4.6230 |
| H  | 1.0042  | -9.2596 | -2.5186 |
| H  | 4.0756  | -8.2423 | 3.0921  |
| H  | 4.4983  | -7.0939 | 5.1210  |

215

6 NHC-O T1 Excited State

|    |         |        |         |
|----|---------|--------|---------|
| Au | -1.4838 | 1.9511 | 1.1992  |
| Au | 0.1183  | 2.4129 | -1.2204 |
| N  | 0.4950  | 4.6628 | -3.1060 |
| N  | -0.4312 | 5.2853 | -1.3149 |
| C  | 0.0623  | 4.2500 | -1.9425 |
| C  | 0.2484  | 5.9654 | -3.2763 |
| O  | 0.5125  | 6.5089 | -4.1938 |
| C  | -0.3764 | 6.3793 | -2.0663 |
| O  | -0.7588 | 7.3495 | -1.7111 |
| C  | 1.1988  | 3.8274 | -4.0211 |
| H  | 1.2327  | 2.8681 | -3.5653 |
| C  | 0.4555  | 3.7081 | -5.2757 |
| H  | 0.9746  | 3.0544 | -5.9233 |
| H  | 0.3544  | 4.6153 | -5.7404 |
| H  | -0.4900 | 3.2813 | -5.1141 |
| C  | 2.5483  | 4.3275 | -4.2277 |
| H  | 3.0483  | 4.3956 | -3.3316 |
| H  | 2.5378  | 5.2404 | -4.6734 |
| H  | 3.0731  | 3.6612 | -4.8503 |
| C  | -0.9307 | 5.2450 | -0.0106 |
| N  | -2.7317 | 4.4707 | 1.3172  |
| N  | -3.0903 | 3.3965 | 3.0824  |
| C  | -2.5135 | 3.3806 | 1.9456  |
| C  | -3.4300 | 5.3765 | 2.0244  |
| O  | -3.7625 | 6.4447 | 1.7417  |
| C  | -3.7138 | 4.6272 | 3.3224  |
| O  | -4.3019 | 4.9861 | 4.2495  |
| C  | -2.3266 | 4.7823 | 0.0144  |
| C  | -3.1934 | 2.3653 | 4.0286  |
| H  | -2.6654 | 1.5919 | 3.5771  |

|    |         |         |         |
|----|---------|---------|---------|
| C  | -2.5442 | 2.6913  | 5.2888  |
| H  | -3.0326 | 3.4961  | 5.7598  |
| H  | -1.5413 | 2.9299  | 5.1467  |
| H  | -2.5973 | 1.8668  | 5.9254  |
| C  | -4.5762 | 1.9471  | 4.1926  |
| H  | -4.6247 | 1.1211  | 4.8299  |
| H  | -5.0201 | 1.7169  | 3.2793  |
| H  | -5.1405 | 2.7252  | 4.6430  |
| H  | -0.8544 | 6.1874  | 0.3523  |
| H  | -0.3388 | 4.5910  | 0.5537  |
| H  | -2.9551 | 5.5152  | -0.3374 |
| H  | -2.4287 | 3.9199  | -0.5483 |
| Au | 2.3285  | -0.6489 | 1.2075  |
| Au | 1.3827  | -2.0078 | -1.2128 |
| N  | 2.3086  | -4.0030 | -3.1087 |
| N  | 3.4430  | -3.9793 | -1.3193 |
| C  | 2.4270  | -3.4432 | -1.9419 |
| C  | 3.2823  | -4.9294 | -3.3107 |
| O  | 3.4510  | -5.5977 | -4.2706 |
| C  | 4.0721  | -4.9220 | -2.0575 |
| O  | 4.9864  | -5.5585 | -1.7439 |
| C  | 1.2683  | -3.7586 | -4.0485 |
| H  | 0.7025  | -3.0162 | -3.5799 |
| C  | 1.7900  | -3.2471 | -5.2980 |
| H  | 0.9891  | -3.0331 | -5.9315 |
| H  | 2.3999  | -3.9433 | -5.7784 |
| H  | 2.3176  | -2.3567 | -5.1522 |
| C  | 0.4615  | -4.9543 | -4.2180 |
| H  | 0.0926  | -5.3059 | -3.3108 |
| H  | 1.0081  | -5.7254 | -4.6741 |
| H  | -0.3390 | -4.7414 | -4.8475 |
| C  | 3.8348  | -3.6871 | -0.0202 |
| N  | 4.8413  | -2.0227 | 1.2993  |
| N  | 4.5122  | -0.9526 | 3.1039  |
| C  | 4.0238  | -1.2605 | 1.9560  |
| C  | 5.9535  | -2.3754 | 2.0359  |
| O  | 6.8183  | -3.0528 | 1.7551  |
| C  | 5.6880  | -1.5929 | 3.3342  |
| O  | 6.3705  | -1.5916 | 4.2747  |
| C  | 4.6967  | -2.5035 | 0.0159  |
| C  | 3.9663  | -0.0678 | 4.0433  |
| H  | 3.1014  | 0.2770  | 3.5652  |
| C  | 3.5990  | -0.7530 | 5.2734  |
| H  | 4.4348  | -1.1468 | 5.7486  |
| H  | 2.9136  | -1.5070 | 5.0837  |
| H  | 3.1523  | -0.0694 | 5.9148  |
| C  | 4.8783  | 1.0462  | 4.2677  |
| H  | 4.4249  | 1.7448  | 4.8946  |
| H  | 5.1294  | 1.5211  | 3.3684  |
| H  | 5.7608  | 0.7287  | 4.7320  |
| H  | 4.3461  | -4.5138 | 0.3364  |
| H  | 2.9916  | -3.5214 | 0.5354  |
| H  | 5.6565  | -2.7212 | -0.3536 |
| H  | 4.2741  | -1.7300 | -0.5491 |
| Au | 1.3472  | 1.9923  | 1.1977  |
| Au | 2.2690  | 0.6154  | -1.1993 |
| N  | 4.5044  | 0.9819  | -3.0934 |
| N  | 4.8079  | 2.0322  | -1.3447 |
| C  | 4.0379  | 1.2422  | -1.9456 |
| C  | 5.7030  | 1.6381  | -3.3399 |
| O  | 6.3456  | 1.6065  | -4.2764 |
| C  | 5.9119  | 2.3817  | -2.1069 |
| O  | 6.7602  | 3.0677  | -1.8317 |
| C  | 3.9725  | 0.0619  | -4.0530 |
| H  | 3.1027  | -0.2831 | -3.5703 |
| C  | 3.6069  | 0.7047  | -5.2961 |
| H  | 3.1590  | 0.0020  | -5.9317 |
| H  | 4.4408  | 1.0993  | -5.7847 |

|    |         |         |         |
|----|---------|---------|---------|
| H  | 2.9053  | 1.4649  | -5.1321 |
| C  | 4.8898  | -1.0505 | -4.2561 |
| H  | 5.1440  | -1.5191 | -3.3477 |
| H  | 5.7752  | -0.7389 | -4.7285 |
| H  | 4.4420  | -1.7692 | -4.8806 |
| C  | 4.6902  | 2.5287  | -0.0862 |
| N  | 3.4334  | 3.9858  | 1.3009  |
| N  | 2.3255  | 4.0144  | 3.1076  |
| C  | 2.4276  | 3.4448  | 1.9418  |
| C  | 4.0773  | 4.9328  | 2.0423  |
| O  | 4.9828  | 5.5469  | 1.7475  |
| C  | 3.2970  | 4.9505  | 3.3073  |
| O  | 3.4699  | 5.5985  | 4.2394  |
| C  | 3.8186  | 3.6854  | 0.0148  |
| C  | 1.2929  | 3.7593  | 4.0487  |
| H  | 0.7181  | 3.0229  | 3.5791  |
| C  | 1.8329  | 3.2310  | 5.2884  |
| H  | 2.4562  | 3.9237  | 5.7578  |
| H  | 2.3552  | 2.3451  | 5.1215  |
| H  | 1.0418  | 3.0136  | 5.9315  |
| C  | 0.5026  | 4.9628  | 4.2434  |
| H  | -0.3021 | 4.7424  | 4.8763  |
| H  | 0.1233  | 5.3196  | 3.3391  |
| H  | 1.0629  | 5.7178  | 4.6949  |
| H  | 5.6311  | 2.7515  | 0.3094  |
| H  | 4.2833  | 1.7707  | 0.4962  |
| H  | 4.3105  | 4.5358  | -0.3567 |
| H  | 2.9743  | 3.5302  | -0.5440 |
| Au | 0.0319  | -2.4027 | 1.2073  |
| Au | -1.4484 | -1.9279 | -1.2007 |
| N  | -3.0929 | -3.4133 | -3.1267 |
| N  | -2.7219 | -4.4887 | -1.3112 |
| C  | -2.5011 | -3.3840 | -1.9401 |
| C  | -3.6786 | -4.6550 | -3.3193 |
| O  | -4.2347 | -5.0333 | -4.2552 |
| C  | -3.4184 | -5.3851 | -2.0538 |
| O  | -3.7323 | -6.4628 | -1.7505 |
| C  | -3.1746 | -2.3835 | -4.0470 |
| H  | -2.6591 | -1.6013 | -3.5829 |
| C  | -2.4959 | -2.7187 | -5.2931 |
| H  | -2.5409 | -1.8921 | -5.9336 |
| H  | -2.9581 | -3.5264 | -5.7690 |
| H  | -1.4905 | -2.9339 | -5.1251 |
| C  | -4.5570 | -1.9990 | -4.2548 |
| H  | -5.0326 | -1.7625 | -3.3513 |
| H  | -5.1057 | -2.7673 | -4.7199 |
| H  | -4.6012 | -1.1578 | -4.8815 |
| C  | -2.3241 | -4.7636 | -0.0048 |
| N  | -0.4555 | -5.2339 | 1.3533  |
| N  | 0.4626  | -4.5984 | 3.1122  |
| C  | 0.0506  | -4.2342 | 1.9549  |
| C  | -0.4790 | -6.3304 | 2.1318  |
| O  | -0.9076 | -7.3315 | 1.8648  |
| C  | 0.1577  | -5.8808 | 3.3509  |
| O  | 0.3443  | -6.4726 | 4.2986  |
| C  | -0.9396 | -5.2348 | 0.0496  |
| C  | 1.1869  | -3.7698 | 4.0343  |
| H  | 1.2902  | -2.8743 | 3.5382  |
| C  | 0.4171  | -3.5621 | 5.2598  |
| H  | 0.2525  | -4.4433 | 5.7536  |
| H  | -0.4749 | -3.1024 | 5.0493  |
| H  | 0.9567  | -2.9373 | 5.8807  |
| C  | 2.5013  | -4.3620 | 4.2890  |
| H  | 3.0467  | -3.7161 | 4.8899  |
| H  | 3.0156  | -4.5062 | 3.4076  |
| H  | 2.4197  | -5.2573 | 4.7812  |
| H  | -2.9772 | -5.4889 | 0.3516  |
| H  | -2.4353 | -3.9074 | 0.5258  |

|    |         |         |         |
|----|---------|---------|---------|
| H  | -0.8744 | -6.2009 | -0.3008 |
| H  | -0.3449 | -4.6228 | -0.5146 |
| Au | 0.0395  | 0.0205  | -2.6791 |
| Au | -2.2720 | -0.8430 | 1.2205  |
| Au | -2.2758 | 0.8256  | -1.1714 |
| Au | -0.0081 | 0.0260  | -0.0132 |
| Au | 0.0782  | 0.0029  | 2.6633  |
| Cl | 0.0023  | 0.0061  | -4.8476 |
| Cl | 0.0116  | 0.0125  | 4.8431  |
| N  | -4.2168 | 1.8758  | -3.0880 |
| N  | -5.0962 | 1.1741  | -1.3213 |
| C  | -4.0041 | 1.3735  | -1.9665 |
| C  | -5.5584 | 2.0460  | -3.3463 |
| O  | -6.0726 | 2.4407  | -4.2508 |
| C  | -6.1998 | 1.5355  | -2.0723 |
| O  | -7.2940 | 1.4596  | -1.7888 |
| C  | -3.2466 | 2.3096  | -4.0347 |
| H  | -2.3476 | 2.0939  | -3.5426 |
| C  | -3.3172 | 1.5675  | -5.2751 |
| H  | -2.5428 | 1.8852  | -5.9002 |
| H  | -4.2256 | 1.7286  | -5.7595 |
| H  | -3.1869 | 0.5464  | -5.1045 |
| C  | -3.3498 | 3.7564  | -4.2293 |
| H  | -3.2881 | 4.2766  | -3.3356 |
| H  | -4.2426 | 4.0093  | -4.7058 |
| H  | -2.5731 | 4.0699  | -4.8478 |
| C  | -5.2428 | 0.7288  | -0.0588 |
| N  | -5.1011 | -1.1976 | 1.3274  |
| N  | -4.1782 | -1.8921 | 3.0894  |
| C  | -3.9613 | -1.3924 | 1.9663  |
| C  | -6.2007 | -1.6249 | 2.0887  |
| O  | -7.2580 | -1.5496 | 1.7741  |
| C  | -5.5020 | -2.0888 | 3.3372  |
| O  | -6.0587 | -2.5235 | 4.2745  |
| C  | -5.2409 | -0.7615 | 0.0801  |
| C  | -3.1989 | -2.3123 | 4.0308  |
| H  | -2.3292 | -2.0647 | 3.5608  |
| C  | -3.3021 | -1.5578 | 5.2766  |
| H  | -4.2092 | -1.7376 | 5.7662  |
| H  | -3.1924 | -0.5400 | 5.1063  |
| H  | -2.5353 | -1.8561 | 5.9057  |
| C  | -3.2746 | -3.7560 | 4.2407  |
| H  | -2.4928 | -4.0442 | 4.8436  |
| H  | -3.2149 | -4.2713 | 3.3498  |
| H  | -4.1604 | -4.0238 | 4.7281  |
| H  | -6.1391 | 1.0984  | 0.3150  |
| H  | -4.4907 | 1.0772  | 0.5577  |
| H  | -6.1245 | -1.1174 | -0.3352 |
| H  | -4.4808 | -1.1081 | -0.5415 |

200

7 NHC-Me T1 Excited State

|    |        |        |         |
|----|--------|--------|---------|
| Au | 2.2783 | 0.8245 | -1.0989 |
| Au | 1.7876 | 1.6617 | 1.5971  |
| N  | 2.8115 | 4.4183 | 1.9692  |
| N  | 4.1862 | 3.2498 | 0.9987  |
| C  | 2.9881 | 3.2221 | 1.5163  |
| C  | 3.8677 | 5.1763 | 1.7441  |
| H  | 3.9259 | 6.1583 | 2.0412  |
| C  | 4.7345 | 4.4432 | 1.1336  |
| H  | 5.6801 | 4.6692 | 0.8008  |
| C  | 1.6720 | 4.8374 | 2.6815  |
| H  | 1.0332 | 4.0139 | 2.6315  |
| C  | 2.0222 | 5.1012 | 4.0632  |
| H  | 1.1697 | 5.3692 | 4.5984  |
| H  | 2.6995 | 5.8896 | 4.1412  |
| H  | 2.4388 | 4.2587 | 4.5122  |
| C  | 1.0473 | 5.9732 | 2.0267  |
| H  | 0.8056 | 5.7539 | 1.0377  |



|    |         |         |         |
|----|---------|---------|---------|
| H  | 1.6638  | 6.8130  | 2.0414  |
| H  | 0.1714  | 6.2239  | 2.5299  |
| C  | 4.8211  | 2.1455  | 0.4546  |
| N  | 4.8923  | 2.1486  | -0.9242 |
| N  | 4.4403  | 1.7976  | -2.8913 |
| C  | 3.9859  | 1.6190  | -1.6977 |
| C  | 5.8944  | 2.6349  | -1.6313 |
| H  | 6.7193  | 3.0798  | -1.2055 |
| C  | 5.6074  | 2.4106  | -2.8690 |
| H  | 6.1383  | 2.6300  | -3.7205 |
| C  | 3.8298  | 1.2879  | -4.0591 |
| H  | 2.8625  | 1.0310  | -3.7647 |
| C  | 3.7601  | 2.2978  | -5.0953 |
| H  | 4.7002  | 2.5414  | -5.4743 |
| H  | 3.3041  | 3.1670  | -4.7480 |
| H  | 3.1881  | 1.9284  | -5.8824 |
| C  | 4.5213  | 0.0904  | -4.4930 |
| H  | 3.9982  | -0.3324 | -5.2876 |
| H  | 4.5686  | -0.6063 | -3.7199 |
| H  | 5.4906  | 0.3010  | -4.8148 |
| H  | 4.2773  | 1.3080  | 0.7486  |
| H  | 5.7908  | 2.1012  | 0.8298  |
| Au | -2.3128 | 0.4117  | -1.4987 |
| Au | -2.3243 | -0.6317 | 1.1045  |
| N  | -4.9333 | -1.7058 | 2.0468  |
| N  | -5.1840 | 0.0455  | 1.0158  |
| C  | -4.2689 | -0.7719 | 1.4588  |
| C  | -6.2309 | -1.4841 | 1.9815  |
| H  | -6.9283 | -2.1094 | 2.4025  |
| C  | -6.3921 | -0.3795 | 1.3345  |
| H  | -7.2519 | 0.1286  | 1.0883  |
| C  | -4.3383 | -2.7683 | 2.7586  |
| H  | -3.3223 | -2.6696 | 2.5425  |
| C  | -4.5475 | -2.5848 | 4.1851  |
| H  | -4.0825 | -3.3543 | 4.7089  |
| H  | -5.5614 | -2.6068 | 4.4265  |
| H  | -4.1406 | -1.6830 | 4.5086  |
| C  | -4.8189 | -4.0455 | 2.2686  |
| H  | -4.6586 | -4.1474 | 1.2433  |
| H  | -5.8357 | -4.1771 | 2.4615  |
| H  | -4.3123 | -4.8151 | 2.7544  |
| C  | -4.9041 | 1.2588  | 0.4129  |
| N  | -5.0755 | 1.2915  | -0.9592 |
| N  | -4.6744 | 1.2877  | -2.9734 |
| C  | -4.1143 | 1.1022  | -1.8242 |
| C  | -6.2051 | 1.5962  | -1.5728 |
| H  | -7.0809 | 1.7976  | -1.0725 |
| C  | -5.9483 | 1.5935  | -2.8367 |
| H  | -6.5659 | 1.7856  | -3.6357 |
| C  | -3.9814 | 1.2271  | -4.2041 |
| H  | -3.0751 | 0.7732  | -3.9543 |
| C  | -4.6912 | 0.3959  | -5.1549 |
| H  | -5.5864 | 0.8310  | -5.4662 |
| H  | -4.8987 | -0.5428 | -4.7563 |
| H  | -4.0984 | 0.2655  | -6.0004 |
| C  | -3.7227 | 2.5635  | -4.7024 |
| H  | -3.1599 | 2.5014  | -5.5759 |
| H  | -3.1839 | 3.1223  | -4.0078 |
| H  | -4.6080 | 3.0660  | -4.9279 |
| H  | -3.9053 | 1.4740  | 0.6197  |
| H  | -5.5236 | 1.9827  | 0.8324  |
| Au | -0.0794 | 2.2855  | -1.2225 |
| Au | -1.1505 | 1.8699  | 1.4001  |
| N  | -2.3255 | 3.9506  | 3.0929  |
| N  | -2.5089 | 4.4309  | 1.1026  |
| C  | -2.0471 | 3.5173  | 1.9106  |
| C  | -2.9498 | 5.1105  | 3.0324  |
| H  | -3.2614 | 5.6209  | 3.8690  |

|    |         |         |         |
|----|---------|---------|---------|
| C  | -3.0677 | 5.4153  | 1.7830  |
| H  | -3.5025 | 6.2338  | 1.3345  |
| C  | -2.1130 | 3.1931  | 4.2730  |
| H  | -1.3538 | 2.5251  | 4.0162  |
| C  | -1.6736 | 4.0339  | 5.3639  |
| H  | -1.4006 | 3.4262  | 6.1623  |
| H  | -2.4288 | 4.6673  | 5.7035  |
| H  | -0.8473 | 4.6082  | 5.0993  |
| C  | -3.3082 | 2.4345  | 4.5932  |
| H  | -3.5772 | 1.8203  | 3.7968  |
| H  | -4.1057 | 3.0632  | 4.8314  |
| H  | -3.1128 | 1.8224  | 5.4121  |
| C  | -2.5081 | 4.3055  | -0.2761 |
| N  | -1.4276 | 4.8788  | -0.9224 |
| N  | 0.2732  | 5.0890  | -2.0473 |
| C  | -0.4446 | 4.1992  | -1.4483 |
| C  | -1.3130 | 6.1638  | -1.1990 |
| H  | -1.9941 | 6.8685  | -0.8897 |
| C  | -0.2427 | 6.2928  | -1.9050 |
| H  | 0.1784  | 7.1346  | -2.3196 |
| C  | 1.4207  | 4.8077  | -2.8187 |
| H  | 1.5284  | 3.7729  | -2.7290 |
| C  | 1.1799  | 5.1560  | -4.2058 |
| H  | 1.0247  | 6.1805  | -4.3243 |
| H  | 0.3525  | 4.6480  | -4.5814 |
| H  | 2.0078  | 4.9004  | -4.7822 |
| C  | 2.5848  | 5.4668  | -2.2543 |
| H  | 3.4324  | 5.1989  | -2.7979 |
| H  | 2.7310  | 5.1888  | -1.2613 |
| H  | 2.5003  | 6.5048  | -2.3013 |
| H  | -3.3795 | 4.7426  | -0.6409 |
| H  | -2.4875 | 3.2909  | -0.5036 |
| Au | -1.3623 | -2.0791 | -1.2879 |
| Au | -0.2622 | -2.4012 | 1.2985  |
| N  | -0.3402 | -4.8320 | 2.9637  |
| N  | -0.3609 | -5.2863 | 0.9594  |
| C  | -0.3013 | -4.2865 | 1.7956  |
| C  | -0.4096 | -6.1450 | 2.8674  |
| H  | -0.4466 | -6.7618 | 3.6878  |
| C  | -0.4254 | -6.4347 | 1.6095  |
| H  | -0.4730 | -7.3464 | 1.1351  |
| C  | -0.2391 | -4.1053 | 4.1759  |
| H  | -0.5305 | -3.1348 | 3.9250  |
| C  | -1.1449 | -4.6352 | 5.1746  |
| H  | -1.1799 | -3.9734 | 5.9760  |
| H  | -0.8292 | -5.5575 | 5.5451  |
| H  | -2.1100 | -4.7406 | 4.7998  |
| C  | 1.1406  | -4.0761 | 4.6288  |
| H  | 1.7559  | -3.6455 | 3.9077  |
| H  | 1.4888  | -5.0331 | 4.8527  |
| H  | 1.2018  | -3.4971 | 5.4915  |
| C  | -0.3140 | -5.1471 | -0.4184 |
| N  | -1.5454 | -5.0380 | -1.0379 |
| N  | -3.1330 | -4.2698 | -2.0833 |
| C  | -2.0348 | -3.9201 | -1.5010 |
| C  | -2.3296 | -6.0572 | -1.3388 |
| H  | -2.1180 | -7.0273 | -1.0739 |
| C  | -3.3266 | -5.5708 | -1.9964 |
| H  | -4.1419 | -6.0452 | -2.4073 |
| C  | -3.9788 | -3.3813 | -2.7808 |
| H  | -3.5571 | -2.4449 | -2.5897 |
| C  | -3.9244 | -3.6525 | -4.2042 |
| H  | -4.2778 | -4.6073 | -4.4278 |
| H  | -2.9530 | -3.5631 | -4.5658 |
| H  | -4.5253 | -2.9710 | -4.7116 |
| C  | -5.3267 | -3.4228 | -2.2400 |
| H  | -5.9104 | -2.7046 | -2.7198 |
| H  | -5.3329 | -3.2192 | -1.2177 |

|    |         |         |         |
|----|---------|---------|---------|
| H  | -5.7812 | -4.3470 | -2.3997 |
| H  | 0.1781  | -5.9776 | -0.8085 |
| H  | 0.2133  | -4.2757 | -0.6355 |
| Au | 0.1463  | -0.0592 | 2.7852  |
| Au | 1.6483  | -1.8603 | -1.1029 |
| Au | 2.3194  | -0.9855 | 1.5541  |
| Au | 0.0742  | -0.0708 | 0.0631  |
| Au | 0.0533  | -0.1238 | -2.6051 |
| Cl | -0.8224 | -0.4567 | 4.7886  |
| Cl | 0.6951  | -0.2014 | -4.7788 |
| N  | 4.8976  | -1.8661 | 2.6060  |
| N  | 4.1342  | -3.3272 | 1.3845  |
| C  | 3.8822  | -2.1367 | 1.8558  |
| C  | 5.7628  | -2.8598 | 2.6107  |
| H  | 6.6333  | -2.8390 | 3.1557  |
| C  | 5.2850  | -3.7814 | 1.8452  |
| H  | 5.6602  | -4.7056 | 1.6012  |
| C  | 5.0031  | -0.7093 | 3.4109  |
| H  | 4.2243  | -0.1026 | 3.0693  |
| C  | 4.7608  | -1.0421 | 4.8013  |
| H  | 4.7586  | -0.1719 | 5.3718  |
| H  | 5.5028  | -1.6689 | 5.1803  |
| H  | 3.8365  | -1.5060 | 4.9170  |
| C  | 6.2769  | -0.0487 | 3.1987  |
| H  | 6.4424  | 0.1474  | 2.1886  |
| H  | 7.0761  | -0.6149 | 3.5544  |
| H  | 6.2850  | 0.8533  | 3.7212  |
| C  | 3.2311  | -4.0826 | 0.6574  |
| N  | 3.4353  | -4.1201 | -0.7107 |
| N  | 3.1636  | -3.7906 | -2.7210 |
| C  | 2.7890  | -3.3700 | -1.5610 |
| C  | 4.1979  | -4.9925 | -1.3435 |
| H  | 4.7902  | -5.6780 | -0.8579 |
| C  | 4.0234  | -4.7822 | -2.6058 |
| H  | 4.4391  | -5.2553 | -3.4170 |
| C  | 2.6128  | -3.3228 | -3.9405 |
| H  | 2.3309  | -2.3380 | -3.7438 |
| C  | 3.5986  | -3.3432 | -5.0012 |
| H  | 3.8477  | -4.3142 | -5.2904 |
| H  | 4.4683  | -2.8387 | -4.7328 |
| H  | 3.1941  | -2.8698 | -5.8357 |
| C  | 1.4248  | -4.0882 | -4.2721 |
| H  | 0.9837  | -3.6775 | -5.1218 |
| H  | 0.7292  | -4.0445 | -3.4975 |
| H  | 1.6598  | -5.0855 | -4.4708 |
| H  | 2.2886  | -3.6782 | 0.8275  |
| H  | 3.2734  | -5.0593 | 1.0153  |
